# Supplementary material for: Context-Dependent Dual Role of SKI8 Homologs in mRNA Synthesis and Turnover
Source: PubMed Central journal article supplement (PMC3325215; doi:10.1371/journal.pgen.1002652), 2012-04-12
Supplement: pgen.1002652.s004.pdf [file pgen.1002652.s004.pdf]

## Formatted Alignments

|                                   | 10                   | 20                                     | 30                                  |                                                                  |
|-----------------------------------|----------------------|----------------------------------------|-------------------------------------|------------------------------------------------------------------|
| <i>Ostreococcus tauri</i>         | - - - - -            | - - - - - M K R K A C E                | <b>E V</b> G I A S F H C E L P      | <b>G</b> T A                                                     |
| <i>Canis lupus</i>                | - - - - -            | <b>M M</b> D <b>T E R L</b> A L        | <b>P</b> P P D P L <b>D L</b> P L   | <b>R</b> P V E L <b>G</b> C T <b>G</b> R W                       |
| <i>Saccharmyces cerevisiae</i>    | - - - - -            | - - - - -                              | M S E G F S S S S                   | <b>I</b> Q E L Y Q S L K E I T N N                               |
| <i>Aspergillus nidulans</i>       | - - - - -            | - - - - -                              | M A E T V A S I L V                 | D L N <b>L</b> K T E N L S <b>G</b> S A                          |
| <i>Bos taurus</i>                 | - - - - -            | <b>M M E T E R L</b> V L               | <b>P</b> P P D P L <b>D L</b> P L   | <b>R A</b> V E L <b>G</b> C T <b>G</b> R W                       |
| <i>Homo sapiens</i>               | - - - - -            | <b>M M E T E R L</b> V L               | <b>P</b> P P D P L <b>D L</b> P L   | <b>R A</b> V E L <b>G</b> C T <b>G</b> H W                       |
| <i>Pan troglodytes</i>            | - - - - -            | - - - - -                              | - - - - -                           | - - - - -                                                        |
| <i>Dictyostelium discoideum</i>   | <b>M T T T V Q D</b> | I Q D F L <b>R</b> E L E G L E K E S T | <b>G</b> E L A <b>A</b> S T P S H L | <b>V</b> Y N                                                     |
| <i>Rattus norvegicus</i>          | - - - - -            | <b>M M E T E R L</b> V L               | <b>P</b> P P D P L N <b>L</b> P L   | <b>R A</b> L E V <b>G</b> C T <b>G</b> R W                       |
| <i>Selaginella moellendorffii</i> | - - - - -            | - - - - -                              | M A <b>P</b> P K L G G              | <b>E L</b> P F <b>K I</b> G V A <b>G</b> Y S <b>G</b> E L        |
| <i>Physcomitrella patens</i>      | - - - - -            | - - - - -                              | M A <b>P</b> - R L G G              | <b>D V</b> P F <b>K L</b> S L A <b>G</b> Y <b>G</b> <b>G</b> N L |
| <i>Brachypodium distachyon</i>    | - - - - -            | - - - - -                              | - - - - -                           | - - - - -                                                        |
| <i>Oryza sativa</i>               | - - - - -            | - - - - -                              | - - - - -                           | - - - - -                                                        |
| <i>Glycine max</i>                | - - - - -            | - - - - -                              | M D <b>P</b> I Q A A N              | <b>E L</b> A F <b>R V</b> G F S <b>G</b> H S <b>G</b> H L        |
| <i>Arabidopsis lyrata</i>         | - - - - -            | - - - - -                              | M N R V Q A G N                     | <b>E L</b> G F <b>R V</b> G F S <b>G</b> H G <b>G</b> H L        |
| <i>Arabidopsis thaliana</i>       | - - - - -            | - - - - -                              | M N K V E A G N                     | <b>E L</b> G F <b>R V</b> G F S <b>G</b> H G <b>G</b> H L        |
|                                   | M T T T V Q D        | M M E T E R L M                        | P . L R . G G                       |                                                                  |

|                                   | 70                           | 80                                            | 90                                                          |             |
|-----------------------------------|------------------------------|-----------------------------------------------|-------------------------------------------------------------|-------------|
| <i>Ostreococcus tauri</i>         | A N - - - - -                | - - - - - V H G - -                           | <b>I</b> L V Q L P L <b>P</b> K <b>G</b>                    | V N E E R V |
| <i>Canis lupus</i>                | H G L - - - - -              | <b>P</b> P - C A P D <b>L</b> Q Q E           | <b>A E</b> Q L <b>F L</b> S S P <b>A</b>                    | W L P L H G |
| <i>Saccharmyces cerevisiae</i>    | D E - - - - -                | <b>P</b> K - - - H A N D I                    | <b>I</b> K D R <b>F L</b> R <b>P</b> S N A L P W S L        |             |
| <i>Aspergillus nidulans</i>       | R Q R - - - - -              | <b>P</b> R Q S A S D <b>L</b> K D E           | <b>L E</b> K E <b>F L</b> T <b>P</b> S P R F S P E W        |             |
| <i>Bos taurus</i>                 | H G L - - - - -              | <b>P</b> P - C A P D <b>L</b> Q Q E           | <b>A E</b> R L <b>F L</b> S S P <b>A</b>                    | W L P L H G |
| <i>Homo sapiens</i>               | H G L - - - - -              | <b>P</b> P - C A P D <b>L</b> Q Q E           | <b>A E</b> Q L <b>F L</b> S S P <b>A</b>                    | W L P L H G |
| <i>Pan troglodytes</i>            | - - - - -                    | - - - - -                                     | - - - - -                                                   | - - - - -   |
| <i>Dictyostelium discoideum</i>   | D N N <b>D F S L F N F P</b> | I S S N V T <b>I</b> P K Q N N Q Q D <b>I</b> | K K E <b>L</b> S Q Q Y I N                                  |             |
| <i>Rattus norvegicus</i>          | H G L - - - - -              | <b>P</b> P - C A P D <b>L</b> C Q E           | <b>A E</b> Q L <b>F L</b> S S P <b>A</b>                    | W L P L H G |
| <i>Selaginella moellendorffii</i> | P V Q - - - - -              | <b>P</b> P Q T S A G <b>I</b> L A E           | <b>I E</b> E K <b>Y L</b> V <b>P</b> R <b>L</b> D R E I D D |             |
| <i>Physcomitrella patens</i>      | P P F - - - - -              | <b>P</b> P <b>E</b> T R E S <b>A</b> L R K    | <b>I E</b> E Q <b>Y L</b> T <b>P</b> C <b>L</b> D E A A S D |             |
| <i>Brachypodium distachyon</i>    | - - - - -                    | - - - - -                                     | - - - - -                                                   | - - - - -   |
| <i>Oryza sativa</i>               | - - - - -                    | - - - - -                                     | - - - - -                                                   | - - - - -   |
| <i>Glycine max</i>                | P A F - - - - -              | <b>P</b> S <b>E</b> T P E S <b>I</b> K K Y    | <b>I E</b> E T <b>Y L</b> Q <b>P</b> R <b>L</b> D P D D F S |             |
| <i>Arabidopsis lyrata</i>         | P A F - - - - -              | - A K <b>E</b> T K E S <b>I</b> K K H         | <b>I E</b> E K <b>Y L</b> L <b>P</b> R <b>L</b> E P D Q F S |             |
| <i>Arabidopsis thaliana</i>       | P A F - - - - -              | - A K <b>E</b> T K E S <b>I</b> K K H         | <b>I E</b> E K <b>Y L</b> I <b>P</b> R <b>L</b> E P D Q F S |             |
|                                   | D F S L F N F P              | E .                                           | I E . L P .                                                 |             |

40 50 60  
T E E E I L K T V R - - - - - R F N A D  
E L L N V P G A - - - - - P E S T L P  
A D V E L F E D R I T K - - - - - L D F E S T  
F D A Q L A E E E K G S - - - - - Y R H R G P  
E L L N V P G A - - - - - P E S T L P  
E L L N L P G A - - - - - P E S S L P  
- - - - -  
N D K S L K T N I T A S G P N S I P D L R V F  
E L L N V P G P - - - - - P E S T L P  
Q V E I L P S I S R S N P L D D L P E L I L P  
S V V N L P P V C R D S P F S N L P D L V L P  
- - - - -  
R L E P L S T E E R R N P L R S I P D F I P P  
R V E P L Y T A E R D D A V N S L P D F V S P  
R V E P F Y T A E R D D A L N S L P D F V S P  
. L R S L P . . P

100 110 120  
L A E I S I E K D V D G - - - - - F H P E  
V E H S V R K W Q R - - - - - K M D P W S  
L D M V Q D V P H T S S - - - - - P E D C S G K  
L N R L Q K R W D V P - - - - -  
V E H S A R E W Q R - - - - - K M D P W S  
V E H S A R K W Q R - - - - - K T D P W S  
- - - - -  
V E L I K D N K F Y Q N N S W P R T I D C T G  
V E H S A R K W Q R - - - - - K T D P W S  
V K R T G K N W E V D W F G D G F Y L Y E P S  
V A L C G K Q W D F D W F G E G V Q E L Q P S  
- - - - -  
P E K V G R Q W E F D W F D R A K V P L E P S  
A E K A E N Q W D F D W F S R V K V P L Q P S  
A E K A E N Q W D F D W F S R V K M P L Q P S  
V E . W D W F S

|                                   |           |           |                                       |           |           |                     |
|-----------------------------------|-----------|-----------|---------------------------------------|-----------|-----------|---------------------|
|                                   |           | 130       |                                       | 140       |           | 150                 |
| <i>Ostreococcus tauri</i>         | N I G K L | A M K G   | H E P L F V P C T P - - - - -         | - - - - - | - - - - - | K G C I E L L K R   |
| <i>Canis lupus</i>                | L L A T L | G A P V   | P S D L Q A Q R - - - - -             | - - - - - | - - - - - | H P N T G Q I L G Y |
| <i>Saccharmyces cerevisiae</i>    | L D Y K E | L L K V   | P D P I N R T S Y Q F K R T G - - -   | - - - - - | - - - - - | L E G K I S G Y K E |
| <i>Aspergillus nidulans</i>       | V N Y T D | L Y E I   | A P T Q T R T I V R F T R E G - - -   | - - - - - | - - - - - | L E G R V T G Y H E |
| <i>Bos taurus</i>                 | L L A T L | G A P V   | P S D L Q A Q R - - - - -             | - - - - - | - - - - - | H P T T G Q I L G Y |
| <i>Homo sapiens</i>               | L L A V L | G A P V   | P S D L Q A Q R - - - - -             | - - - - - | - - - - - | H P T T G Q I L G Y |
| <i>Pan troglodytes</i>            | - - - - - | - - - - - | - - - - -                             | - - - - - | - - - - - | - - - - -           |
| <i>Dictyostelium discoideum</i>   | M A W K D | L L G I   | Q V S E P S S T I E L R V D N - - -   | - - - - - | - - - - - | V N H R L S M T E Y |
| <i>Rattus norvegicus</i>          | L L A A L | G T P V   | P S D L Q A Q R - - - - -             | - - - - - | - - - - - | H P T T G H I L G Y |
| <i>Selaginella moellendorffii</i> | L A P L T | I S P V   | W K P P F R R K E S E Y R T S E - - - | - - - - - | - - - - - | E Q G R V W V P E F |
| <i>Physcomitrella patens</i>      | L P C L T | I E P V   | W E P P Y T R G Q G D V R N G - - -   | - - - - - | - - - - - | H G V E D W I P D F |
| <i>Brachypodium distachyon</i>    | - - - M   | L V P A   | W E P P F R R R - P S L S P S - - -   | - - - - - | - - - - - | Q E P Q V W D P E S |
| <i>Oryza sativa</i>               | - - - M   | L V P A   | W E P P F R R R R P P L S S S S S     | S R       | Q E S Q   | V W D P E S         |
| <i>Glycine max</i>                | L P R T M | V V P V   | W E P P F R R S - - - N N G S - - -   | - - - - - | - - - - - | V K G I W E P K F   |
| <i>Arabidopsis lyrata</i>         | L P R S V | V V P     | T W E L P F R R Q - - - K V D T - - - | - - - - - | - - - - - | E N G A W E P K S   |
| <i>Arabidopsis thaliana</i>       | L P R S V | V V P     | T W E L P F R R Q - - - K E D T - - - | - - - - - | - - - - - | E N G A W E P K S   |
|                                   | L         | . . P V   |                                       | R         |           | S R . .             |

|                                   |               |                                           |                           |                 |           |                             |
|-----------------------------------|---------------|-------------------------------------------|---------------------------|-----------------|-----------|-----------------------------|
|                                   |               | 190                                       |                           | 200             |           | 210                         |
| <i>Ostreococcus tauri</i>         | - - - A M L   | L M K E N C T V T V V H S K T K D         | - - - - -                 | - - - - -       | - - - - - | - - - - - P                 |
| <i>Canis lupus</i>                | P I - - S Q S | L W G N P T Q Y P F W P G G M D E         | - - - - -                 | - - - - -       | - - - - - | - - - - - P T I T D         |
| <i>Saccharmyces cerevisiae</i>    | H N - - Q N S | V R G S T A Q L P F T P G G I P M K - - - | - - - - -                 | - - - - -       | - - - - - | S V K T G S E Q N           |
| <i>Aspergillus nidulans</i>       | G R - - A     | D F V R G A A G F F P F A P G G L D G     | - - - - -                 | - - - - -       | - - - - - | - - - - - V E A I A E M E   |
| <i>Bos taurus</i>                 | P I - - S Q S | L W G N P T Q Y P F W P G G M D E         | - - - - -                 | - - - - -       | - - - - - | - - - - - P S I T D         |
| <i>Homo sapiens</i>               | P A - - S Q S | L W G N P T R Y P F W P G G M D E         | - - - - -                 | - - - - -       | - - - - - | - - - - - P T I T D         |
| <i>Pan troglodytes</i>            | - - - - -     | - - - - -                                 | - - - - -                 | - - - - -       | - - - - - | - - - - -                   |
| <i>Dictyostelium discoideum</i>   | K H N G T     | D F H R G D A S S F P F L P G G L D D     | I Q K K T N - - N N N I E |                 |           |                             |
| <i>Rattus norvegicus</i>          | P A - - S Q S | L W G N P T Q Y P F W P G G M D E         | - - - - -                 | - - - - -       | - - - - - | - - - - - P S I T D         |
| <i>Selaginella moellendorffii</i> | N P - - A     | D F V R G S S S N Q P F R P G G V D L G   | - - - - -                 | - - - - -       | - - - - - | - - - - - E K I I P         |
| <i>Physcomitrella patens</i>      | H P - - E     | D F V R G T T S N H P F R P G G F D L P Q | - - - - -                 | - - - - -       | - - - - - | - - - - - S S - G K T V P   |
| <i>Brachypodium distachyon</i>    | P P - - K     | D F V R G R V N S R P F R P G G M H D     | D T A E A A V L E K A F P |                 |           |                             |
| <i>Oryza sativa</i>               | P A - - K     | D F V R G S V N S R P F R P G G L H D     | D A A A A A L E K A F P   |                 |           |                             |
| <i>Glycine max</i>                | - - - K       | D F V R G S I N N R P F R P G G L D D     | - - - - -                 | - - - - -       | - - - - - | - - - - - S R S L D R I L P |
| <i>Arabidopsis lyrata</i>         | P P - - K     | D F L R G S V N N R P F R P G G L E D     | - - - - -                 | - - - - -       | - - - - - | - - - - - S Q S S E R V L P |
| <i>Arabidopsis thaliana</i>       | P P - - K     | D F L R G S V N N R P F R P G G L E D     | - - - - -                 | - - - - -       | - - - - - | - - - - - S Q S S E R V L P |
|                                   | P N G         | D F . R G                                 |                           | . P F P G G D . |           | A S . P                     |

|                                   |                                                                           |                                       |   |     |  |       |
|-----------------------------------|---------------------------------------------------------------------------|---------------------------------------|---|-----|--|-------|
|                                   |                                                                           | 250                                   |   | 260 |  | 270   |
| <i>Ostreococcus tauri</i>         | D W V K K G A V I I D V G - - - - -                                       | T N G V D D K T K - - - K A G Y R L V |   |     |  |       |
| <i>Canis lupus</i>                | P G F K K G V D F A P K D H S - T P A P G L L S L S H L L E P L D L G G G |                                       |   |     |  |       |
| <i>Saccharmyces cerevisiae</i>    | E G M N R G I K P M D S P A E N E D Q N G Q F K E L K Q L N E I D N E L D |                                       |   |     |  |       |
| <i>Aspergillus nidulans</i>       | N F G A E G G L L E I A P G C S R G L Q F E A T K T K E T A E G D E E V E |                                       |   |     |  |       |
| <i>Bos taurus</i>                 | P G F K K G V D F A P K G H S - A P A A G L L S L S R L L E P L D L G G G |                                       |   |     |  |       |
| <i>Homo sapiens</i>               | P G F K K G M D F A P K D C P - T P A P G L L S L S C L L E P L D L G G G |                                       |   |     |  |       |
| <i>Pan troglodytes</i>            | - - - - - M D F A P K D C P - T P A P G L L S L S C L L E P L D L G G G   |                                       |   |     |  |       |
| <i>Dictyostelium discoideum</i>   | P G M I E G L I I I E E K E K - - E K E K I E E N L F Y N Q E M E E E E E |                                       |   |     |  |       |
| <i>Rattus norvegicus</i>          | P G F K K G V D F A P K - - - A P V P G L L S L S R L L E P L D L S G G   |                                       |   |     |  |       |
| <i>Selaginella moellendorffii</i> | P G F K R G L S N - L G V P E - P F T W S K K S D V S S - A E T F K E P E |                                       |   |     |  |       |
| <i>Physcomitrella patens</i>      | P G F K H G I D - - F G L P E - P Y I V R Q G W D V T - - A E T S R S A E |                                       |   |     |  |       |
| <i>Brachypodium distachyon</i>    | P G F G T G L D L G R L K E Y - N S H W K C F R D G E Q V E E Q P A S S S |                                       |   |     |  |       |
| <i>Oryza sativa</i>               | P G F R K G L D L G N L K E Y - K S H W K C Y Q D G E R V D E Q S T S S S |                                       |   |     |  |       |
| <i>Glycine max</i>                | P S L K Q G L D F G M L K P Y - P C S W N V C K E A N - - S L K S S S D E |                                       |   |     |  |       |
| <i>Arabidopsis lyrata</i>         | P S F K Q S L D L G D L M P Y - P Q T W S V Y E D Q S - - S H G N A S D E |                                       |   |     |  |       |
| <i>Arabidopsis thaliana</i>       | P S F K Q S L D L G D L M P Y - P Q T W S V Y E D H S - - S H G N A S D E |                                       |   |     |  |       |
|                                   | P G F K . G . D                                                           |                                       | . | .   |  | L . . |

160 170 180  
S G V E L S G K N A V V V G R S N I V G M P A  
K E V L L E N T N L S A T T S L S L R R P P G  
E V D L K E V A N A N A S N S L S I T R S I N  
V T - - V P A A A A N A K N S T S L L R R P A  
K E V L L E N T N L S S T T S L S L R R P P A  
K E V L L E N T N L S A T T S L S L R R P P G  
- - - - -  
H E V P L N Q Q I T S T - N S T S L M R A W N  
K E V L L E N T N L S A T T S L S L R R P P G  
E Q I K P E Y G - - - S D A A S S M L R K P G  
E Q V Q T E H A N L N S R N S S S V L R K P G  
V Q L E M A Q V F D S G - T G G M V A R M P G  
V Q M D M S D V F D S G - T G G I T P R M P G  
E E V D V A D L T S G A V E S G P L P R T S G  
V E V D L S E Q M Y G D Q D S G F F P R M V G  
V E V D L S E Q M Y G D Q D S G F F P R M V G  
E V L . S . S . R P G

220 230 240  
K R V C R E A D V I V A A C G S - A E M V K K  
L S T R - E E A E E E I D F E Q - D L L T V P  
G S S T M A N A T K L L H K D G Q G L F D I P  
S E A Q A A E R S K T G G K Q S - G L D R I I  
L S T R - E E A E E E I D F E K - D L L T L P  
L N T R - E E A E E E I D F E K - D L L T I P  
- - - - -  
K E E I D I D W L S F W K D P S - S L L N K P  
L S T R - E E A E E E I D F E K - D L L T V P  
E G A Q N G E W L A E V L E G K - P L Q T V A  
A G A L N G D W L R E V L H G G - P L Q K V A  
E G A R N G D W V R E L M S G G - P A Q I A P  
E G A R N G D W V R E L M S G G - P A Q V N P  
E G A S N G E W V H E I L N G G - P A Q T I P  
E G V S S G Q W V Q E L L N G G - P A Q T V P  
E G V S S G Q W V Q E L L N G G - P A Q T V P  
. . . W . E . G Q L T . P

280 290 300  
G - - - - - D V D Y A E V  
D - - - - - E D E T E A V G  
I R I E - - - - - A N E A K L K E E  
H A L Q - - - - - Q E E S D L H V E  
D - - - - - E D E S E A V G  
D - - - - - E D E N E A V G  
D - - - - - E D E N E A V G  
E - - - - - M E E E E I E Q E E  
D - - - - - E G E G E A A G  
K K D S - - - - - V L H Y E D L F R - -  
V Q E S S V F N H A S V A L I D D S L F N N I  
N Y - - - - T M D K Y S V Q F D D L F K I A  
N D - - - - T M D K Y S V Q F D D L F K I A  
K - - - - - L S G L S V Q F D D L F K K A  
N S V C R S M S L V K L S I Q F D D L F K K A  
N - - - - - S S K L S I Q F D D L F K K A  
K S Q D . . .

|                                   | 310                          | 320                                           | 330                             |
|-----------------------------------|------------------------------|-----------------------------------------------|---------------------------------|
| <i>Ostreococcus tauri</i>         | R - - - - -                  | - - - - -                                     | - - - - -                       |
| <i>Canis lupus</i>                | Q - - - - -                  | - - - - -                                     | - - - - - P G                   |
| <i>Saccharmyces cerevisiae</i>    | - - - - -                    | - - - - -                                     | - - - - - E K S                 |
| <i>Aspergillus nidulans</i>       | R D - - - -                  | - - - - -                                     | - - - - - E D V                 |
| <i>Bos taurus</i>                 | Q - - - - -                  | - - - - -                                     | - - - - - P G                   |
| <i>Homo sapiens</i>               | Q - - - - -                  | - - - - -                                     | - - - - - P G                   |
| <i>Pan troglodytes</i>            | Q - - - - -                  | - - - - -                                     | - - - - - P G                   |
| <i>Dictyostelium discoideum</i>   | E <b>E E</b> E - - -         | - - - - -                                     | - - - - - M E E                 |
| <i>Rattus norvegicus</i>          | - - - - -                    | - - - - -                                     | - - - - -                       |
| <i>Selaginella moellendorffii</i> | - - - - -                    | - - - - -                                     | - - - - - K A                   |
| <i>Physcomitrella patens</i>      | L R V V P V Q E L - -        | - - - - -                                     | - - - - - D K E                 |
| <i>Brachypodium distachyon</i>    | W <b>E E D</b> A V N N V F T | <b>E D D V Q Q L V</b> R <b>D E</b> G S Y E I | <b>D</b> E R K V D T L Q G      |
| <i>Oryza sativa</i>               | W <b>E E D</b> S D D K V P R | <b>E D H V Q Q L V</b> G <b>D E</b> E T N D V | <b>D</b> K Q N I S K L Q N      |
| <i>Glycine max</i>                | W <b>D E D</b> A V G D Q - - | <b>E D G</b> - - - - -                        | - - - - - H - - - - L S E       |
| <i>Arabidopsis lyrata</i>         | W <b>E E D</b> T F S E L - - | <b>E R D</b> G V - - - - -                    | - - - - - F N H S Y H T A G S E |
| <i>Arabidopsis thaliana</i>       | W <b>E E D</b> T F S E L - - | <b>E G D</b> - - - - -                        | - - - - - D - - H T A G S E     |
|                                   | E E D                        | E D D V Q Q L V D E                           | D                               |

|                                   | 370                                                                                                            | 380 | 390   |
|-----------------------------------|----------------------------------------------------------------------------------------------------------------|-----|-------|
| <i>Ostreococcus tauri</i>         | I C M L <b>L S N T</b> <b>L D S G A</b> P F <b>A L</b> A S R R - - - - - R <b>P</b> V R - - - - - A -          |     |       |
| <i>Canis lupus</i>                | R A S <b>S L E D</b> L <b>V L K E</b> T S T <b>A I</b> S P P E - - - P P K <b>P</b> V P Q - - - - - <b>E</b> Q |     |       |
| <i>Saccharmyces cerevisiae</i>    | A D N A D <b>D A E I</b> D E L <b>L P I G I</b> D F G R T K P V S K S V P V - - - K K E                        |     |       |
| <i>Aspergillus nidulans</i>       | G E E D <b>I D S L L P V E</b> F P A <b>L E</b> P R A P L L S G V K Q R Q G - - - G K E                        |     |       |
| <i>Bos taurus</i>                 | R A S <b>S L E D</b> L <b>V L K E</b> A A T <b>T V</b> A P P E - - - P P K <b>P</b> P P Q - - - - - <b>E</b> Q |     |       |
| <i>Homo sapiens</i>               | R A S <b>S L E D</b> L <b>V L K E</b> A S T <b>A V</b> S T P E - - - A P E <b>P</b> P S Q - - - - - <b>E</b> Q |     |       |
| <i>Pan troglodytes</i>            | R A S <b>S L E D</b> L <b>V L K E</b> A S T <b>A V</b> S T P E - - - A P E <b>P</b> P S Q - - - - - <b>E</b> Q |     |       |
| <i>Dictyostelium discoideum</i>   | S S I <b>S I D S I I</b> S I D S S T S S S L L K F K K K E E E D P L S N - Q K M                               |     |       |
| <i>Rattus norvegicus</i>          | R A S <b>S L E D</b> L <b>V L K E</b> A S T <b>V V</b> S T L E - - - P L K <b>P</b> P P Q - - - - - <b>E</b> Q |     |       |
| <i>Selaginella moellendorffii</i> | D E V V <b>L K D E V E</b> P E S E V D K I L A T E T V E A A <b>P</b> V P K A E <b>A</b> K Q E                 |     |       |
| <i>Physcomitrella patens</i>      | Y E E V <b>L L D E I L</b> G D P K V <b>V I</b> K S A K A H L K M S <b>P</b> N - - - - - R <b>E</b> V          |     |       |
| <i>Brachypodium distachyon</i>    | A Q T D <b>L D K M L L</b> S <b>S E V</b> Q D T H R E L S G S V D D K <b>P</b> A Q E - - - G M V               |     |       |
| <i>Oryza sativa</i>               | P Q S D <b>L D Q M L L</b> S <b>S V K</b> D T S R D S S G S G D G S M A K E - - - G K V                        |     |       |
| <i>Glycine max</i>                | S E M <b>S L D D I L</b> S A <b>D S E</b> G S K L H L D G F N D E I G Q Q K - - - K <b>E</b> A                 |     |       |
| <i>Arabidopsis lyrata</i>         | T D I <b>T V L D E I</b> L S S A K T <b>A I</b> L T D E A V T G N S D K Q L L - - K <b>E</b> G                 |     |       |
| <i>Arabidopsis thaliana</i>       | T D V <b>T V L D E I</b> L S S A K T <b>A I</b> M S E E A V T G S S D K Q L R - - K <b>E</b> G                 |     |       |
|                                   | . L . D . L . . . .                                                                                            |     | P A E |

|                                   | 430                                                                                                   | 440 | 450 |
|-----------------------------------|-------------------------------------------------------------------------------------------------------|-----|-----|
| <i>Ostreococcus tauri</i>         | T S R S L <b>V Y</b> T A P T G <b>A G</b> K S R - V <b>A D A L</b> L E E T L A <b>S D G G G R A L</b> |     |     |
| <i>Canis lupus</i>                | Q <b>W S F E P D</b> V <b>F Q K Q A I</b> L <b>H L E R H</b> D S V F V A A H T S A G - - K T V        |     |     |
| <i>Saccharmyces cerevisiae</i>    | S <b>W P F E L D</b> T <b>F Q K E A V Y</b> <b>H L E Q</b> G D S V F V A A H T S A G - - K T V        |     |     |
| <i>Aspergillus nidulans</i>       | E <b>W P F E L D</b> T <b>F Q K E A V Y</b> <b>H L E N</b> G D S V F V A A H T S A G - - K T V        |     |     |
| <i>Bos taurus</i>                 | Q <b>W A F E P D</b> V <b>F Q K Q A I</b> L <b>H L E R H</b> D S V F V A A H T S A G - - K T V        |     |     |
| <i>Homo sapiens</i>               | Q <b>W A F E P D</b> V <b>F Q K Q A I</b> L <b>H L E R H</b> D S V F V A A H T S A G - - K T V        |     |     |
| <i>Pan troglodytes</i>            | Q <b>W A F E P D</b> V <b>F Q K Q A I</b> L <b>H L E R H</b> D S V F V A A H T S A G - - K T V        |     |     |
| <i>Dictyostelium discoideum</i>   | V <b>Y P F E L D</b> S <b>F Q K Q A I</b> V <b>H M E K G E</b> S V F I <b>S</b> A H T S A G - - K T V |     |     |
| <i>Rattus norvegicus</i>          | Q <b>W A F E P D</b> V <b>F Q K Q A I</b> L <b>H L E Q H</b> D S V F V A A H T S A G - - K T V        |     |     |
| <i>Selaginella moellendorffii</i> | Q <b>F P F E L D</b> K <b>F Q K E A I Y</b> <b>H L E K N</b> E S V F V A A H T S A G - - K T V        |     |     |
| <i>Physcomitrella patens</i>      | S <b>F P F K L D</b> T <b>F Q K E A I Y</b> <b>H L E R N</b> E S V F V A A H T S A G - - K T V        |     |     |
| <i>Brachypodium distachyon</i>    | E <b>F P F E L D</b> K <b>F Q K E A I Y Y</b> <b>L E K G E</b> S V F V A A H T S A G - - K T V        |     |     |
| <i>Oryza sativa</i>               | E <b>Y P F E L D</b> K <b>F Q K E A I Y Y</b> <b>L Q</b> K G E S V F V A A H T S A G - - K T V        |     |     |
| <i>Glycine max</i>                | E <b>F P F E L D</b> A <b>F Q K E A I Y Y</b> <b>L E K G E</b> S V F V A A H T S A G - - K T V        |     |     |
| <i>Arabidopsis lyrata</i>         | E <b>F P F E L D</b> N <b>F Q K E A I C C</b> <b>L E K G E</b> S V F V A A H T S A G - - K T V        |     |     |
| <i>Arabidopsis thaliana</i>       | E <b>F P F E L D</b> N <b>F Q K E A I C C</b> <b>L E K G E</b> S V F V A A H T S A G - - K T V        |     |     |
|                                   | . P P F E L D F Q K E A I H L E . . . S V F V A A H T S A G G G K T V                                 |     |     |

340 350 360  
V A S A I T P V P G G - - - - - V G P M T  
I P R G D T V S A T P - - - - C - S A S L A  
A K S I S E E I M E E - - - - A - T E E T T  
M S D V E G G V K I G - - - - E - D D E L S  
G P R Q D T V S A S P - - - - G - S V P L A  
G P R G D T V S A S P - - - - C - S A P L A  
G P R G D A V S A S P - - - - C - S A P L A  
M E E M K E M K K E E - N I S S T L N T L S P  
G P R G D A A S A S P - - - - S - S T P L I  
W E H Q M L E D D S E - - - - V D D E D P I  
A S A V Y L D A Q T E - - - - N G H Q A M R  
A S A T L T R P D T D K Q E F D V I G D V S E  
A S E T I E N L D I E K Q K G G A Q G D V S E  
V E T I T L E A E V G - - T T E V S S R A H E  
S P K A E A E P E A K A S I S N E V S K G L E  
S P K A E A E P D A K A S I S N E V S K G L E

400 410 420  
F P T R F N F N H S F N R L L E C L S R V A R  
W A I P V D V T S P V G D F Y R L I P Q P A F  
W A H V V D L N H K I E N F D E L I P N P A R  
W A H V V D V N K H I S N F H E L V P D M A R  
W A I P V D V T S P V G D F Y R L I P Q P A F  
W A I P V D A T S P V G D F Y R L I P Q P A F  
W A I P V D A T S P V G D F Y R L I P Q P A F  
W A F H E T - K E I F T P F A E L I T N P A I  
W A V P V D V T S P V G D F Y R L I P Q P A F  
W V V M D G D S G V A E R F L E L I P D M A I  
W A V M E P V P N I S Q R F E E L V P D L A L  
W A L A G G D E D I A T N F H R E V P D M A I  
W A L V G G D E D I V T N F Y K L V P D M A I  
W A I H E T S E Q I V D S F H E L V P D M A L  
W A T K G D S Q D I A D R F Y E L V P D M A I  
W A T K G D S Q D I A D R F Y E L V P D M A I  
W A . . D . F E L . P A

460 470 480  
V V L P Y V A L V R E R A M A L A K T L R A R  
V A E Y A I A L A Q K H M T R T I Y T S P I K  
V A E Y A I A M A H R N M T K T I Y T S P I K  
V A E Y A I A L A S K H M T K A I Y T S P I K  
V A E Y A I A L A Q K H M T R T I Y T S P I K  
V A E Y A I A L A Q K H M T R T I Y T S P I K  
V A E Y A I A L A Q K H M T R T I Y T S P I K  
I A E Y A I A M A A K N M T R A I Y T S P I K  
V A E Y A I A L A Q K H M T R T I Y T S P I K  
V A E Y A F A L S A K H C T R A V Y T S P I K  
V A E Y A F A L A A K Q C T R A V Y T S P I K  
V A E Y A F A L A T K H C T R A V Y T A P I K  
V A E Y A F A L A T K H C T R A V Y T A P I K  
V A E Y A F A L A S K H C T R A V Y T A P I K  
V A E Y A F A L A T K H C T R A V Y T A P I K  
V A E Y A F A L A T K H C T R A V Y T A P I K  
V A E Y A . A L A K H . T R A . Y T S P I K

|                                   | 490                                                                       | 500                       | 510                 |
|-----------------------------------|---------------------------------------------------------------------------|---------------------------|---------------------|
| <i>Ostreococcus tauri</i>         | G I G V R A Y A G G E S E G W A L G - - - - G D A R C - - A V T T I E K   |                           |                     |
| <i>Canis lupus</i>                | A L S N Q K F R D F R N T F G D V G - - L L T G D V Q L H P E A S C L I M |                           |                     |
| <i>Saccharmyces cerevisiae</i>    | A L S N Q K F R D F K E T F D D V N I G L I T G D V Q I N P D A N C L I M |                           |                     |
| <i>Aspergillus nidulans</i>       | A L S N Q K F R D F R T E F D D V - - G I L T G D V Q I N P E A S C L I M |                           |                     |
| <i>Bos taurus</i>                 | A L S N Q K F R D F R N T F G D V G - - L L T G D V Q L H P E A S C L I M |                           |                     |
| <i>Homo sapiens</i>               | A L S N Q K F R D F R N T F G D V G - - L L T G D V Q L H P E A S C L I M |                           |                     |
| <i>Pan troglodytes</i>            | A L S N Q K F R D F R N T F G D V G - - L L T G D V Q L H P E A S C L I M |                           |                     |
| <i>Dictyostelium discoideum</i>   | A L S N Q K F R D F K N T F G D V G - - L I T G D V S V S P A S S C L V L |                           |                     |
| <i>Rattus norvegicus</i>          | A L S N Q K F R D F R N T F G D V G - - L L T G D V Q L H P E A S C L I M |                           |                     |
| <i>Selaginella moellendorffii</i> | T I S N Q K Y R D F S E K F - D V G - - L L T G D V S I R P E A S C L I M |                           |                     |
| <i>Physcomitrella patens</i>      | T I S N Q K F R D F G G K F - D V G - - L L T G D V S L R P E A S C L I M |                           |                     |
| <i>Brachypodium distachyon</i>    | T I S N Q K Y R D F C G K F - D V G - - L L T G D V S I R P E A T C L I M |                           |                     |
| <i>Oryza sativa</i>               | T I S N Q K Y R D F C G K F - D V G - - L L T G D V S I R P E A T C L I M |                           |                     |
| <i>Glycine max</i>                | T I S N Q K Y R D L C G K F - D V G - - L L T G D V S L R P E A S C L I M |                           |                     |
| <i>Arabidopsis lyrata</i>         | T I S N Q K Y R D F C G K F - D V G - - L L T G D V S I R P E A S C L I M |                           |                     |
| <i>Arabidopsis thaliana</i>       | T I S N Q K Y R D F C G K F - D V G - - L L T G D V S I R P E A S C L I M |                           |                     |
|                                   | . . S N Q K F R D F                                                       | F G D V G I G L L T G D V | . . P E A S C L I M |

|                                   | 550                                                                       | 560 | 570               |
|-----------------------------------|---------------------------------------------------------------------------|-----|-------------------|
| <i>Ostreococcus tauri</i>         | V D E L H M V S E D E R G G V L E G M L A R I - R H A T R S G R A R R G G |     |                   |
| <i>Canis lupus</i>                | F D E V H Y I N D A E R G V V W E E V L I M L P D H V S - - - - -         |     |                   |
| <i>Saccharmyces cerevisiae</i>    | F D E V H Y V N D Q D R G V V W E E V I I M L P Q H V K - - - - -         |     |                   |
| <i>Aspergillus nidulans</i>       | F D E V H Y V N D L E R G V V W E E V I I M L P E H V T - - - - -         |     |                   |
| <i>Bos taurus</i>                 | F D E V H Y I N D A E R G V V W E E V L I M L P D H V S - - - - -         |     |                   |
| <i>Homo sapiens</i>               | F D E V H Y I N D V E R G V V W E E V L I M L P D H V S - - - - -         |     |                   |
| <i>Pan troglodytes</i>            | F D E V H Y I N D A E R G V V W E E V L I M L P D H V S - - - - -         |     |                   |
| <i>Dictyostelium discoideum</i>   | F D E V H Y L N D Y E R G V V W E E V I I M L P A H V K - - - - -         |     |                   |
| <i>Rattus norvegicus</i>          | F D E V H Y I N D A E R G V V W E E V L I M L P E H V S - - - - -         |     |                   |
| <i>Selaginella moellendorffii</i> | F D E V H Y V N D A E R G V V W E E V I I M L P Q H V N - - - - -         |     |                   |
| <i>Physcomitrella patens</i>      | F D E V H Y V N D V E R G V V W E E V I I M L P P H V N - - - - -         |     |                   |
| <i>Brachypodium distachyon</i>    | F D E V H Y V N D A E R G V V W E E V I I M L P K H I N - - - - -         |     |                   |
| <i>Oryza sativa</i>               | F D E V H Y V N D A E R G V V W E E V I I M L P K H I N - - - - -         |     |                   |
| <i>Glycine max</i>                | F D E V H Y V N D V E R G V V W E E V I I M L P R H I N - - - - -         |     |                   |
| <i>Arabidopsis lyrata</i>         | F D E V H Y V N D V E R G V V W E E V I I M L P R H I N - - - - -         |     |                   |
| <i>Arabidopsis thaliana</i>       | F D E V H Y V N D V E R G V V W E E V I I M L P R H I N - - - - -         |     |                   |
|                                   | F D E V H Y V N D . E R G V V W E E V I I M L P                           | H V | R S G R A R R G G |

|                                   | 610                                                                       | 620                   | 630                 |
|-----------------------------------|---------------------------------------------------------------------------|-----------------------|---------------------|
| <i>Ostreococcus tauri</i>         | - - - - A E T Y V G - - T Y R P V E L R E H V V R E D - - - - - G V F V   |                       |                     |
| <i>Canis lupus</i>                | R L K R R Q I Y V I S T V A R P V P L - E H Y L F T G N S P K T Q G E L F |                       |                     |
| <i>Saccharmyces cerevisiae</i>    | R T K Q K N I Y V I S T P K R P V P L - E I N I W A K - - - - - K E L I   |                       |                     |
| <i>Aspergillus nidulans</i>       | R T K K K D I Y V I S T A K R P V P L - E H Y L W A G - - - - - K D K Y   |                       |                     |
| <i>Bos taurus</i>                 | R L K R R Q I Y V I S T V A R P V P L - E H Y L F T G N S P K T Q G E L F |                       |                     |
| <i>Homo sapiens</i>               | R L K R R Q I Y V I S T V T R P V P L - E H Y L F T G N S S K T Q G E L F |                       |                     |
| <i>Pan troglodytes</i>            | R L K R R Q I Y V I S T V T R P V P L - E H Y L F T G N S S K T Q G E L F |                       |                     |
| <i>Dictyostelium discoideum</i>   | R T K K M P I Y V I G T L K R P V P L - E H F I H T P S - - - - - N D L F |                       |                     |
| <i>Rattus norvegicus</i>          | R L K R R Q I Y V I S T V A R P V P L - E H Y L F T G N S P K T Q G E L F |                       |                     |
| <i>Selaginella moellendorffii</i> | R T K Q K K I Y V T G T T K R P V P L - E H C L F Y S - - - - - G E L H   |                       |                     |
| <i>Physcomitrella patens</i>      | R T K R K L I Y V T G T M Q R P V P L - E H C I Y Y G - - - - - G E L Y   |                       |                     |
| <i>Brachypodium distachyon</i>    | R T K Q K K I R V T S T N K R P V P L - E H C L F Y S - - - - - G E T Y   |                       |                     |
| <i>Oryza sativa</i>               | R T K Q K K I H V T S T N K R P V P L - E H C L F Y S - - - - - G E V F   |                       |                     |
| <i>Glycine max</i>                | R T K Q K E I R V T G T T K R P V P L - E H C L F Y S - - - - - G E L Y   |                       |                     |
| <i>Arabidopsis lyrata</i>         | R T K Q K E I R V T G T T K R P V P L - E H C L F Y S - - - - - G E L Y   |                       |                     |
| <i>Arabidopsis thaliana</i>       | R T K Q K E I R V T G T T K R P V P L - E H C L F Y S - - - - - G E L Y   |                       |                     |
|                                   | R T K K I Y V . S T                                                       | K R P V P L R E H L F | N S P K T Q G E L . |

```

520          530          540
A A N A V S R A L E R G S - - F D E L R I V V
T T E I L R S M L Y S G S D V I R D L E W V I
T T E I L R S M L Y R G A D L I R D V E F V I
T T E I L R S M L Y R G A D L I R D V E F V I
T T E I L R S M L Y S G S D V I R D L E W V I
T T E I L R S M L Y S G S D V I R D L E W V I
T T E I L R S M L Y S G S D V I R D L E W V I
T T E I L R S M L Y K G A D L I R D I E W V I
T T E I L R S M L Y S G S D V I R D L E W V I
T T E I L R S M L Y K G A D L V R D I E W V V
T T E I L R S M L Y K G A D I I R D I E W V I
T T E I L R S M L Y R G A D I I R D I E W V I
T T E I L R S M L Y R G A D I I R D I E W V I
T T E I L R S M L Y R G A D I I R D I E W V I
T T E I L R S M L Y R G A D I I R D I E W V I
T T E I L R S M L Y R G A D I I R D I E W V I
T T E I L R S M L Y R G A D I I R D I E W V I
T T E I L R S M L Y R G A D I I R D I E W V I
T T E I L R S M L Y . G A D . I R D . E W V I

```

```

580          590          600
P R I V C M S A T V N A R S L E R L A K W L D
- - I I L L S A T V P N - A L E - F A D W I G
- - F I L L S A T V P N - T Y E - F A N W I G
- - L I L L S A T V P N - T Y E - F A S W V G
- - I I L L S A T V P N - A L E - F A D W I G
- - I I L L S A T V P N - A L E - F A D W I G
- - I I L L S A T V P N - A L E - F A D W I G
- - I I L L S A T V P N - A L E - F A D W I G
- - I I L L S A T V A N - P L E - F A D W I G
- - I I L L S A T V P N - A L E - F A D W I G
- - L V L L S A T V P N - I R E - F A D W V G
- - L V L L S A T V P N - T F E - F A D W I G
- - I V L L S A T V P N - A V E - F A E W I G
- - I V L L S A T V P N - T V E - F A D W I G
- - I V L L S A T V P N - T I E - F A D W I G
- - F V L L S A T V P N - T F E - F A D W I G
- - F V L L S A T V P N - T F E - F A D W I G
P R I . L L S A T V P N R . E R F A D W I G

```

```

640          650          660
K T G - - - - - E G L T R V R D A P R A
L L L D S R G A F H T K G Y Y A V E A K K E
P V I N Q N S E F L E A N F R K H K E I L N G
K I V D S N K R F L E T G W K E A D N V I S G
L L L D S R G A F H T K G Y Y A A V E A K K E
L L L D S R G A F H T K G Y Y A A V E A K K E
L L L D S R G A F H T K G Y Y A A V E A K K E
K I V D S N R N F L M E G Y S N A Y N S L Y K
L L L D S R G A F H T K G Y Y A A V E A K K E
R I C A N E - T F L P L G V K A A K D A H L A
K I C E Q S - T F L P E G I K E A Q K A H L A
K V C E K D - M F L T Q G F R E A K D T F K M
K I C E K D - A F L T Q G Y R E A K E V F K K
K I C E S E - K F L P Q G L K A A K K E A S R
K V C E N E - V F I P K G I K D A K D S Q K K
K V C E N E - V F L S K G I K D A K D S Q K K
K . . S G F L G . . A . . K

```



|                                   | 670         | 680         | 690                 |                                                     |
|-----------------------------------|-------------|-------------|---------------------|-----------------------------------------------------|
| <i>Ostreococcus tauri</i>         | - - - - -   | - - - - -   | - - - - -           | G - - S                                             |
| <i>Canis lupus</i>                | - - - - -   | R M S K H A | Q T - - - - -       | F G A K Q P T H Q G G - - -                         |
| <i>Saccharmyces cerevisiae</i>    | - - - - -   | E S A K G A | P S K T D - - - - N | G R G G S T A R G G R G G G S N                     |
| <i>Aspergillus nidulans</i>       | R           | D K I K A   | Q K A A E A         | Q A Q S Q - - - - A Q R G G Q Q G R G - R G G Q P T |
| <i>Bos taurus</i>                 | - - - - -   | R M S K H A | Q T - - - - -       | - - - - - F G A K Q P T H Q G G - - -               |
| <i>Homo sapiens</i>               | - - - - -   | R M S K H A | Q T - - - - -       | - - - - - F G A K Q P T H Q G G - - -               |
| <i>Pan troglodytes</i>            | - - - - -   | R M S K H A | Q T - - - - -       | - - - - - F G A K Q P T H Q G G - - -               |
| <i>Dictyostelium discoideum</i>   | V           | D           | K N N D K N K K     | - - - - - - - - - - - T T G Q H G - N Q             |
| <i>Rattus norvegicus</i>          | - - - - -   | R M S K H A | Q T - - - - -       | - - - - - F G A K Q P T H Q G G - - -               |
| <i>Selaginella moellendorffii</i> | - - - - -   | K T A V K K | G P - - - - - V     | A P T Q G G R G N - V Q G R G G - P G               |
| <i>Physcomitrella patens</i>      | - - - - -   | K T T K Q A | S A G S S V         | G S A S Q G R G G G T H G R G G G P A               |
| <i>Brachypodium distachyon</i>    | - - - - -   | K N S N K L | G V - - - - - K P   | G S K S G T P A T R P G - T Q                       |
| <i>Oryza sativa</i>               | - - - - -   | K N S S K L | G M - - - - - K P   | G S K P G T T A V R A G - T Q                       |
| <i>Glycine max</i>                | - - - - -   | K K N L T A | G G - - - - - G S   | G P K P G I S P G H D K - A R                       |
| <i>Arabidopsis lyrata</i>         | - - - - -   | K T S N A V | S V - - - - - A P   | K Q Y T G S S A H Q D G - N K                       |
| <i>Arabidopsis thaliana</i>       | - - - - -   | K N S N A V | S V - - - - - A P   | K Q Q M G S S A H Q D G - S K                       |
|                                   | D K I K A K | S . A       | S V                 | G G . . G G                                         |

|                                   | 730                                                   | 740           | 750       |                                 |
|-----------------------------------|-------------------------------------------------------|---------------|-----------|---------------------------------|
| <i>Ostreococcus tauri</i>         | - - - - -                                             | - - - - -     | - - - - - | V V A E L V G E V F V           |
| <i>Canis lupus</i>                | - - - - -                                             | - - - - -     | - - - - - | V Y L S L L A S L R T           |
| <i>Saccharmyces cerevisiae</i>    | - - S R G A G A I G S N K R K - F F T Q D G P S K K T |               |           | W P E I V N Y L R K             |
| <i>Aspergillus nidulans</i>       | P A N R G T G N I A R T G R G G G R T T A A Q D K T I |               |           | W V Q L V G H L R K             |
| <i>Bos taurus</i>                 | - - - - -                                             | - - - - -     | - - - - - | V Y L S L L A S L R T           |
| <i>Homo sapiens</i>               | - - - - -                                             | - - - - -     | - - - - - | V Y L S L L A S L R T           |
| <i>Pan troglodytes</i>            | - - - - -                                             | - - - - -     | - - - - - | V Y L S L L A S L R T           |
| <i>Dictyostelium discoideum</i>   | - - - - -                                             | - - - - -     | - - - - - | W T R L I G L L K E             |
| <i>Rattus norvegicus</i>          | - - - - -                                             | - - - - -     | - - - - - | V Y L A L L A S L R T           |
| <i>Selaginella moellendorffii</i> | - - K V I P E - - - E K N S R G G - - P W             |               |           | R S E T S Q W Y G L I N V L S K |
| <i>Physcomitrella patens</i>      | T S K Q V A Q G A I Q A A M R G G G T G W             |               |           | R S E T S Q W Y T L I N N L N S |
| <i>Brachypodium distachyon</i>    | K H H H T N S G A A A I Q -                           | Q S S S G S K |           | R S E S S F W M P L I N N L L K |
| <i>Oryza sativa</i>               | K H H H A S S S A A A V Q -                           | Q S T S G P R |           | R S E S S F W M P L I N N L L K |
| <i>Glycine max</i>                | F Y G T G R G Y Q N N G N G                           | Q S N W E L R |           | R A D A S M L L M L I N K L S K |
| <i>Arabidopsis lyrata</i>         | S A K D V G K S S Y S G N S                           | Q N N G A F R |           | R S A A S N W L L L I N K L S K |
| <i>Arabidopsis thaliana</i>       | S V K D V G K S S Y S G N S                           | Q N N G A F R |           | R S A A S N W L L L I N K L S K |
|                                   |                                                       | Q             | R S       | S W . L . L                     |

|                                   | 790                                       | 800                             | 810                         |  |
|-----------------------------------|-------------------------------------------|---------------------------------|-----------------------------|--|
| <i>Ostreococcus tauri</i>         | A G - I F H R H P A A M S L R E R F V E R | L F D A C E G - - - - A P D V D |                             |  |
| <i>Canis lupus</i>                | T S - L D L T T S S E K S E I H L F L Q R | C L A R L R G S D R Q L P Q V L |                             |  |
| <i>Saccharmyces cerevisiae</i>    | E G - I N F C N N K E K S Q I H M F I E K | S I T R L K K E D R D L P Q I L |                             |  |
| <i>Aspergillus nidulans</i>       | S N - Q D F C N A S E K S L I H M F I E K | S L T R L K P E D R I L P Q I L |                             |  |
| <i>Bos taurus</i>                 | T S - L D L T T S S E K S E I H L F L Q R | C L A R L R G S D R Q L P Q V L |                             |  |
| <i>Homo sapiens</i>               | T S - L D L T T S S E K S E I H L F L Q R | C L A R L R G S D R Q L P Q V L |                             |  |
| <i>Pan troglodytes</i>            | T S - L D L T T S S E K S E I H L F L Q R | C L A R L R G S D R Q L P Q V L |                             |  |
| <i>Dictyostelium discoideum</i>   | G G H L V L T S N S E K N I I K I F I E E | S L A R L R P E D K D L P Q I H |                             |  |
| <i>Rattus norvegicus</i>          | T S - L D L T T S S E K S E I H L F L Q R | C L A R L R G S D R Q L P Q V L |                             |  |
| <i>Selaginella moellendorffii</i> | T G - S D L T T S T E K G V I R V F C N K | A F S R L K G T D R Q L P Q V L |                             |  |
| <i>Physcomitrella patens</i>      | S S - I D L T I Q S E K S E I Y M F C Q K | A F S R L K G S D R R L P Q V V |                             |  |
| <i>Brachypodium distachyon</i>    | F G - A D L T S N S D K S E I R V F C D K | A F S R L K G S D R N L P Q V V |                             |  |
| <i>Oryza sativa</i>               | F G - A D L T S N S E K S E I R L F C D K | A F S R L K G S D R N L P Q V V |                             |  |
| <i>Glycine max</i>                | T G - T D L T S S S E K S E I R L F C D K | A F S R L K G S D K N L P Q V V |                             |  |
| <i>Arabidopsis lyrata</i>         | T G - T D L T S S S E K S E I R L F C D K | A F S R L K G S D R N L P Q V L |                             |  |
| <i>Arabidopsis thaliana</i>       | T G - T D L T S S S E K S E I R V F C D K | A F S R L K G S D R N L P Q V L |                             |  |
|                                   | T G H . D L T . S S E K S E I . . F . . K |                                 | . R L K G S D R . L P Q V L |  |

```

700          710          720
E R E R E - - - L G - - - - - - - - - - - -
G P A Q D - - - R G - - - - - - - - - - - -
T R G G R G - G R G N S T R G G A N R G - G -
G R G A P - - - R G N A Q R G G A P R G R G Q
G P A Q D - - - R G - - - - - - - - - - - -
G P A Q D - - - R G - - - - - - - - - - - -
G P A Q D - - - R G - - - - - - - - - - - -
A S F A S V S K T G - - - - - - - - - - - -
G P A Q D - - - R G - - - - - - - - - - - -
G R G G - - - R G - - N - - - - - - - - - -
G R G G S M P G R G G D N Q G K V G G R K G P
G R N P D T S S R G K D Q - - - - - - K H P
G R N P D T S S R G R D Q - - - - - - K N P
V Q K R E N T S H T K H H - - - - - - G A N
S Q K H E A H S R G K Q N - - - - - - K H S
S Q K H E A H S R G K Q N - - - - - - K H S
G . . S R G R G G A R G K
    
```

```

760          770          780
H G - H S T L V F C A S K A Q C S N V A K R L
R A Q L P V V V F T F S R G R C D E Q A S G L
R E L L P M V V F V F S K K R C E E Y A D W L
E N L L P G C I F V F S K K R C E E N A D S L
R A Q L P V V V F T F S R G R C D E Q A S G L
R A Q L P V V V F T F S R G R C D E Q A S G L
R A Q L P V V V F T F S R G R C D E Q A S G L
K Q Q L P V I V F S F S K N K C Q E Y A Q S L
R A Q L P V V V F T F S R G R C D E Q A S G L
K N L L P V V V F C F S K S R C D Q S A D S L
K G L L P V V V F C F S K N R C D Q S A D S L
K S L V P V V I F C F S K N R C D R S A D S M
K S L V P V V I F C F S K N R C D R S A E S M
K S L L P V V I F C F S K N R C D K S A D S L
K S L L P V V V F C F S K N Y C D R C A D A L
M S L L P V V V F C F S K N Y C D R C A D A L
. L L P V V V F F S K R C D A . L
    
```

```

820          830          840
L V Q A I L S - G I A W H H A G L T T A E K N
H M S E L L H R G L G V H H S G I L P I L K E
K T R S L L E R G I A V H H G G L L P I V K E
R L R E L L S R G I A V H H G G L L P I M K E
H M S E L L H R G L G V H H S G I L P I L K E
Q M S E L L N R G L G V H H S G I L P I L K E
H M S E L L N R G L G V H H S G I L P I L K E
Q I K D F L E R G I G I H H G G L L P I V K E
H M S E L L R R G L G V H H S G I L P I L K E
R I E E L L K R G I G V H H A G L L P I V K E
R V Q E L L K R G I G V H H A G L L P I V K E
G I Q S L L R R G I G V H H A G L L P I V K E
G I Q S L L R R G I G V H H A G L L P I V K E
R V Q N L L R R G I G V H H A G L L P I V K E
R V Q S L L H R G I G V H H A G L L P I V K E
R L Q S L L H R G I G V H H A G L L P I V K E
. . . L L . R G I G V H H . G L L P I V K E
    
```

|                                   |                 |                   |                             |             |         |         |       |
|-----------------------------------|-----------------|-------------------|-----------------------------|-------------|---------|---------|-------|
|                                   |                 | 850               |                             | 860         |         | 870     |       |
| <i>Ostreococcus tauri</i>         | V I E E G F R D | G A I L A L T C   | T T T L A A                 | G V N L P T | R R     | - - - - | T I - |
| <i>Canis lupus</i>                | I V E M L F S   | R G L V K V L F A | T E T F A M G V N M         | P A R T     | - - - - | - - - - | V V F |
| <i>Saccharmyces cerevisiae</i>    | L I E I L F S   | K G F I K V L F A | T E T F A M G L N L P T     | R T         | - - - - | - - - - | V I F |
| <i>Aspergillus nidulans</i>       | I V E I L F A   | K S L V K I L F A | T E T F A M G L N L P T     | R T         | - - - - | - - - - | V V F |
| <i>Bos taurus</i>                 | I V E M L F S   | R G L V K V L F A | T E T F A M G V N M         | P A R T     | - - - - | - - - - | V V F |
| <i>Homo sapiens</i>               | I V E M L F S   | R G L V K V L F A | T E T F A M G V N M         | P A R T     | - - - - | - - - - | V V F |
| <i>Pan troglodytes</i>            | I V E M L F S   | R G L V K V L F A | T E T F A M G V N M         | P A R T     | - - - - | - - - - | V V F |
| <i>Dictyostelium discoideum</i>   | L V E I L F S   | K S L V K V L F A | T E T F A M G V N M         | P A K T     | - - - - | - - - - | V V Y |
| <i>Rattus norvegicus</i>          | I V E M L F S   | R G L V K V L F A | T E T F A M G V N M         | P A R T     | - - - - | - - - - | V V F |
| <i>Selaginella moellendorffii</i> | V V E M L F C   | R G V I K V L F S | T E T F A M G V N A P A R T | - - - -     | - - - - | - - - - | V A F |
| <i>Physcomitrella patens</i>      | V V E M L F C   | R G V I K V L F S | T E T F A M G V N A P A R T | - - - -     | - - - - | - - - - | V A F |
| <i>Brachypodium distachyon</i>    | V V E M L F C   | R G V I K V L F S | T E T F A M G V N A P A R T | - - - -     | - - - - | - - - - | V V F |
| <i>Oryza sativa</i>               | V V E M L F C   | R G V I K V L F S | T E T F A M G V N A P A R T | L K D L     | - - - - | - - - - | V V F |
| <i>Glycine max</i>                | V V E M L F C   | R G V I K V L F S | T E T F A M G V N A P A R T | - - - -     | - - - - | - - - - | V V F |
| <i>Arabidopsis lyrata</i>         | V V E M L F C   | R G V I K V L F S | T E T F A M G V N A P A R T | - - - -     | - - - - | - - - - | V V F |
| <i>Arabidopsis thaliana</i>       | V V E M L F C   | R G V I K V L F S | T E T F A M G V N A P A R T | - - - -     | - - - - | - - - - | V V F |
|                                   | . V E M L F     | R G . I K V L F   | T E T F A M G V N . P A R T | L K D L     | V V F   |         |       |

|                                   |                   |                 |                       |                 |       |     |  |
|-----------------------------------|-------------------|-----------------|-----------------------|-----------------|-------|-----|--|
|                                   |                   | 910             |                       | 920             |       | 930 |  |
| <i>Ostreococcus tauri</i>         | G R A G R K G Q   | S D V G E S F L | I V M K - - - K D A V | A W A Q N L V C | G D   |     |  |
| <i>Canis lupus</i>                | G R A G R R G L D | P T G T V I L L | C K G - - R V P E M   | A D L H R M M M | G K   |     |  |
| <i>Saccharmyces cerevisiae</i>    | G R A G R R G L D | S T G T V I V M | A Y N - - S P L S I   | A T F K E V T M | G V   |     |  |
| <i>Aspergillus nidulans</i>       | G R A G R R G L D | T V G Y V I I V | S A G R D E A P P A   | G A L R K M I L | G D   |     |  |
| <i>Bos taurus</i>                 | G R A G R R G L D | P T G T V I L L | C K G - - R V P E M   | A D L H R M M M | G K   |     |  |
| <i>Homo sapiens</i>               | G R A G R R G L D | P T G T V I L L | C K G - - R V P E M   | A D L H R M M M | G K   |     |  |
| <i>Pan troglodytes</i>            | G R A G R R G L D | P T G T V I L L | C K G - - R V P E M   | A D L H R M M M | G K   |     |  |
| <i>Dictyostelium discoideum</i>   | G R A G R R G L D | K V G T V I I T | A W K - - D M P D     | S S S Y S S M I | L G Q |     |  |
| <i>Rattus norvegicus</i>          | G R A G R R G L D | P T G T V I L L | C K G - - R V P E M   | A D L H R M M M | G K   |     |  |
| <i>Selaginella moellendorffii</i> | G R A G R R G L D | T V G T V I V M | C W D - - D I P D     | E G D L R R L L | T G K |     |  |
| <i>Physcomitrella patens</i>      | G R A G R R G L D | K V G T V V I M | C W D - - D I P E     | E G D L K R L L | T G R |     |  |
| <i>Brachypodium distachyon</i>    | G R A G R R G L D | T I G T V M I M | C R D - - E I P E     | E S D L K N L I | V G K |     |  |
| <i>Oryza sativa</i>               | G R A G R R G L D | N I G T V I V M | C R D - - E I P E     | E S D L K N L I | V G K |     |  |
| <i>Glycine max</i>                | G R A G R R G L D | K I G T V I L M | C R D - - E L P E     | E S D L E P V I | V G S |     |  |
| <i>Arabidopsis lyrata</i>         | G R A G R R G L D | K T G T V V V M | C R D - - E V P D     | E S D L R R V I | V G S |     |  |
| <i>Arabidopsis thaliana</i>       | G R A G R R G L D | K T G T V V V M | C R D - - E V P D     | E S D L R R V I | V G S |     |  |
|                                   | G R A G R R G L D | G T V I .       | C . R D . . P E       | . D L . R . .   | G .   |     |  |

|                                   |                       |             |                     |                     |             |         |  |
|-----------------------------------|-----------------------|-------------|---------------------|---------------------|-------------|---------|--|
|                                   |                       | 970         |                     | 980                 |             | 990     |  |
| <i>Ostreococcus tauri</i>         | A P P T A E Q         | K K F Y L   | E S I A C G I L     | K T K E D A G       | E - - - -   | - - - - |  |
| <i>Canis lupus</i>                | L R V E D M M         | K R S F S   | E F P S R K         | D S K A H E Q A L   | D E L T K R | L G A L |  |
| <i>Saccharmyces cerevisiae</i>    | L R V E E M I K Y     | S F S       | E N A K E T L Q     | P E H E K Q I       | K V L Q E E | L Q T I |  |
| <i>Aspergillus nidulans</i>       | L K I E E M I K R S F | S E N A T Q | A L L P E H E K Q V | Q L S E A S         | L A K I     |         |  |
| <i>Bos taurus</i>                 | L R V E D M M         | K R S F S   | E F P S R K         | D S K A H E Q A L   | A E L T K K | L G A L |  |
| <i>Homo sapiens</i>               | L R V E D M M         | K R S F S   | E F P S R K         | D S K A H E Q A L   | A E L T K R | L G A L |  |
| <i>Pan troglodytes</i>            | L R V E D M M         | K R S F S   | E F P S R K         | D S K A H E Q A L   | A E L T K K | L G A L |  |
| <i>Dictyostelium discoideum</i>   | F K V E D M I K R S F | S E F S T Q | K D I P E L Q K A I | E S L S I E Y Q A I |             |         |  |
| <i>Rattus norvegicus</i>          | L R V E D M M         | K R S F S   | E F P S R K         | D S K A H E Q A L   | A D L T K R | L G A L |  |
| <i>Selaginella moellendorffii</i> | L K V E D M L K R S F | A E F H A Q | R A L P E Q Q Q Q   | L L R Q E G E       | L S K M     |         |  |
| <i>Physcomitrella patens</i>      | L K V E D M L K R S F | A E F H A Q | R S L P E Q Q Q Q   | L L E R E G A       | L S K M     |         |  |
| <i>Brachypodium distachyon</i>    | L K V E D M L K R S F | A E F H A Q | K K L P E K E E     | L L L Q M L R Q P T | K -         |         |  |
| <i>Oryza sativa</i>               | L K V E D M L K R S F | A E F H A Q | K N L P E K E K     | L L L Q M L R Q P T | K -         |         |  |
| <i>Glycine max</i>                | L K V E D M L K R S F | A E F H A Q | K K L P E M Q Q     | L L K R K L N Q P T | K -         |         |  |
| <i>Arabidopsis lyrata</i>         | L K V E D M L K R S F | A E F H A Q | K K L P E K Q Q     | L L M R K R S L P I | K N         |         |  |
| <i>Arabidopsis thaliana</i>       | L K V E D M L K R S F | A E F H A Q | K K L P E K Q Q     | L L M I K R S L P T | K -         |         |  |
|                                   | L K V E D M . K R S F | E F         | Q K                 | L P E . E Q . L     |             | L K     |  |

880 890 900

```

- - I I P G Y I A G T R T P S M A Q Y K Q M A
D S M R R K H D G S T F R D L L P G E Y V Q M A
S S I R R K H D G N G L R E L T P G E F T Q M A
S G F R R K H D G R G F R D L L P G E Y T Q M A
D S M R R K H D G S T F R D L L P G E Y V Q M A
D S M R R K H D G S T F R D L L P G E Y V Q M A
D S M R R K H D G S T F R D L L P G E Y V Q M A
S H T R R K H D G I N F R D L L P G E Y T Q M S
D S M R R K H D G S T F R D L L P G E Y V Q M A
H G F R R K H D G K S F R Q L Y P G E Y T Q M A
H S L R R K H D G K T F R Q I L S G E Y T Q M A
D S L R K F D G K E H R K L L P G E Y I Q M A
D S L R K F D G K E H R K L L P G E Y I Q M A
D T L R K F D G K E F R Q L L A G E Y T Q M A
D A L R K F D G K E F R Q L L P G E Y T Q M A
D A L R K F D G K E F R Q L L P G E Y T Q M A
D S R R K H D G F R L L P G E Y Q M A
    
```

940 950 960

```

L P P L E S R L F P P S - - - - - R G R D
P S Q L Q S Q F R L T Y T M I L N L L R V D A
P T R L Q S Q F R L T Y N M I L N L L R I E A
P T K L R S Q F R L T Y N M I L N L L R V E A
P S Q L Q S Q F R L T Y T M I L N L L R V D A
P S Q L Q S Q F R L T Y T M I L N L L R V D A
P S Q L Q S Q F R L T Y T M I L N L L R V D A
P S K L N S Q F R L T Y N M I L N L L R V Q D
P S Q L Q S Q F R L T Y T M I L N L L R V D A
A T K L E S Q F R L T Y T M I L N L L R V E E
P T K L E S Q F R L T Y S M I L N L L R V E D
P T R L E S Q F R L T Y T M I L H L L R V E E
P T R L E S Q F R L T Y T M I L H L L R V E E
A T R L E S Q F R L T Y I M I L H L L R V E E
A T R L E S Q F R L T Y I M I L H L L R V E E
A T R L E S Q F R L T Y I M I L H L L R V E E
P T . L S Q F R L T Y T M I L N L L R V E .
    
```

1000 1010 1020

```

- - - - - L A C R T F A W T S E D D Y
E - - - - - E P D T T G Q L V D L S E Y Y
E - - - - - Y K S C E I C D N D I E K F L
K - - - - - R E P C D I C D I D L V A C H
E - - - - - E P E V T G Q L V D L P E Y Y
E - - - - - E P D M T G Q L V D L P E Y Y
E - - - - - E P D M T G Q L V D L P E Y Y
E P - - - - - I Q C I L G E P D I E N Y Y
E - - - - - E P D V T G Q L A D L P E Y Y
A - - - - - A T I E C I L G D P T I E D Y Y
N - - - - - V Q I N C I L G E P S I E D Y F
- - - - - T I E C I K G E P S I E E Y Y
- - - - - T I E C I K G E P A I E E Y Y
- - - - - A I E C L K G E P T I E E Y Y
I E A D L L I Y S S R C I K G E P A I E D Y Y
- - - - - H I E C I K G E P A I E D Y Y
E A D L L I . C . . I E . Y Y
    
```

|                                   | 1030                                                                      | 1040 | 1050 |
|-----------------------------------|---------------------------------------------------------------------------|------|------|
| <i>Ostreococcus tauri</i>         | S S I L L R Q E V S - - - - - - - - - - L K Q I H D E G V V M V R R T     |      |      |
| <i>Canis lupus</i>                | G W G E E L T E T R S L I Q R R I M E S V N G L K S L S A G R V V V V K N |      |      |
| <i>Saccharmyces cerevisiae</i>    | E L M L A Y K E A T V N L M Q E M V K S P S I L H I L K E G R L V A F R D |      |      |
| <i>Aspergillus nidulans</i>       | D A A I E Y E K L T S E L H V G L L A S P V G K R L F M P K R L V V Y R K |      |      |
| <i>Bos taurus</i>                 | S W G E E L T E T R S Q I Q H R I I E S V N G L K S L S A G R V V V V K N |      |      |
| <i>Homo sapiens</i>               | S W G E E L T E T Q H M I Q R R I M E S V N G L K S L S A G R V V V V K N |      |      |
| <i>Pan troglodytes</i>            | S W G E E L T E T Q H M I Q R R I M E S V N G L K S L S A G R V V V V K N |      |      |
| <i>Dictyostelium discoideum</i>   | N M F S E A Q V L N E N V Q R T I L S S - N N Q Q Y F G D G R V I V L S I |      |      |
| <i>Rattus norvegicus</i>          | S W A E E L T E T R N M I Q R R I M E S V N G L K S L S V G R V V V V K N |      |      |
| <i>Selaginella moellendorffii</i> | K L A S E A D M L G E S I Q E K V M N S R A A Q Q A L I P G R I V T V K T |      |      |
| <i>Physcomitrella patens</i>      | S V Y L E Y D K L G D K I Q E A V M Q S R G G Q Q A L V A G R V V L V R N |      |      |
| <i>Brachypodium distachyon</i>    | D M F L E A E K L R E Y I T E A I M Q L P A S Q Q F L G P G R L V V V E S |      |      |
| <i>Oryza sativa</i>               | E M V L E A E A H R E S I T E A I M Q L P A S Q Q S L T P G R L V V V K S |      |      |
| <i>Glycine max</i>                | D L Y L E A E T Y S N Q I S E A I L Q S P S A Q Q F L N T G R V V I V K S |      |      |
| <i>Arabidopsis lyrata</i>         | D M Y M E A N E Y N N K M S E A V M Q S P Y A Q N F L V P G R V V V M K S |      |      |
| <i>Arabidopsis thaliana</i>       | D M Y M E A N E Y N N K M S E A V M Q S P Y A Q S F L V Q G R V V V M K S |      |      |
|                                   | . E . E I Q I M S . L G R V V V V K                                       |      |      |

|                                   | 1090                                                                        | 1100 | 1110 |
|-----------------------------------|-----------------------------------------------------------------------------|------|------|
| <i>Ostreococcus tauri</i>         | Y R C S L P I A H A K K L R - - - - - - - - - - - - - - - - - - - - - -     |      |      |
| <i>Canis lupus</i>                | R V F T T L V L C D K P V S - - - - - - - - - - - E D P Q E R A P A T P D   |      |      |
| <i>Saccharmyces cerevisiae</i>    | C V I M T F T K P Y K L P N G - - - - - - - - - - - - - - - E P N H L I Y   |      |      |
| <i>Aspergillus nidulans</i>       | T P N I Q V L E I G K L S H R R - - - - - - - - - - - H P S D I L P F       |      |      |
| <i>Bos taurus</i>                 | R V F T A L V L C D K P V S - - - - - - - - - - - E D P R E R G P A S P D   |      |      |
| <i>Homo sapiens</i>               | R V F T T L V L C D K P L S - - - - - - - - - - - Q D P Q D R G P A T A E   |      |      |
| <i>Pan troglodytes</i>            | R V F T T L V L C D K P L S - - - - - - - - - - - Q D P Q D R G P A T A E   |      |      |
| <i>Dictyostelium discoideum</i>   | Q Y L N S T I E R T F N I F S - - - - - - - - - - - - - - - - - - - - - -   |      |      |
| <i>Rattus norvegicus</i>          | R V F T T L V L C D K P A V S - - - - - - - - - - - E N P R D K G P A T P D |      |      |
| <i>Selaginella moellendorffii</i> | M S I V L T L Y R G A V P A S - - - - - - A K L Q P P T K K L D Q D G G Y   |      |      |
| <i>Physcomitrella patens</i>      | L P I V L A I H R A P L P A T R G N P G L A A V T K A T N E L A K A G - Y   |      |      |
| <i>Brachypodium distachyon</i>    | Q Y V V F V L T G E C T S S A L A P N L S N Q N D N A Q G E V Q Q G Y M V   |      |      |
| <i>Oryza sativa</i>               | Q Y V V L V L T G D C T S S A L A P D S S N Q N E K E A G D F K Q G Y F V   |      |      |
| <i>Glycine max</i>                | M Y I V F V I K P D M P S S V D N A S S S G N M Q N K S G A F D Q G Y F V   |      |      |
| <i>Arabidopsis lyrata</i>         | Q Y V V L V T K S E I P P P E K N M V S I G - - - K K S S E P S Q G Y F I   |      |      |
| <i>Arabidopsis thaliana</i>       | Q Y V V L V I K S E I P P P E K N M V S I G - - - K K S S D P S Q G Y F I   |      |      |
|                                   | . . . S . . .                                                               |      |      |

|                                   | 1150                                                                      | 1160 | 1170 |
|-----------------------------------|---------------------------------------------------------------------------|------|------|
| <i>Ostreococcus tauri</i>         | - - - - - S E L D D A L R N G L N L T S R T H L L F F C I S N - - - -     |      |      |
| <i>Canis lupus</i>                | C D H T V A K L Q P G D V A T I T T K V L R V N G E K I L E D F S - - - K |      |      |
| <i>Saccharmyces cerevisiae</i>    | - - - - - R N F P K F Q K T D F Y M E E V P V T A I E V I T K R K F A     |      |      |
| <i>Aspergillus nidulans</i>       | - - - - - P L P T R A A D M T L K V C K I P L S D L E C V T N T I V K     |      |      |
| <i>Bos taurus</i>                 | C D H T V A K L Q P G D V A A I T T K V L R L N G D K I L E D F S - - - K |      |      |
| <i>Homo sapiens</i>               | C D H T V V K L Q P G D M A A I T T K V L R V N G E K I L E D F S - - - K |      |      |
| <i>Pan troglodytes</i>            | C D H T V V K L Q P G D M A A I T T K V L R V N G E K I L E D F S - - - K |      |      |
| <i>Dictyostelium discoideum</i>   | - - - - - L E L D Q E H G L R G Y K I Y S S N G H E I Q R I C T E K I V   |      |      |
| <i>Rattus norvegicus</i>          | C E H T V A K L Q P G D V A A I S T K V L R V N G E K I S E D F S - - - K |      |      |
| <i>Selaginella moellendorffii</i> | G V I R L T M P H Y G T V G G V S F L V A E T S G Q E F L S I S K E K I R |      |      |
| <i>Physcomitrella patens</i>      | G V M K I S L P H Y G T A A G F G Y V V M E V D N Q G F L S L C K A K I R |      |      |
| <i>Brachypodium distachyon</i>    | G V I K I K L P H K G D A S G M G F E V R A V E N K E I V S I C T S K I K |      |      |
| <i>Oryza sativa</i>               | G V I N I K L P Y K G D A S G M G F E V R A I E N K E I M N I C A S K I K |      |      |
| <i>Glycine max</i>                | G V I T I R L P Y S G S A C G M G Y E V R E V D S K E F L C I C S S K I K |      |      |
| <i>Arabidopsis lyrata</i>         | V V I K I E L P Y H G V A A G V G Y E A K G F D N K E F L C I C D S K I K |      |      |
| <i>Arabidopsis thaliana</i>       | V V I K I E L P Y H G V A A G V G Y E V K G F D N K E F L C I C D S K I K |      |      |
|                                   | V . L G . . A . . V . . I L I K I K                                       |      |      |

1060 1070 1080

```

G - - - - E N S T E W C S T - - P E G F A F
Q - - - - E Y H N T L G V I L Q V S S N S A S
P - - - - N D C L K L G F V F K V S L K D A V
- - - - D G F R T A G I I V R E G V G G G A
Q - - - - E H H N A L G V I L Q V S S N S T S
Q - - - - E H H N A L G V I L Q V S S N S T S
Q - - - - E H H N A L G V I L Q V S S N S T S
G D D M T F K N Y T I G V I L S C N N T I Q K
E - - - - E H H N A L G V I L Q V S S N S T S
T I - - - Y P V P A L G V V L R G P S G T T K
S I - - - V P V P T L G V I V R A A T G N T K
K S - - - D D D H L L G V I V K N P S G S L K
Q S - - - D D D H L L G V I V K T P S A A L K
E S - - - A Q D H L L G V V V E T P S P T N K
G T - - - G I D N L L G V V L K G P S N T N R
G M - - - G I D N L L G I V L K G P S N T N R
D M T . L G V I L . S .
    
```

1120 1130 1140

```

- - - - - - - - - - - - - - - - - - - - - -
V P Y P D D L V G F K L F L P - - - - E G P
F P - - - - - K A D G Y R R - - - - -
L P - - - - - R F R H L L H - - - - -
V P Y P D D L V G F K L F L P - - - - E G P
V P Y P D D L V G F K L F L P - - - - E G P
V A Y P D D L V G F K L F L P - - - - E G P
- - - - - - - - - - - - - - - - - - - - - -
V P H P D D L V G F K L F L P - - - - E G P
F I S K K N K N D D D E F A V F S G S K K S S
F I S K K G G D N G D D F F M G I G S R K G T
I P P K G K R G M D D E F F S A G S T R K S S
I P - K G K R S M E D E Y F S S V S T R K G S
M P - K S R R V V V D E Y S T S V S A R K G K
A P - K S K R G F E E E F Y T K P S S R K G S
A P - K S K R G F E E E F Y T K P S S R K G P
. P K . F S S R K G
    
```

1180 1190 1200

```

- E S N F L A N N L N W H V W S D W L E H D S
R Q Q P K F K K D P P I A A V T T A V Q E L L
A P - - - L G K V I K K D V A A L N E F N A
V G G P T W Y L N I K K E A I K F A D K E L S
R Q Q P K F K K D P P S A A V T T A V Q E L L
R Q Q P K F K K D P P L A A V T T A V Q E L L
R Q Q P K F K K D P P L A A V T T A V Q E L L
N I N T K A I K D G D Q D S I G I L Q Q Q L L
R Q Q P K F R K D P P L A A V T T A V Q E L L
V D A N R I L E E E S T M A I S A V L Q A L T
V D S A R L L E D N S P A A Y T S T M K E L L
I D Q F R L L E E P S K T V Y S T T V Q L L I
I D Q V R L L E D P S K T V Y S K T V Q M L I
I D R V G L L E D I S S S V Y S K T V Q L L M
I D Q V R L L E D G N K S A F S Q T V Q Q L L
I D Q V R L L E D G N K A A F S Q T V Q Q L L
. Q . . . D A . . . V Q L L
    
```

|                                   | 1210                          | 1220                        | 1230                |         |
|-----------------------------------|-------------------------------|-----------------------------|---------------------|---------|
| <i>Ostreococcus tauri</i>         | V L H Q L G E - - - - - K H L | G V T R - - - - E Y         | A E H A Q Y R L G   |         |
| <i>Canis lupus</i>                | R L A Q A Y P - A G - P P T   | L D P V N D L Q L K D V S   | V V E G G L R A R K |         |
| <i>Saccharmyces cerevisiae</i>    | E T N N I L D - - - - G K T   | L K E A I N I E K Q G L K   | I H Q I L L D R T N |         |
| <i>Aspergillus nidulans</i>       | K L C A S W T - - - - S P I   | W D E M D W A R I K E L Q   | V R D I L E K R Q A |         |
| <i>Bos taurus</i>                 | R L A Q A H P - T G - P P T   | L D P V N D L Q L K D V S   | V V E G G L R A R K |         |
| <i>Homo sapiens</i>               | R L A Q A H P - A G - P P T   | L D P V N D L Q L K D M S   | V V E G G L R A R K |         |
| <i>Pan troglodytes</i>            | R L A Q A H P - A G - P P T   | L D P V N D L Q L K D M S   | V V E G G L R A R K |         |
| <i>Dictyostelium discoideum</i>   | R L L E K Y P L P L G P P S   | I D P I S K L K L R S I E   | F V D Q F D K L Q N |         |
| <i>Rattus norvegicus</i>          | R L A Q A Y P - A G - P P T   | L D P I N D L Q L K D V A   | V V E G G L R A R K |         |
| <i>Selaginella moellendorffii</i> | E L E R L Y P - A D - P P P   | L D P V K D L K L N D I D   | A V E K Y K K K Q A |         |
| <i>Physcomitrella patens</i>      | Q L E K E Y P G Q D - P P A   | L D L L K D L K F T D F G   | V V E A Y R K Q Q A |         |
| <i>Brachypodium distachyon</i>    | K A Q P D G H - K Y - P P A   | L D P I K D L K M K D M D Q | V Q K Y H A Y N R   |         |
| <i>Oryza sativa</i>               | K E Q P D G N - K Y - P A A   | L D A I K D L K M K D M L   | L V E N Y Y A Y Q R |         |
| <i>Glycine max</i>                | D L K S D G N - K Y - P P A   | L D P V K D L K L R D V K   | L V A T Y H K W T R |         |
| <i>Arabidopsis lyrata</i>         | D L K S D G N - K Y - P P P   | L D P I K D L K L K D A E S | V E T Y Y K W T S   |         |
| <i>Arabidopsis thaliana</i>       | D L K S D G N - K F - P P A   | L D P V K D L K L K D A E   | L V E T Y Y K W T N |         |
|                                   | . L                           | G P P L D P .               | D L . L K D .       | . V E . |

|                                   | 1270                      | 1280                          | 1290                    |  |
|-----------------------------------|---------------------------|-------------------------------|-------------------------|--|
| <i>Ostreococcus tauri</i>         | - - - - - E L L A N D     | D T I F D I E Q K W S - - - - | L M S                   |  |
| <i>Canis lupus</i>                | R E R M Q I Q K E M E R   | L R F L L S D Q S L L L L     | P E Y H Q R V E V L R T |  |
| <i>Saccharmyces cerevisiae</i>    | F K A H V I K K K I E E   | L Y H L M S D Q N L S L L     | P D Y E K R L A V L K D |  |
| <i>Aspergillus nidulans</i>       | H D E W Q V K E N I S Q   | L K Q L M S D Q N L Q L L     | P D Y E Q R I Q V L R D |  |
| <i>Bos taurus</i>                 | R E R M Q I Q K E M E R   | L R F L L S D Q S L L L L     | P E Y H Q R V E V L R T |  |
| <i>Homo sapiens</i>               | R E R M Q I Q K E M E R   | L R F L L S D Q S L L L F     | P E Y H Q R V E V L R T |  |
| <i>Pan troglodytes</i>            | R E R M Q I Q K E M E R   | L R F L L S D Q S L L L L     | P E Y H Q R V E V L R T |  |
| <i>Dictyostelium discoideum</i>   | K H K H D I K T K M N E Y | K H T S S D E N L Q L M       | P E F Q I R L K I L E T |  |
| <i>Rattus norvegicus</i>          | Q E R M Q I Q K E M E R   | L R F L L S D Q S L L L L     | P E Y H Q R V E V L R T |  |
| <i>Selaginella moellendorffii</i> | K N R Q L L R D R V D K   | L K F D V S D N A L Q Q M     | P E F Q R R M D V L Q D |  |
| <i>Physcomitrella patens</i>      | K N Q H I L K E R V S Q   | L K Y E L S D A A L Q Q M     | P D F G K R I E V L Q A |  |
| <i>Brachypodium distachyon</i>    | K E Q K V Y K T Q M D E   | L K Y Q M S D E A L Q Q M     | P Q F Q G R I D V L K E |  |
| <i>Oryza sativa</i>               | K E Q K V Y K D Q L N D   | L K Y E M S D E A L Q Q M     | P E F Q G R I D V L K E |  |
| <i>Glycine max</i>                | K E I K K H K E E V Y A   | L Q F Q M S D E A L K Q M     | P D F Q G R I D V L K Q |  |
| <i>Arabidopsis lyrata</i>         | R E I K K H K T D L K D   | L E F Q M S D E A L L Q M     | P A F Q G R I D V L K N |  |
| <i>Arabidopsis thaliana</i>       | R E I K K H K T D L K D   | L E F Q M S D E A L L Q M     | P A F Q G R I D V L K N |  |
|                                   | . E . K                   | L . F S D L                   | P . . R . . V L .       |  |

|                                   | 1330                    | 1340                                  | 1350              |  |
|-----------------------------------|-------------------------|---------------------------------------|-------------------|--|
| <i>Ostreococcus tauri</i>         | A T T A G M A S V L A N | - - - - - E C G W S A L A G L M L N   | - - - - -         |  |
| <i>Canis lupus</i>                | H E L L L T E L M F D N | A L S A L R P E E I A A L L S G L V C | Q S P G - -       |  |
| <i>Saccharmyces cerevisiae</i>    | Y E L V L T E L I L D N | F L G S F E P E E I V A L L S V F V Y | E G K T R E       |  |
| <i>Aspergillus nidulans</i>       | D E L V L T E L I L E N | V L A E Y E P E E I V A L L S A F V F | Q E K T - -       |  |
| <i>Bos taurus</i>                 | H E L L L T E L M F D N | A L S T L R P E E I A A L L S G L V C | Q S P G - -       |  |
| <i>Homo sapiens</i>               | H E L L L T E L M F D N | A L S T L R P E E I A A L L S G L V C | Q S P G - -       |  |
| <i>Pan troglodytes</i>            | H E L L L T E L M F D N | A L S T L R P E D I V A L L S G L V C | Q S P G - -       |  |
| <i>Dictyostelium discoideum</i>   | E E L I I P E L I F E N | A F L M L E P S E I V S V L S C       | L I F Q E K D - - |  |
| <i>Rattus norvegicus</i>          | H E L L L T E L M F D N | A L S A L R P E E I A A L L S G L V C | Q S P G - -       |  |
| <i>Selaginella moellendorffii</i> | D E L I A A E C L F D N | Q L A D L N A A E S I A L L S S L V F | Q Q R E - -       |  |
| <i>Physcomitrella patens</i>      | D E L I A T E C L F D N | Q L G D L T P A E A V A L L S S L V F | Q Q K D - -       |  |
| <i>Brachypodium distachyon</i>    | E E L I S T E C L F E N | Q L D D L E P E E A V A I M S A F V F | Q Q R N - -       |  |
| <i>Oryza sativa</i>               | E E L I S T E C L F E N | Q L D D L E P E E A V A I M S A L V F | Q Q R N - -       |  |
| <i>Glycine max</i>                | E E L I C T E C L F E N | Q M D E L E P E E A V A I M S A F V F | Q Q K N - -       |  |
| <i>Arabidopsis lyrata</i>         | E E L I C T V C L F E N | Q F E E L E P E E A V A I M S A F V F | Q Q K N - -       |  |
| <i>Arabidopsis thaliana</i>       | E E L I C T V C L F E N | Q F E E L E P E E A V A I M S A F V F | Q Q K N - -       |  |
|                                   | . E L . . T E . F . N L | L E P E E . V A L L S . L V F Q       | . R E             |  |

1240 1250 1260  
V S A E S R A V R S R H E R L A A A H L L S -  
L E E L I W G A Q C V H S P R F S A Q Y V K L  
I R D E I F K L K S I K C P N L S Q H I V P K  
Q A A I T Q S C R C L Q C P S F M K H F E M Q  
L E E L I R G A Q C V H S P R F P A Q Y L K L  
L E E L I Q G A Q C V H S P R F P A Q Y L K L  
L E E L I Q G A Q C V H S P R F P A Q Y L K L  
I Q K L I P T S K C N N C P K L S N H Y T I T  
L E E L I R G A Q C V H S P R F P A Q Y V K L  
I T E L M A Q N K C H R C P K L Q E H Y S I I  
L L E I M A Q N K C H K C P K L Q E H Y T L V  
L L E K M S E N K C H G C I K L K E H K S L M  
L L Q K M S E N K C H G C I K L K E H I A L M  
L L E K M S Q N Q C H G C I K L E E H L K L A  
L L Q K M S M N K C H G C V K L E E H M K L A  
L L Q K M S M N K C H G C V K L E E H M K L A  
L E . . C . C P . L H . .

1300 1310 1320  
N G A I D - - - - - R G K I Q S L Q N M A  
L G Y V D E A G T V K L A G R V A C A M S S -  
T E F I D Q N H N V L L K G R V A C E I N S G  
L G F I D E Q S R V Q L K G K V A C E I H S A  
L G Y V D E A G T V K L A G R V A C A M S S -  
L G Y V D E A G T V K L A G R V A C A M S S -  
L G Y V D E A G T V K L A G R V A C A M S S -  
L G Y I D G E N N V M V K G K V S R E V N T C  
L G Y V D E A G T V K L A G R V A C A M S S -  
V G C I D S E L I V Q L K G R V T C E F N T G  
V E C I D A E L V V Q L K G R V A C E L N S C  
I Q Y V D S D L V V Q L K G R V A C E M N S G  
I H Y I D S D L V V Q L K G R V A C E M N S G  
I G C I D E D L V V Q M K G R V A C E M N S G  
I G C I D D D L V V Q I K G R V A C E M N S G  
I G C I D D D L V V Q I K G R V A C E M N S G  
. G . I D . . V Q L K G R V A C E M N S G

1360 1370 1380  
- - - - - V S E E L Q A G A R R E L L P L M R  
D P G E Q L P S T L K Q G V E R V R A V A R R  
E E P P I V T P R L A K G K Q R I E E I Y K K  
E N V P T L T P R L E K G K E A I I R I A E K  
D P G D Q L P S T L K Q G V E R V R T V A K R  
D A G D Q L P N T L K Q G I E R V R A V A K R  
D A G D Q L P N T L K Q G I E R V R A V A K R  
A I E P S L T P R L I Q A R D N L I K I N E K  
D P G D Q L P S T L K Q G V E R V K A V A K R  
T S E P V L T E K L A A A K T R R L Y N T A L Q  
A S E P V L T E R L E Q A R D R R L Y H T A I R  
A S E P S L T P K L A D A K K R R L Y D T A I R  
T S E P S L T P K L A D A R K R I Y D T A I R  
T S E P S L T P K L S E A K H R R L Y Q T A I R  
T S A P S L T S K L A K A K Q R L Y D T A I R  
T S A P T L T P K L A K A K Q R L Y D T A I R  
P L T . L . . R . A R



|                                   | 1390                                                                      | 1400    | 1410                          |
|-----------------------------------|---------------------------------------------------------------------------|---------|-------------------------------|
| <i>Ostreococcus tauri</i>         | L D G M T G A R A R S - - - - - L Y N A G - F K T P T I I A S L A T E     |         |                               |
| <i>Canis lupus</i>                | I G E V Q V A C G L N - - - Q T V E E F V G E - L N F G L V E V V Y E W A |         |                               |
| <i>Saccharmyces cerevisiae</i>    | M L S V F N T H Q I P - L T Q D E A E F L D R - K R F A M M N V V Y E W A |         |                               |
| <i>Aspergillus nidulans</i>       | V N D L Q I Q Y Q V I Q S S E D S N D F A S Q - P R F G L A E V V Y E W A |         |                               |
| <i>Bos taurus</i>                 | I G E V Q A A C G L N - - - Q T V E E F V G E - L N F G L V E V V Y E W A |         |                               |
| <i>Homo sapiens</i>               | I G E V Q V A C G L N - - - Q T V E E F V G E - L N F G L V E V V Y E W A |         |                               |
| <i>Pan troglodytes</i>            | I G E V Q V A C G L N - - - Q T V E E F V G E - L N F G L V E V V Y E W A |         |                               |
| <i>Dictyostelium discoideum</i>   | L C Q L E I D H G L Q - - - - V T L E E K E K I L K F G L M E V T Y E W A |         |                               |
| <i>Rattus norvegicus</i>          | I G E V Q V A C G L N - - - Q T V E E F V G E - L N F G L V E V V Y E W A |         |                               |
| <i>Selaginella moellendorffii</i> | L G D L Q V S H G L V - - - S H A E D Y A R D A L H F G L M E V V Y E W A |         |                               |
| <i>Physcomitrella patens</i>      | L G N V Q K S F D L S - - - L D P E D Y A R A N L K F G L M E V V Y E W A |         |                               |
| <i>Brachypodium distachyon</i>    | L G Q L Q K H H E V P - - - V D P E E Y A R D N L K F G L V E V V Y E W A |         |                               |
| <i>Oryza sativa</i>               | L G K L Q R E F K V P - - - V D P E E Y A R D N L K F G L V E V V Y E W A |         |                               |
| <i>Glycine max</i>                | L G E L Q A H F N L P - - - I N P A E Y A Q E N L K F G L V E V V Y E W A |         |                               |
| <i>Arabidopsis lyrata</i>         | L G E L Q A Q Y N L Q - - - I D P E E Y A Q E N L K F G L V E V V Y E W A |         |                               |
| <i>Arabidopsis thaliana</i>       | L G E L Q A Q Y N L Q - - - I D P E E Y A Q E N L K F G L V E V V Y E W A |         |                               |
|                                   | L G . . Q . L Q                                                           | E E . . | . N L . F G L V E V V Y E W A |

|                                   | 1450                                                                      | 1460    | 1470        |
|-----------------------------------|---------------------------------------------------------------------------|---------|-------------|
| <i>Ostreococcus tauri</i>         | A G L D Q A M R T T - - A W R V A - - T S L A K N A R E V S V M E A R A A |         |             |
| <i>Canis lupus</i>                | Q R L A E M C R S L R G A A R L V G E P V L G A K M E T A A T L L R R D I |         |             |
| <i>Saccharmyces cerevisiae</i>    | T W L D E I C R E V K T A S I I I G N S T L H M K M S R A Q E L I K R D I |         |             |
| <i>Aspergillus nidulans</i>       | T R L D E T C R E V R N A A K L V G D P T L Y A K M Q H A Q E L I K R D V |         |             |
| <i>Bos taurus</i>                 | Q R L A E M C R S L R G A A R L V G E P V L G A K M E T A A T L L R R D I |         |             |
| <i>Homo sapiens</i>               | Q R L A E M C R S L R G A A R L V G E P V L G A K M E T A A T L L R R D I |         |             |
| <i>Pan troglodytes</i>            | Q R L A E M C R S L R G A A R L V G E P V L G A K M E T A A T L L R R D I |         |             |
| <i>Dictyostelium discoideum</i>   | T R I G E T C Q E V R N C A R I I G D T K L Y Q K M D E A I R L I K R D I |         |             |
| <i>Rattus norvegicus</i>          | Q R L A E M C R S L R G A A R L V G E P V L G A K M E T A A T L L R R D I |         |             |
| <i>Selaginella moellendorffii</i> | V R L D E T C R E I K N A A R I M G D T T L F N K M D E A S N L I K R D I |         |             |
| <i>Physcomitrella patens</i>      | V R L D E T C R E F R N A A R L I G D S T L F E K M E Q A S N A I K R D I |         |             |
| <i>Brachypodium distachyon</i>    | V R L D E T C R E F R N A A S I M G N S A L F K K M E I A S N A I K R D I |         |             |
| <i>Oryza sativa</i>               | V R L D E T C R E F R N A A S I M G N S A L H K K M E T A S N A I K R D I |         |             |
| <i>Glycine max</i>                | V R L D E T C R E F K N A A A I M G N S A L C K K M E I A S N A I K R D I |         |             |
| <i>Arabidopsis lyrata</i>         | V R L D E T C R E F K N A A A I M G N S A L H K K M D A A S N A I K R D I |         |             |
| <i>Arabidopsis thaliana</i>       | V R L D E T C R E F K N A A A I M G N S A L H K K M D A A S N A I K R D I |         |             |
|                                   | R L D E T C R E . R N A A R . . G . . . L                                 | K M E A | L I K R D I |

|       |             |               |                       |
|-------|-------------|---------------|-----------------------|
| 1420  |             | 1430          | 1440                  |
| K L   | D K L V     | E A C L K S   | L S R S S - - - R - - |
| R G M | P F S       | E L A G L S   | G T P E G L V V R C I |
| R G L | S F K       | E I M E M S   | P E A E G T V V R V I |
| K G M | S F N R I   | T D L T D     | V M E G T I V R T I   |
| R G M | P F S       | E L A G L S   | G T P E G L V V R C I |
| R G M | P F S       | E L A G L S   | G T P E G L V V R C I |
| R G M | P F S       | E L A G L S   | G T P E G L V V R C I |
| R G M | P F N D I C | K L T N       | V L E G T I V R A I   |
| R G M | P F S       | E L A G L S   | G T P E G L V V R C I |
| K G T | P F S       | T I C E M T   | D V S E G L V V R T I |
| K G T | S F A       | D I C E I T N | V P E G S I V R T I   |
| K G T | P F A       | D I C E L T D | V S E G L I V R T I   |
| K G T | P F A       | D I C E L T D | V S E G L I V R T I   |
| K G T | P F A       | D I C E L T D | V P E G L I V R T I   |
| K G T | P F A       | E I C E L T D | V P E G L I V R T I   |
| K G T | P F A       | E I C E L T D | V P E G L I V R T I   |
| K G   | P F         | E I C . L T   | V P E G L I V R T I   |

|                       |                 |      |      |
|-----------------------|-----------------|------|------|
| 1480                  |                 | 1490 | 1500 |
| L A N                 | L E E - - - - - |      |      |
| V F A A S L Y         | T Q - - - - -   |      |      |
| V F A A S L Y         | L - - - - -     |      |      |
| I F A A S L Y         | M - - - - -     |      |      |
| V F A A S L Y         | T Q - - - - -   |      |      |
| V F A A S L Y         | T Q - - - - -   |      |      |
| V F A A S L Y         | T Q - - - - -   |      |      |
| V F A S L Y V         | V - - - - -     |      |      |
| V F A A S L Y         | T Q - - - - -   |      |      |
| V F A A S L Y V T G   | L V - - - - -   |      |      |
| V F A A S L Y V T G V | P V I - - - - - |      |      |
| V F S A S L Y V T G   | I - - - - -     |      |      |
| V F A A S L Y V T G   | I - - - - -     |      |      |
| V F A A S L Y I T G V | - - - - -       |      |      |
| V F A A S L Y V T G V | - - - - -       |      |      |
| V F A A S L Y V T G V | - - - - -       |      |      |
| V F A A S L Y . T G V | V I - - - - -   |      |      |
