# Supplementary material for: Context-Dependent Dual Role of SKI8 Homologs in mRNA Synthesis and Turnover
Source: PLoS Genet. 2012 Apr 12;8(4):e1002652. doi: 10.1371/journal.pgen.1002652 (PMC3325215; doi:10.1371/journal.pgen.1002652)
Supplement: Table S3 — RNA-seq read coverage of individual mRNAs and their deduced 5′ to 3′ coverage indices in vip3zwg mutants and the Sav-0 wild type background. (XLS) [file pgen.1002652.s003.xls]

## Sheet: ("hidden") exosome targets
AGI	transcript length (bp)	bp covered, wt	bp covered, zwg	% covered, wt	% covered, zwg	5' to 3' coverage index wt	5' to 3' coverage index zwg
AT1G03210	861	818	761	95.0058	88.3856	1.09091	0.578947
AT1G11260	1905	1770	1770	92.9134	92.9134	2.4359	1.47059
AT1G24100	1572	1552	1529	98.7277	97.2646	0.706667	0.538462
AT1G24706	5913	5030	5080	85.0668	85.9124	1.12174	0.786667
AT1G25550	1396	1264	1206	90.5444	86.3897	3.375	2
AT1G25560	1365	1212	1289	88.7912	94.4322	1.24138	1.33333
AT1G29070	772	626	531	81.0881	68.7824	0.232558	0.411765
AT1G32360	1726	1430	1273	82.8505	73.7543	0.133333	0.3
AT1G32440	1908	1574	1379	82.4948	72.2746	0.346154	1.2
AT1G32640	2179	1998	2051	91.6934	94.1257	5.09804	1.40541
AT1G37130	3130	3030	3041	96.8051	97.1565	1.69257	1.42365
AT1G41830	2068	1813	1633	87.6692	78.9652	2.57282	4
AT1G41880	729	532	411	72.9767	56.3786	0.272727	0.166667
AT1G50460	2074	1800	1258	86.7888	60.6557	0.324324	0.545455
AT1G64570	3720	3248	3161	87.3118	84.9731	3.03704	1.68
AT1G76880	2200	1919	1743	87.2273	79.2273	0.62963	0.882353
AT1G76890	1969	1717	1756	87.2016	89.1823	4.4375	5
AT1G76920	1615	1113	904	68.9164	55.9752	4.85714	1.2
AT1G78230	2295	2064	2008	89.9346	87.4946	1.26923	0.76
AT2G15430	1248	972	692	77.8846	55.4487	0.75	1
AT2G17110	2684	2068	1752	77.0492	65.2757	0.657143	1.11765
AT2G18940	2666	2189	2116	82.108	79.3698	0.582278	0.516129
AT2G20570	1625	1555	1624	95.6923	99.9385	4.22222	1.5814
AT2G20580	3065	2911	2989	94.9755	97.5204	0.515723	0.677215
AT2G22490	1708	1132	954	66.2763	55.8548	0.8125	0.6
AT2G23350	2373	2297	2223	96.7973	93.6789	3.41667	1.16129
AT2G46670	727	588	441	80.8803	60.6602	2.33333	1.2
AT3G01120	2234	1869	1858	83.6616	83.1692	7.28916	1.84848
AT3G02830	1695	1442	1534	85.0737	90.5015	1.81818	0.947368
AT3G05700	1265	661	860	52.253	67.9842	0.2	0.277778
AT3G13720	938	779	605	83.049	64.4989	0.411765	0.75
AT3G18050	1341	1155	681	86.1298	50.783	0.108108	0.666667
AT3G29075	1106	939	986	84.9005	89.1501	2.35294	1.27778
AT3G42050	1900	1725	1604	90.7895	84.4211	3.77143	4.77778
AT3G55640	1462	916	977	62.6539	66.8263	8.33333	3.6
AT3G55646	1022	665	568	65.0685	55.5773	4	1
AT3G55950	2705	2143	1712	79.2237	63.2902	0.258065	1.14286
AT3G56080	2124	1420	1808	66.855	85.1224	0.780488	0.791667
AT3G57990	1485	1372	1211	92.3906	81.5488	0.842105	0.967742
AT4G07990	1285	676	812	52.607	63.1907	6	2.8
AT4G25260	949	562	529	59.2202	55.7429	0.333333	0.166667
AT4G27600	1761	1666	1617	94.6053	91.8228	1.90116	0.636364
AT4G29900	3552	3084	2749	86.8243	77.393	2.7037	2.84615
AT4G29905	367	413	273	112.534	74.3869	0.103448	0.25
AT4G33090	2852	2631	2207	92.2511	77.3843	0.318841	0.666667
AT4G37540	995	849	681	85.3266	68.4422	4.91667	2.6
AT4G39050	3698	3129	2769	84.6133	74.8783	0.349206	0.95
AT5G01340	1274	724	736	56.8289	57.7708	1	0.583333
AT5G06160	1904	1618	1353	84.979	71.0609	1.10526	3.83333
AT5G11090	1167	866	863	74.2074	73.9503	0.2	0.190476
AT5G15540	5541	4106	4024	74.1021	72.6223	1.1	0.621622
AT5G16620	1735	1535	1490	88.4726	85.879	1.27273	2.3
AT5G16760	1559	1259	1352	80.7569	86.7223	0.285714	0.52381
AT5G21940	1159	999	882	86.195	76.1001	0.706897	0.659574
AT5G25890	873	727	521	83.2761	59.6793	2.5	0.3
AT5G26990	1244	806	815	64.791	65.5145	0.333333	0.333333
AT5G27770	700	666	584	95.1429	83.4286	1.56667	0.157895
AT5G36120	657	339	361	51.5982	54.9467	0.125	0.166667
AT5G37740	890	574	645	64.4944	72.4719	2.25	0.5
AT5G44100	2198	1471	1508	66.9245	68.6078	0.21519	0.806452
AT5G54180	1635	869	900	53.1498	55.0459	2	0.8
AT5G56860	1678	1335	1075	79.559	64.0644	1.20588	0.47619
AT5G56870	2502	1537	1910	61.4309	76.3389	8	1.8
AT5G62680	2265	2032	2010	89.713	88.7417	0.321429	0.740741
AT5G62690	1726	1442	1291	83.5458	74.7972	0.194245	0.560976
AT5G63050	1496	1262	1163	84.3583	77.7406	0.473684	0.777778
AT5G65700	3383	2786	2320	82.3529	68.5782	0.64	0.3
AT5G67420	1651	1036	1091	62.7498	66.0812	1.21127	0.740741

## Sheet: nuclear mRNAs
AGI	transcript length (bp)	bp covered, wt	bp covered, zwg	% covered, wt	% covered, zwg	5' to 3' coverage index wt	5' to 3' coverage index zwg
AT1G01010	1688	1254	1167	74.2891	69.1351	0.347826	0.142857
AT1G01040	6251	5458	5274	87.314	84.3705	0.284722	0.333333
AT1G01050	976	677	554	69.3648	56.7623	0.625	0.714286
AT1G01090	1627	1432	1146	88.0148	70.4364	2.14583	1.5
AT1G01120	1899	1768	1598	93.1016	84.1496	2.03448	2.53333
AT1G01220	3267	2595	1775	79.4307	54.3312	0.961538	1.625
AT1G01230	832	687	672	82.5721	80.7692	0.8	0.75
AT1G01320	6015	5736	5525	95.3616	91.8537	2.99219	3.16575
AT1G01340	2411	1245	1363	51.6383	56.5326	2.75	1.22222
AT1G01350	1400	947	989	67.6429	70.6429	4.5	0.75
AT1G01390	1687	1226	1042	72.6734	61.7664	0.55	1.6
AT1G01430	1642	957	836	58.2826	50.9135	2	0.6
AT1G01440	2221	1897	1731	85.412	77.9379	5.5	2.4
AT1G01470	727	552	479	75.9285	65.8872	0.55	1.17647
AT1G01610	1856	1598	1231	86.0991	66.3254	0.303571	0.625
AT1G01630	1203	882	958	73.3167	79.6342	2.125	3
AT1G01680	965	600	690	62.1762	71.5026	0.4	2
AT1G01720	1316	1157	1127	87.9179	85.6383	1.28571	1.22222
AT1G01730	910	746	583	81.978	64.0659	0.5	0.4
AT1G01770	2362	1717	1522	72.6926	64.4369	0.5	1.3
AT1G01780	939	598	543	63.6848	57.8275	0.5	1
AT1G01790	3807	3735	3781	98.1087	99.317	1.06306	0.718447
AT1G01820	1048	722	828	68.8931	79.0076	1.11111	0.222222
AT1G01960	5495	4737	4368	86.2056	79.4904	1.48193	1.43243
AT1G01970	1649	1347	1007	81.6859	61.0673	0.888889	3
AT1G02080	7495	6646	6290	88.6724	83.9226	0.730337	0.61194
AT1G02120	1974	1935	1958	98.0243	99.1895	0.117871	0.636364
AT1G02140	785	666	765	84.8408	97.4522	3.52381	2.05
AT1G02150	1910	1691	1724	88.534	90.2618	0.333333	0.6
AT1G02170	1336	1216	1024	91.018	76.6467	0.225806	0.714286
AT1G02260	2146	1334	1106	62.1622	51.5377	0.327273	0.777778
AT1G02270	1645	1145	875	69.6049	53.1915	0.439024	1.22222
AT1G02300	1227	1047	974	85.3301	79.3806	0.104651	0.62963
AT1G02305	1407	1210	1218	85.9986	86.5672	0.122222	0.833333
AT1G02330	1058	815	583	77.0321	55.104	0.545455	0.666667
AT1G02410	1176	863	904	73.3844	76.8707	0.75	0.8
AT1G02450	541	330	428	60.9982	79.1128	0.25	0.833333
AT1G02560	1341	1228	1158	91.5735	86.3535	2.38462	1.73529
AT1G02660	2609	1367	1306	52.3956	50.0575	2.08333	1.1
AT1G02680	907	487	557	53.6935	61.4112	5	1.25
AT1G02750	1000	903	815	90.3	81.5	0.6	0.833333
AT1G02780	1031	961	943	93.2105	91.4646	0.360269	0.95
AT1G02816	1009	701	775	69.4747	76.8087	0.333333	1
AT1G02820	615	446	445	72.5203	72.3577	0.416667	1
AT1G02870	843	626	569	74.2586	67.497	0.315789	0.888889
AT1G02910	1557	1415	1460	90.8799	93.7701	0.829268	0.75
AT1G02920	925	847	834	91.5676	90.1622	1.52632	2.11429
AT1G02930	1049	859	828	81.8875	78.9323	0.252874	1.25301
AT1G03000	3100	2416	1747	77.9355	56.3548	1.18519	0.35
AT1G03030	1345	947	708	70.4089	52.6394	1.66667	0.333333
AT1G03040	1456	1148	860	78.8462	59.0659	3.5	3.4
AT1G03060	11304	9660	9263	85.4565	81.9444	1.90625	1.26136
AT1G03080	5292	4849	4884	91.6289	92.2902	1.32609	1.04
AT1G03140	1443	1189	1133	82.3978	78.517	0.27907	0.73913
AT1G03150	743	544	552	73.2167	74.2934	0.166667	0.352941
AT1G03210	861	818	761	95.0058	88.3856	1.09091	0.578947
AT1G03250	1170	918	786	78.4615	67.1795	2.11111	6.66667
AT1G03280	1901	1625	1644	85.4813	86.4808	1	1.10526
AT1G03290	1860	1595	1755	85.7527	94.3548	1.09091	1.25
AT1G03350	1756	1571	1478	89.4647	84.1686	0.966667	0.4
AT1G03370	6117	5079	4131	83.0309	67.5331	0.140187	0.179104
AT1G03380	3732	3197	3313	85.6645	88.7728	0.411765	0.711111
AT1G03400	1236	1063	1156	86.0032	93.5275	0.961538	0.90625
AT1G03430	1025	853	747	83.2195	72.878	0.75	0.428571
AT1G03440	1667	1284	1003	77.0246	60.168	0.157895	0.333333
AT1G03475	1448	1423	1294	98.2735	89.3646	1.21338	0.852459
AT1G03530	2601	2045	1352	78.6236	51.98	1.36364	1
AT1G03590	1798	1303	1001	72.4694	55.673	0.152542	0.590909
AT1G03680	910	816	732	89.6703	80.4396	0.459677	0.4625
AT1G03730	1068	722	566	67.603	52.9963	1	1
AT1G03870	1035	861	782	83.1884	75.5556	1.73913	0.444444
AT1G03900	1198	1129	1154	94.2404	96.3272	0.5625	0.785714
AT1G03910	2128	2101	1970	98.7312	92.5752	0.785714	0.75
AT1G03930	2338	1734	1694	74.166	72.4551	2.88889	2.57143
AT1G04040	1063	973	883	91.5334	83.0668	2.87931	4
AT1G04120	5277	4192	4347	79.4391	82.3764	0.982143	0.772727
AT1G04130	1315	945	748	71.8631	56.8821	1	0.222222
AT1G04170	1793	1607	1412	89.6263	78.7507	1.96154	2.71429
AT1G04200	2625	1917	1884	73.0286	71.7714	0.75	0.315789
AT1G04210	3986	3527	3046	88.4847	76.4175	0.65625	0.8
AT1G04230	1376	1029	811	74.782	58.939	0.333333	0.5
AT1G04250	1087	788	624	72.4931	57.4057	0.333333	0.333333
AT1G04280	1925	1370	1123	71.1688	58.3377	0.7	1.6
AT1G04340	842	464	550	55.1069	65.3207	4.25	2.75
AT1G04350	1444	1199	1204	83.0332	83.3795	0.769231	2.41176
AT1G04410	1484	1443	1433	97.2372	96.5633	4.15909	1.83333
AT1G04420	1450	1423	1364	98.1379	94.069	1.3038	1.40909
AT1G04440	2106	1904	1923	90.4084	91.3105	0.5	0.3
AT1G04530	1352	1295	1261	95.784	93.2692	0.151042	0.422222
AT1G04630	745	683	416	91.6779	55.8389	1.41304	1
AT1G04680	1923	1655	1036	86.0634	53.8742	0.591837	1
AT1G04690	1415	1243	1364	87.8445	96.3958	0.142857	0.410714
AT1G04710	1595	1444	1136	90.5329	71.2226	2.83333	1.625
AT1G04770	1187	1100	1088	92.6706	91.6596	0.5625	0.707317
AT1G04780	2836	2324	2429	81.9464	85.6488	0.27907	0.566667
AT1G04800	835	775	681	92.8144	81.5569	1.77778	2.33333
AT1G04810	3311	2997	2642	90.5165	79.7946	1.13043	0.83871
AT1G04820	1703	1596	1412	93.717	82.9125	1.72441	0.742857
AT1G04850	1573	1233	1122	78.3853	71.3287	0.631579	0.689655
AT1G04860	3418	3006	2829	87.9462	82.7677	0.956522	0.636364
AT1G04910	1903	1063	1413	55.8592	74.2512	0.95	1.75
AT1G04940	1138	965	926	84.7979	81.3708	1.12121	0.521739
AT1G04980	1593	1107	955	69.4915	59.9498	1	0.727273
AT1G04985	993	688	782	69.285	78.7513	5	1.13333
AT1G05010	1364	1079	1211	79.1056	88.783	6.95833	2.42857
AT1G05060	1001	724	577	72.3277	57.6424	0.571429	0.4
AT1G05070	877	655	507	74.6864	57.8107	0.333333	0.727273
AT1G05090	2121	1509	1519	71.1457	71.6172	1.71429	0.571429
AT1G05120	2731	1547	1460	56.6459	53.4603	1.16667	1
AT1G05140	1509	1386	1332	91.8489	88.2704	0.578947	0.25
AT1G05150	2894	2454	2279	84.7961	78.7491	0.333333	0.68
AT1G05205	557	403	281	72.3519	50.4488	4.8	1
AT1G05270	1386	1019	855	73.5209	61.6883	3.36842	1.71429
AT1G05385	746	465	615	62.3324	82.4397	1.33333	0.333333
AT1G05500	2110	1920	1552	90.9953	73.5545	1.38889	0.647059
AT1G05520	2586	1919	1770	74.2073	68.4455	8.28571	1.66667
AT1G05560	1650	1262	1263	76.4848	76.5455	0.565217	2
AT1G05570	6036	5003	5141	82.886	85.1723	2.08235	1.47674
AT1G05590	2131	1791	1180	84.045	55.3731	2.11765	4.33333
AT1G05690	1660	1097	1082	66.0843	65.1807	1.33333	1
AT1G05720	782	405	537	51.7903	68.6701	1.14286	0.611111
AT1G05805	1425	1114	1278	78.1754	89.6842	0.138889	0.727273
AT1G05810	896	714	455	79.6875	50.7812	0.875	1
AT1G05840	1698	1167	1183	68.7279	69.6702	0.24	0.642857
AT1G05850	1478	1344	1307	90.9337	88.4303	6.77419	4.37931
AT1G05860	1176	813	723	69.1327	61.4796	0.166667	2.5
AT1G05890	2296	2073	2094	90.2875	91.2021	0.418605	0.575758
AT1G05910	3942	3205	2622	81.3039	66.5145	0.451613	0.444444
AT1G05940	1955	1301	1266	66.5473	64.757	2.85714	1.30769
AT1G06000	1587	1426	911	89.8551	57.4039	4.84211	3.66667
AT1G06060	1115	849	700	76.1435	62.7803	1.4	1.25
AT1G06110	1564	1095	1169	70.0128	74.7442	3.75	3
AT1G06200	972	904	674	93.0041	69.3416	0.468085	0.263158
AT1G06290	2375	2182	2048	91.8737	86.2316	0.227941	0.267606
AT1G06400	995	716	867	71.9598	87.1357	0.552632	1.40625
AT1G06410	3053	2701	2650	88.4704	86.7999	0.273973	0.684211
AT1G06430	2255	2154	2133	95.5211	94.5898	0.369668	1.00813
AT1G06450	1380	845	851	61.2319	61.6667	0.625	0.8
AT1G06460	1226	1028	1026	83.8499	83.6868	0.15	1.2
AT1G06510	1147	592	584	51.6129	50.9154	1	0.428571
AT1G06530	1003	975	954	97.2084	95.1147	1.3125	1.5
AT1G06645	1301	1036	1174	79.6311	90.2383	1.06667	0.769231
AT1G06670	5144	4604	4257	89.5023	82.7566	1.32727	0.911111
AT1G06720	3657	2558	2197	69.948	60.0766	1.75	1.36364
AT1G06760	1090	1042	1028	95.5963	94.3119	0.215116	0.703125
AT1G06780	2144	1190	1192	55.5037	55.597	6.5	1
AT1G06830	505	424	314	83.9604	62.1782	0.153846	1.5
AT1G06870	1687	1162	976	68.8797	57.8542	0.5	2
AT1G06900	3413	2277	1787	66.7155	52.3586	0.9	0.933333
AT1G06950	3314	3097	2496	93.452	75.3168	0.651639	1.55882
AT1G07000	2024	1798	1760	88.834	86.9565	0.951613	1.33333
AT1G07110	2662	2010	2013	75.5071	75.6198	3	1.03226
AT1G07140	1429	1193	1084	83.485	75.8572	2.72671	0.636943
AT1G07180	1788	1667	1658	93.2327	92.7293	1.93182	0.756757
AT1G07210	1197	907	842	75.7728	70.3425	1.09091	1
AT1G07220	1767	1452	1114	82.1732	63.0447	0.363636	0.642857
AT1G07230	2062	1478	1122	71.678	54.4132	0.909091	1.875
AT1G07240	1762	1277	1283	72.4745	72.815	0.791667	1.375
AT1G07250	1667	1556	1576	93.3413	94.5411	1.33333	0.958333
AT1G07360	1689	1113	1386	65.897	82.0604	1.36842	1.35714
AT1G07470	1538	1332	1194	86.606	77.6333	0.411765	0.5
AT1G07510	2917	2439	2203	83.6133	75.5228	0.205882	0.483871
AT1G07530	2787	2342	2119	84.033	76.0316	2.81818	1.22222
AT1G07630	2336	2027	1785	86.7723	76.4127	5.85714	2
AT1G07650	3451	2238	2183	64.8508	63.257	0.208333	0.390244
AT1G07670	3538	2559	2552	72.329	72.1311	0.717949	1.44444
AT1G07720	1799	1527	1287	84.8805	71.5397	1.2	3.33333
AT1G07750	1414	781	870	55.2334	61.5276	0.8	0.75
AT1G07810	3499	3208	3119	91.6833	89.1398	1.04444	0.5
AT1G07980	996	644	645	64.6586	64.759	2.83333	4
AT1G07990	2905	2574	2681	88.6059	92.2892	0.3125	0.742857
AT1G08050	2294	1886	1908	82.2145	83.1735	0.769231	0.727273
AT1G08190	3344	3158	3093	94.4378	92.494	1.08383	0.833333
AT1G08200	1686	1411	1300	83.6892	77.1056	1.02941	1.24138
AT1G08250	1445	974	996	67.4048	68.9273	1.1	0.5
AT1G08360	949	877	867	92.4131	91.3593	0.142857	0.216667
AT1G08380	703	754	588	107.255	83.6415	2.01507	1.65429
AT1G08410	2161	1720	1108	79.5928	51.2726	0.473684	0.785714
AT1G08420	3740	3502	3647	93.6364	97.5134	2.59677	1.61702
AT1G08460	1369	1217	864	88.897	63.1118	0.944444	1
AT1G08480	761	758	596	99.6058	78.318	2.33333	2.125
AT1G08490	1761	1186	1246	67.3481	70.7553	1	2.18182
AT1G08520	2549	2433	2393	95.4492	93.88	0.903475	0.890244
AT1G08540	1993	1931	1856	96.8891	93.1259	0.295	0.214286
AT1G08580	642	453	446	70.5607	69.4704	8.5	1.25
AT1G08600	4622	3191	2860	69.0394	61.878	0.666667	1.58824
AT1G08700	1561	1353	1085	86.6752	69.5067	1.09091	1.66667
AT1G08720	3081	2598	2125	84.3233	68.9711	3.41667	2
AT1G08760	2566	1891	1357	73.6945	52.8839	0.857143	0.6
AT1G08770	865	702	542	81.1561	62.659	4.33333	3.33333
AT1G08780	602	406	315	67.4419	52.3256	1.4	2
AT1G08880	748	600	661	80.2139	88.369	1.33333	1.47059
AT1G08980	1512	1367	1047	90.4101	69.246	0.933333	0.25
AT1G09010	3025	2653	2346	87.7025	77.5537	1.22222	0.793103
AT1G09020	2302	1776	1773	77.1503	77.02	1.0625	0.461538
AT1G09070	1266	1194	1226	94.3128	96.8404	0.194175	0.237288
AT1G09080	2116	1383	1072	65.3592	50.6616	1.375	0.875
AT1G09150	1014	751	769	74.0631	75.8383	2.5	1.75
AT1G09200	607	642	593	105.766	97.6936	3.4	5.5
AT1G09210	1745	1349	1435	77.3066	82.235	0.27027	0.763158
AT1G09250	980	810	782	82.6531	79.7959	0.428571	0.181818
AT1G09280	1917	1182	998	61.6588	52.0605	0.909091	1.85714
AT1G09310	826	796	745	96.368	90.1937	0.20696	0.454545
AT1G09340	1481	1416	1382	95.6111	93.3153	1.33696	1.19588
AT1G09430	1838	1549	1516	84.2764	82.481	0.150685	0.272727
AT1G09620	3720	3560	3226	95.6989	86.7204	0.955556	0.517857
AT1G09640	1795	1707	1614	95.0975	89.9164	1.11765	1.14
AT1G09645	751	445	568	59.2543	75.6325	0.6	2
AT1G09690	759	660	620	86.9565	81.6864	1.17757	2.21212
AT1G09730	3305	1775	2101	53.7065	63.5703	1.46429	1.0625
AT1G09740	843	563	635	66.7853	75.3262	0.166667	1.25
AT1G09770	2934	2549	2519	86.878	85.8555	1.46154	1.58621
AT1G09780	1911	1828	1698	95.6567	88.854	3.08	2
AT1G09795	1516	1570	1341	103.562	88.4565	0.462264	0.8125
AT1G09815	658	472	490	71.7325	74.4681	0.222222	1
AT1G09830	1790	1489	1079	83.1844	60.2793	0.736842	1.125
AT1G09870	1694	1361	1422	80.3424	83.9433	0.692308	0.529412
AT1G09900	1797	1683	1042	93.6561	57.9855	1.15385	0.7
AT1G09920	968	735	741	75.9298	76.5496	0.235294	0.285714
AT1G09940	2114	1619	1319	76.5847	62.3936	0.266667	0.5
AT1G10020	1976	1638	1716	82.8947	86.8421	0.118881	0.703704
AT1G10050	3230	2121	2001	65.6656	61.9505	0.142857	1
AT1G10130	3478	3042	2271	87.4641	65.2961	1.07143	3.27273
AT1G10150	1791	1457	1571	81.3512	87.7164	0.433333	0.344828
AT1G10170	3897	3679	3645	94.406	93.5335	0.453488	0.361111
AT1G10180	2502	1894	1542	75.6994	61.6307	1.16667	1.5
AT1G10290	3304	3103	3082	93.9165	93.2809	1.58	0.640625
AT1G10350	1433	918	874	64.0614	60.9909	4.2	0.625
AT1G10360	907	868	779	95.7001	85.8875	1.63636	3
AT1G10370	962	850	702	88.3576	72.973	0.202703	0.818182
AT1G10410	1995	1161	1315	58.1955	65.9148	1.54545	0.933333
AT1G10430	1344	1068	1041	79.4643	77.4554	2.19048	1.58333
AT1G10450	3827	2667	2091	69.6891	54.6381	0.6	1.11111
AT1G10470	1275	999	938	78.3529	73.5686	2.78261	0.9625
AT1G10490	3843	2570	2409	66.8748	62.6854	1.52941	1.2381
AT1G10500	848	627	690	73.9387	81.3679	1	3.33333
AT1G10510	2150	1962	1917	91.2558	89.1628	0.779661	1
AT1G10580	2073	1848	1768	89.1462	85.287	6.25	1.5
AT1G10700	1518	1100	1074	72.4638	70.751	2.2	2
AT1G10720	1615	1252	1317	77.5232	81.548	2.57143	1.58333
AT1G10730	1287	995	936	77.3116	72.7273	0.888889	1
AT1G10760	4376	4053	3924	92.6188	89.6709	0.77551	0.952381
AT1G10890	1254	1120	1003	89.3142	79.9841	0.5	0.411765
AT1G10900	2644	1888	2048	71.407	77.4584	0.580645	0.484848
AT1G10910	2213	1697	1554	76.6832	70.2214	0.484848	1.42857
AT1G10940	1773	1186	1282	66.8923	72.3068	1.97059	2.42857
AT1G10950	2245	2137	1765	95.1893	78.6192	0.253968	0.52381
AT1G11020	1417	868	744	61.2562	52.5053	0.666667	1.4
AT1G11050	2282	1841	1801	80.6748	78.922	1.66667	1.55556
AT1G11200	1153	761	609	66.0017	52.8187	0.8	7
AT1G11210	1213	678	637	55.8945	52.5144	5.66667	0.7
AT1G11260	1905	1770	1770	92.9134	92.9134	2.4359	1.47059
AT1G11330	2865	2440	2251	85.1658	78.5689	2.94737	2.52632
AT1G11350	2680	2425	1948	90.4851	72.6866	1.09091	0.538462
AT1G11380	1107	901	798	81.3911	72.0867	0.5	0.818182
AT1G11410	2671	2028	1861	75.9266	69.6743	1.6	1
AT1G11440	1303	762	888	58.4804	68.1504	2.33333	0.571429
AT1G11475	562	315	428	56.0498	76.1566	9	4.33333
AT1G11530	611	445	415	72.8314	67.9214	0.428571	1
AT1G11580	1876	1859	1709	99.0938	91.0981	2.5625	1.72727
AT1G11680	1832	1565	1316	85.4258	71.8341	0.148148	0.818182
AT1G11720	3282	2724	2616	82.9982	79.7075	1.08889	1
AT1G11750	1268	918	733	72.3975	57.8076	0.666667	0.666667
AT1G11800	1648	835	856	50.6675	51.9417	0.909091	0.666667
AT1G11890	1094	877	802	80.1645	73.309	0.5	0.416667
AT1G12050	1675	1299	1122	77.5522	66.9851	1.08333	0.4
AT1G12090	879	651	524	74.0614	59.6132	7	0.5
AT1G12110	2136	1968	2041	92.1348	95.5524	0.300885	0.590164
AT1G12120	1955	1608	1511	82.2506	77.289	3.4	5.25
AT1G12200	1685	1341	1183	79.5846	70.2077	0.142857	0.5
AT1G12230	1552	1234	1178	79.5103	75.9021	0.4	0.625
AT1G12240	2229	2118	2092	95.0202	93.8537	4.60656	1.73684
AT1G12270	1949	1798	1703	92.2524	87.3781	0.916667	0.833333
AT1G12280	2685	1896	1592	70.6145	59.2924	0.3125	0.538462
AT1G12320	841	616	719	73.2461	85.4935	1	1
AT1G12350	1279	934	733	73.0258	57.3104	0.275862	0.363636
AT1G12360	2557	2250	2254	87.9937	88.1502	0.711111	0.697674
AT1G12410	1079	1012	999	93.7905	92.5857	2.0303	0.48
AT1G12420	1858	1041	1134	56.028	61.0334	4	2.5
AT1G12450	1285	726	685	56.4981	53.3074	0.428571	1.2
AT1G12470	3254	2992	2632	91.9484	80.8851	0.535211	0.466667
AT1G12580	1972	1855	1804	94.0669	91.4807	2.42424	2.0625
AT1G12640	1795	1153	1010	64.234	56.2674	0.15	0.363636
AT1G12680	1933	1544	1383	79.8758	71.5468	2	2.42857
AT1G12770	2069	1811	1562	87.5302	75.4954	0.328767	0.541667
AT1G12800	2673	2446	2091	91.5077	78.2267	6.65	4.2
AT1G12820	2229	2004	1870	89.9058	83.8941	0.555556	0.288462
AT1G12830	921	545	472	59.1748	51.2486	8	1
AT1G12840	1491	1352	1385	90.6774	92.8907	0.84375	0.724138
AT1G12850	1568	1140	1029	72.7041	65.625	0.588235	0.777778
AT1G12920	1656	1499	1514	90.5193	91.4251	0.583333	1.27778
AT1G12990	2035	1678	1907	82.457	93.7101	0.203704	0.451613
AT1G13020	2197	1874	1787	85.2981	81.3382	0.155963	0.185185
AT1G13060	1147	961	1033	83.7838	90.061	1.86364	1
AT1G13090	1656	1535	1581	92.6932	95.471	1.40909	0.636364
AT1G13110	1743	1727	1582	99.082	90.7631	1.83333	0.392857
AT1G13180	1915	1364	1026	71.2272	53.577	2.25	1
AT1G13190	2179	1788	1787	82.056	82.0101	2.5	1.55
AT1G13210	4065	3698	3833	90.9717	94.2927	0.90625	1.46988
AT1G13245	579	462	452	79.7927	78.0656	1.25	0.833333
AT1G13340	1479	988	1072	66.8019	72.4814	2.66667	2.5
AT1G13350	2454	1898	1900	77.3431	77.4246	0.538462	0.592593
AT1G13470	1272	1270	1252	99.8428	98.4277	1.53153	2.10127
AT1G13640	2489	2292	1801	92.0852	72.3584	0.386364	1
AT1G13690	856	630	549	73.5981	64.1355	0.444444	0.166667
AT1G13740	1591	1023	888	64.2992	55.814	1.66667	1.66667
AT1G13750	2082	1229	1104	59.0298	53.0259	0.333333	0.25
AT1G13820	1286	1189	942	92.4572	73.2504	3.44444	2.5
AT1G13870	1148	755	718	65.7666	62.5436	0.2	1
AT1G13880	1705	1311	1354	76.8915	79.4135	0.461538	0.5
AT1G13900	2346	1923	1462	81.9693	62.3188	0.606061	0.545455
AT1G13940	3374	2498	1858	74.0368	55.0682	0.590909	0.705882
AT1G13980	4835	4071	3862	84.1986	79.8759	0.707317	1.83333
AT1G14000	1805	1637	1599	90.6925	88.5873	4.61538	1.03448
AT1G14010	915	642	670	70.1639	73.224	3.66667	1.46154
AT1G14030	1713	1150	987	67.1337	57.6182	1	1.6
AT1G14200	817	535	608	65.4835	74.4186	1	3
AT1G14230	1846	1128	1060	61.1051	57.4215	1	2.4
AT1G14280	1523	1373	1395	90.151	91.5955	1.38462	1.625
AT1G14310	891	527	480	59.147	53.8721	5	0.166667
AT1G14340	1039	812	658	78.1521	63.3301	0.25	3
AT1G14360	1388	782	986	56.3401	71.0375	0.166667	0.263158
AT1G14370	1743	1488	1459	85.3701	83.7063	1.5	1.15385
AT1G14410	1115	696	642	62.4215	57.5785	1	1.6
AT1G14450	535	362	414	67.6636	77.3832	0.285714	0.192308
AT1G14610	3632	2732	2329	75.2203	64.1244	1.5	3
AT1G14670	2165	1966	1826	90.8083	84.3418	0.265306	0.291667
AT1G14740	2498	2192	2223	87.7502	88.9912	1.12821	1.44737
AT1G14790	3807	3095	2771	81.2976	72.787	0.9	1.125
AT1G14810	1450	1297	996	89.4483	68.6897	4.70588	5
AT1G14830	2323	1623	1407	69.8666	60.5682	0.892857	0.64
AT1G14910	2413	1913	1514	79.2789	62.7435	0.76	1
AT1G14920	2129	1906	1755	89.5256	82.4331	1.95833	0.615385
AT1G14980	690	739	595	107.101	86.2319	1.7619	1.22222
AT1G14990	668	543	384	81.2874	57.485	1.5	0.8
AT1G15030	1645	1519	1205	92.3404	73.2523	1.05	0.333333
AT1G15130	2823	2527	2593	89.5147	91.8526	2.86275	0.692308
AT1G15260	814	762	571	93.6118	70.1474	1.83333	1.5
AT1G15270	479	306	318	63.8831	66.3883	3	2.63636
AT1G15290	5145	4907	4332	95.3741	84.1983	1.72685	2.23256
AT1G15370	734	598	542	81.4714	73.842	0.4	0.5
AT1G15390	1006	773	652	76.839	64.8111	0.529412	0.833333
AT1G15500	2179	2111	2024	96.8793	92.8866	0.979167	1.14815
AT1G15520	4558	3649	4025	80.057	88.3063	2	0.766355
AT1G15530	1971	1591	1083	80.7204	54.9467	0.157895	0.363636
AT1G15730	1531	1270	1189	82.9523	77.6617	1.75	2
AT1G15740	2295	1992	2093	86.7974	91.1983	0.166667	0.392157
AT1G15780	4271	3383	3557	79.2086	83.2826	1.19355	1.53846
AT1G15810	1631	1365	1206	83.691	73.9424	8	1.64286
AT1G15820	1183	1081	1094	91.3779	92.4768	0.373584	1.28783
AT1G15940	3289	2301	2746	69.9605	83.4904	0.205882	0.708333
AT1G15970	1658	1219	836	73.5223	50.4222	1.46667	0.909091
AT1G15980	1566	1500	1499	95.7854	95.7216	2.68182	1.15254
AT1G16040	848	684	511	80.6604	60.2594	1	2.5
AT1G16080	1285	1155	1064	89.8833	82.8016	3.38889	2.25
AT1G16170	697	547	578	78.4792	82.9268	2.8	5
AT1G16180	1471	1247	1283	84.7723	87.2196	3.86667	0.53125
AT1G16210	1034	959	926	92.7466	89.5551	4.02703	2.19231
AT1G16250	1824	1514	1064	83.0044	58.3333	4.33333	2
AT1G16260	2387	1497	1324	62.7147	55.4671	0.764706	1.33333
AT1G16270	3667	3093	2359	84.3469	64.3305	1.21212	1.14286
AT1G16280	1476	834	862	56.5041	58.4011	5.66667	3.5
AT1G16320	1129	986	1029	87.3339	91.1426	1	2.25
AT1G16350	1644	1607	1327	97.7494	80.7178	2.07407	1.22222
AT1G16400	1878	1534	1495	81.6826	79.606	0.132911	1
AT1G16420	1338	1057	1132	78.9985	84.6039	0.255319	1
AT1G16670	1720	1196	1364	69.5349	79.3023	1	0.9
AT1G16680	1792	1127	945	62.8906	52.7344	0.454545	5.5
AT1G16700	1061	976	901	91.9887	84.9199	0.833333	0.846154
AT1G16710	5954	5264	4677	88.4112	78.5522	1.14286	1.02273
AT1G16720	2100	2028	2035	96.5714	96.9048	0.567568	0.548718
AT1G16740	594	489	502	82.3232	84.5118	0.4	0.285714
AT1G16870	1769	1162	949	65.6868	53.6461	0.2	0.181818
AT1G17050	1591	1351	1487	84.9151	93.4632	0.777778	1.17647
AT1G17070	2743	1557	1764	56.7627	64.3092	0.27027	0.4
AT1G17100	911	773	579	84.8518	63.5565	0.75	0.833333
AT1G17110	3320	2602	2230	78.3735	67.1687	1.5	1
AT1G17120	2003	1613	1553	80.5292	77.5337	0.371429	0.428571
AT1G17170	855	608	754	71.1111	88.1871	0.2	0.15
AT1G17200	866	598	573	69.0531	66.1663	0.111111	0.75
AT1G17210	3348	2963	2915	88.5006	87.0669	0.122581	0.346154
AT1G17220	3686	3517	3589	95.4151	97.3684	1.83432	1.245
AT1G17290	2080	1874	1904	90.0962	91.5385	3.375	0.877551
AT1G17330	962	815	726	84.7193	75.4678	0.2	0.4
AT1G17340	2987	2664	2687	89.1865	89.9565	2.47368	1.10526
AT1G17360	3530	3334	3274	94.4476	92.7479	0.538462	1.11429
AT1G17420	2957	2484	1626	84.0041	54.9882	1.75	0.5
AT1G17430	1136	954	598	83.9789	52.6408	1.6	6
AT1G17490	569	321	518	56.4148	91.0369	0.25	0.7
AT1G17500	3953	3451	2773	87.3008	70.1493	1.02632	1.09091
AT1G17530	876	739	689	84.3607	78.653	0.428571	0.272727
AT1G17550	2441	2094	2026	85.7845	82.9988	1.95	1.65
AT1G17580	4960	3810	3016	76.8145	60.8065	1.22727	0.772727
AT1G17600	3078	2110	2175	68.551	70.6628	0.9375	0.947368
AT1G17610	1463	829	908	56.6644	62.0643	0.4	1.66667
AT1G17730	895	673	737	75.1955	82.3464	0.75	1.28571
AT1G17744	1023	629	627	61.4858	61.2903	1	1.5
AT1G17745	2354	2100	1995	89.2099	84.7494	7.75	3.66667
AT1G17820	2856	1989	1661	69.6429	58.1583	3.125	1.66667
AT1G17840	3045	2550	1947	83.7438	63.9409	0.229508	0.333333
AT1G18000	1687	1302	1256	77.1784	74.4517	0.5	0.533333
AT1G18010	1587	1484	1165	93.5098	73.4089	9	7.66667
AT1G18060	1003	788	794	78.5643	79.1625	0.504587	1.06061
AT1G18160	3516	3234	2971	91.9795	84.4994	2.04	1.35484
AT1G18170	989	812	674	82.1031	68.1496	0.409091	0.6
AT1G18260	2331	2172	2035	93.1789	87.3016	0.894737	1.55556
AT1G18450	1627	1475	1233	90.6577	75.7837	2.86667	1.3
AT1G18460	2460	2215	1733	90.0407	70.4472	2.58824	1.875
AT1G18480	1379	1168	1018	84.6991	73.8216	0.5	0.615385
AT1G18485	3064	2165	2181	70.6593	71.1815	1.375	1.33333
AT1G18500	2060	1916	1774	93.0097	86.1165	0.170886	1
AT1G18540	861	840	784	97.561	91.0569	0.480263	0.628571
AT1G18570	1654	971	1293	58.7062	78.1741	3	1.11111
AT1G18580	2128	1483	1352	69.6898	63.5338	0.333333	1.1
AT1G18590	1363	1230	1133	90.2421	83.1255	0.444444	0.25
AT1G18630	751	439	564	58.4554	75.0999	4	1.33333
AT1G18640	1198	770	670	64.2738	55.9265	2	1
AT1G18710	1119	1145	871	102.324	77.8374	0.65625	0.857143
AT1G18720	913	920	572	100.767	62.6506	1.90476	1.64286
AT1G18810	1435	1295	1015	90.2439	70.7317	0.230769	0.6
AT1G18850	1456	818	791	56.1813	54.3269	0.25	0.428571
AT1G18890	2568	1919	1927	74.7274	75.0389	2.93333	3.14286
AT1G18950	2779	2036	2164	73.2638	77.8697	1.84211	0.555556
AT1G19110	2551	2289	2154	89.7295	84.4375	3.69231	3
AT1G19120	767	649	603	84.6154	78.618	1.16667	0.428571
AT1G19130	857	655	521	76.4294	60.7935	0.555556	2
AT1G19150	1043	866	845	83.0297	81.0163	0.608696	0.947368
AT1G19270	2346	1620	1815	69.0537	77.3657	2.5	3
AT1G19360	1769	1372	1276	77.5579	72.1311	0.692308	1
AT1G19370	2171	1642	1263	75.6333	58.176	0.8	1
AT1G19430	2778	1914	1518	68.8985	54.6436	0.53125	0.625
AT1G19440	1948	1323	1268	67.9158	65.0924	0.88	1.25
AT1G19450	1953	1337	1065	68.4588	54.5315	0.9375	0.777778
AT1G19520	2442	2123	1483	86.9369	60.7289	0.789474	0.727273
AT1G19550	462	354	306	76.6234	66.2338	0.578947	1
AT1G19580	1366	1085	1027	79.429	75.183	0.8	0.833333
AT1G19600	1440	1219	1053	84.6528	73.125	0.3	0.583333
AT1G19670	1281	1166	1018	91.0226	79.4692	3.44444	2.625
AT1G19680	1805	1488	1247	82.4377	69.0859	0.842105	0.470588
AT1G19710	1727	1123	887	65.0261	51.3607	2.6	4.5
AT1G19720	3069	2931	3011	95.5034	98.1101	0.357143	0.871795
AT1G19740	1138	1001	977	87.9613	85.8524	0.126984	0.625
AT1G19770	1396	1188	959	85.1003	68.6963	0.787234	1
AT1G19835	3444	2871	2799	83.3624	81.2718	0.56	0.777778
AT1G19870	2956	2410	2268	81.5291	76.7253	5.77778	1.8
AT1G19910	858	779	744	90.7925	86.7133	1.42857	2.875
AT1G19920	1801	1470	962	81.6213	53.4148	4.25	1.5
AT1G19960	425	425	371	100	87.2941	7	2.42857
AT1G19990	893	516	515	57.7828	57.6708	1.33333	0.666667
AT1G20010	1689	1505	1545	89.106	91.4742	0.623188	1.125
AT1G20050	973	745	709	76.5673	72.8674	4	2.33333
AT1G20090	1219	954	952	78.2609	78.0968	0.222222	1.5
AT1G20110	2132	1799	1494	84.3809	70.075	1.82759	0.4
AT1G20190	1139	815	698	71.554	61.2818	2.9	0.857143
AT1G20200	1804	1461	1535	80.9867	85.0887	5.94737	2.36842
AT1G20225	927	583	673	62.891	72.5998	0.4	0.947368
AT1G20260	1919	1831	1851	95.4143	96.4565	4.0625	1.16071
AT1G20440	1219	1081	1071	88.6792	87.8589	1.125	1.07547
AT1G20580	762	630	583	82.6772	76.5092	0.145455	0.125
AT1G20630	2023	1766	1717	87.2961	84.8739	2.18182	1.89474
AT1G20760	3426	3034	2363	88.5581	68.9726	1.7037	2.1
AT1G20780	2877	2634	2412	91.5537	83.8373	0.432692	1.11111
AT1G20810	917	878	731	95.747	79.7165	0.875	1.5
AT1G20830	1231	959	947	77.9041	76.9293	0.375	0.666667
AT1G20840	2499	2090	2095	83.6335	83.8335	1.14815	1.41667
AT1G20960	6976	6621	6690	94.9111	95.9002	1.32278	0.982759
AT1G20970	4673	4247	3885	90.8838	83.1372	0.31875	0.864865
AT1G20980	4014	3459	3545	86.1734	88.3159	0.122905	0.298077
AT1G21065	799	792	787	99.1239	98.4981	0.275862	0.6
AT1G21100	1384	761	717	54.9855	51.8064	1.90323	1.16667
AT1G21170	3505	2483	1811	70.8417	51.669	0.30303	0.434783
AT1G21190	652	492	564	75.4601	86.5031	1.52381	0.857143
AT1G21200	1736	1163	1247	66.9931	71.8318	1.6	0.4
AT1G21240	2354	1777	1989	75.4885	84.4945	0.853659	0.783784
AT1G21245	501	275	399	54.8902	79.6407	0.166667	0.75
AT1G21250	2675	2401	2454	89.757	91.7383	0.955414	0.952632
AT1G21270	2469	2329	2342	94.3297	94.8562	0.797945	1.1773
AT1G21380	1956	1490	1484	76.1759	75.8691	0.204545	0.409091
AT1G21440	1249	1027	1054	82.2258	84.3875	0.309859	0.45
AT1G21450	2298	1818	1847	79.1123	80.3742	0.761905	1
AT1G21500	617	553	342	89.6272	55.4295	0.362069	0.2
AT1G21520	201	199	193	99.005	96.0199	0.761905	0.363636
AT1G21570	1973	1419	1608	71.9209	81.5003	0.642857	1.4
AT1G21580	5239	4691	4774	89.54	91.1243	0.21164	0.763158
AT1G21590	2860	2577	2265	90.1049	79.1958	0.563107	0.979592
AT1G21630	4317	3799	3152	88.0009	73.0137	0.867925	0.645161
AT1G21640	3308	3028	3068	91.5357	92.7449	0.736264	1.04167
AT1G21651	2755	1746	2007	63.3757	72.8494	0.111111	0.5625
AT1G21660	2027	1762	1779	86.9265	87.7652	1.5	1.13333
AT1G21680	2335	2278	2226	97.5589	95.3319	1.11009	1.18966
AT1G21700	2737	2192	1576	80.0877	57.5813	1.2	0.8
AT1G21720	918	753	791	82.0261	86.1656	2.35	0.789474
AT1G21760	1320	770	878	58.3333	66.5152	0.555556	0.272727
AT1G21900	1125	783	879	69.6	78.1333	1.03704	1.03333
AT1G21920	1727	1355	1485	78.4598	85.9873	9	5.25
AT1G21930	532	365	417	68.609	78.3835	0.166667	2.33333
AT1G22020	2374	1921	2099	80.9183	88.4162	1.07692	0.7
AT1G22040	1838	1240	1326	67.4646	72.1436	0.8	0.272727
AT1G22060	6310	4794	4317	75.9746	68.4152	0.724138	1.36364
AT1G22400	1727	1497	1491	86.6821	86.3347	1.02439	0.626866
AT1G22410	1919	1880	1699	97.9677	88.5357	1.00392	1.35938
AT1G22450	1262	842	797	66.7195	63.1537	1.5	0.5
AT1G22530	2448	2252	1916	91.9935	78.268	1.37838	0.833333
AT1G22570	1698	1541	1081	90.7538	63.6631	2.88889	4
AT1G22610	3298	3182	3192	96.4827	96.7859	3.42857	2.02564
AT1G22620	3109	1972	1806	63.4288	58.0894	2.625	0.777778
AT1G22630	642	528	460	82.243	71.6511	2.66667	2
AT1G22690	554	613	431	110.65	77.7978	2.16667	1.66667
AT1G22710	1956	1702	1655	87.0143	84.6115	5.77895	5.83333
AT1G22730	2574	2103	2131	81.7016	82.7894	1.22222	1.06667
AT1G22740	973	722	534	74.2035	54.8818	0.4	5
AT1G22770	4136	3583	3269	86.6296	79.0377	0.945455	1.52381
AT1G22850	1283	944	946	73.5776	73.7334	5.5625	5.75
AT1G22882	2317	2045	1840	88.2607	79.413	3.6	2
AT1G22940	1774	1405	1189	79.1995	67.0237	5	1
AT1G22950	1490	1078	757	72.349	50.8054	1.42857	3.66667
AT1G22970	1207	745	902	61.7233	74.7307	0.214286	0.857143
AT1G23030	2173	1816	1693	83.5711	77.9107	2.07692	1.18182
AT1G23140	642	339	462	52.8037	71.9626	0.5	0.222222
AT1G23180	2978	2292	1783	76.9644	59.8724	6.6	2.28571
AT1G23190	2112	1919	1823	90.8617	86.3163	3.2381	1.30769
AT1G23220	848	555	439	65.4481	51.7689	4	6
AT1G23230	4889	3924	3257	80.2618	66.6189	0.87037	1.70588
AT1G23260	815	672	665	82.454	81.5951	1.33333	0.461538
AT1G23400	1822	1641	1113	90.0659	61.0867	0.891304	0.611111
AT1G23460	1453	1084	752	74.6043	51.755	0.545455	1.5
AT1G23490	982	897	863	91.3442	87.8819	2.6	4.4
AT1G23710	1176	939	864	79.8469	73.4694	0.916667	0.714286
AT1G23740	1384	1277	1222	92.2688	88.2948	1.3871	1.21311
AT1G23750	843	485	519	57.5326	61.5658	0.25	1
AT1G23840	1080	915	728	84.7222	67.4074	0.466667	2
AT1G23850	1497	1135	1159	75.8183	77.4215	4	2.22222
AT1G24100	1572	1552	1529	98.7277	97.2646	0.706667	0.538462
AT1G24120	1717	1299	970	75.6552	56.4939	1.625	0.692308
AT1G24140	1343	1210	865	90.0968	64.408	1.33333	0.6
AT1G24150	2261	1979	1773	87.5276	78.4166	0.75	0.285714
AT1G24160	2037	1682	1663	82.5724	81.6397	2.38095	1.6875
AT1G24170	1617	1446	1056	89.4249	65.3061	0.22449	0.266667
AT1G24190	4362	3211	3359	73.613	77.006	1.66667	2.52941
AT1G24280	2047	1688	1076	82.4621	52.5647	2.71429	1
AT1G24300	4638	3907	3894	84.2389	83.9586	0.5625	1.36585
AT1G24360	1393	1193	1126	85.6425	80.8327	2.57143	2
AT1G24460	5554	4763	4399	85.758	79.2042	0.891089	0.773585
AT1G24560	2504	2325	2010	92.8514	80.2716	0.411765	1.44444
AT1G24575	493	389	422	78.9047	85.5984	0.2	0.428571
AT1G24706	5913	5030	5080	85.0668	85.9124	1.12174	0.786667
AT1G24800	1592	974	879	61.1809	55.2136	1.4	1.33333
AT1G24881	1599	914	926	57.1607	57.9112	2	1.66667
AT1G25220	1214	644	675	53.0478	55.6013	0.722222	0.888889
AT1G25230	1111	923	572	83.0783	51.4851	2.625	1.25
AT1G25260	1018	646	511	63.4578	50.1965	0.666667	1.14286
AT1G25290	1228	870	616	70.8469	50.1629	5	1.5
AT1G25350	2611	1746	1747	66.8709	66.9092	0.606061	0.714286
AT1G25380	1532	1200	1013	78.329	66.1227	0.454545	0.5
AT1G25390	2132	1938	1898	90.9006	89.0244	0.810811	0.925926
AT1G25400	1269	944	655	74.3893	51.6154	0.666667	1
AT1G25440	1653	1594	1621	96.4307	98.0641	2.45721	2.03876
AT1G25490	2110	1988	1837	94.218	87.0616	0.85	0.64
AT1G25520	1184	928	1010	78.3784	85.3041	0.714286	0.333333
AT1G25550	1396	1264	1206	90.5444	86.3897	3.375	2
AT1G25560	1365	1212	1289	88.7912	94.4322	1.24138	1.33333
AT1G25570	2310	1676	1244	72.5541	53.8528	2.04167	0.6
AT1G25580	1906	1174	1231	61.595	64.5855	1.5	0.571429
AT1G25682	1244	953	696	76.6077	55.9486	1.125	0.25
AT1G26090	1647	1078	849	65.4523	51.5483	0.428571	0.8
AT1G26120	1775	940	899	52.9577	50.6479	0.352941	1.22222
AT1G26130	3555	2703	2958	76.0338	83.2068	1.73077	1.61905
AT1G26210	1073	718	662	66.9152	61.6962	0.142857	1
AT1G26270	2605	1992	2069	76.4683	79.4242	0.28125	1.25
AT1G26380	1792	1411	1510	78.7388	84.2634	2.61538	3.71429
AT1G26460	2310	2055	1392	88.961	60.2597	0.694444	0.875
AT1G26470	655	460	421	70.229	64.2748	0.333333	0.142857
AT1G26550	737	678	665	91.9946	90.2307	0.25641	0.888889
AT1G26560	1777	1709	1169	96.1733	65.785	0.282051	0.555556
AT1G26580	2788	2302	2093	82.5681	75.0717	1.75	4.71429
AT1G26620	2977	1743	2019	58.5489	67.82	0.666667	0.583333
AT1G26650	1472	1087	807	73.8451	54.8234	3	0.444444
AT1G26670	1088	882	883	81.0662	81.1581	1	0.578947
AT1G26690	892	825	619	92.4888	69.3946	0.5	0.6875
AT1G26740	752	424	414	56.383	55.0532	1	0.714286
AT1G26750	879	667	617	75.8817	70.1934	0.333333	0.125
AT1G26761	1421	1381	1365	97.1851	96.0591	0.121693	0.245283
AT1G26830	2572	2358	2375	91.6796	92.3406	0.851852	0.586957
AT1G26920	887	713	610	80.3833	68.7711	0.1875	0.2
AT1G27000	1355	1261	1180	93.0627	87.0849	0.189873	0.5
AT1G27020	1276	1128	1138	88.4013	89.185	0.533333	0.25
AT1G27060	1161	1052	591	90.6115	50.9044	0.714286	0.8
AT1G27090	1562	1507	1386	96.4789	88.7324	1.55396	2.35897
AT1G27100	2090	1892	1924	90.5263	92.0574	8.65625	2.43902
AT1G27190	2169	1744	1823	80.4057	84.0479	0.173913	0.411765
AT1G27200	2202	1826	1480	82.9246	67.2116	0.4	1.11111
AT1G27210	2288	1964	1151	85.8392	50.3059	0.666667	2
AT1G27310	774	682	597	88.1137	77.1318	2.70968	2.52632
AT1G27320	3562	3450	3459	96.8557	97.1084	0.558824	0.763441
AT1G27340	1853	1713	1387	92.4447	74.8516	0.448276	1.875
AT1G27350	497	442	380	88.9336	76.4588	5	3.66667
AT1G27400	841	684	589	81.3317	70.0357	2.7	5
AT1G27430	4730	3534	3391	74.7146	71.6913	0.657143	1.47826
AT1G27480	1509	1250	1272	82.8363	84.2942	3.38095	1.53333
AT1G27510	2230	1983	1687	88.9238	75.6502	0.740741	2.22222
AT1G27520	2132	1505	1583	70.591	74.2495	1.7	1.85714
AT1G27530	771	626	580	81.1933	75.227	4.52381	5.11765
AT1G27630	1529	1154	1115	75.4742	72.9235	0.333333	0.153846
AT1G27690	1659	1274	1375	76.7932	82.8813	0.375	2
AT1G27730	933	772	840	82.7438	90.0322	3.25	3.33333
AT1G27850	4296	3469	2602	80.7495	60.568	0.685714	1.46154
AT1G27950	786	736	720	93.6387	91.6031	1.37778	0.2
AT1G27980	1861	988	1303	53.0897	70.0161	0.666667	0.444444
AT1G28050	1695	1479	1035	87.2566	61.0619	9.9	2.8
AT1G28060	2604	2197	2363	84.3702	90.745	0.847826	1.12121
AT1G28120	1380	795	782	57.6087	56.6667	1	0.4
AT1G28140	1093	1032	894	94.419	81.7932	0.515152	1.28571
AT1G28150	613	443	320	72.2675	52.2023	2.5	1
AT1G28190	1040	850	956	81.7308	91.9231	0.461538	0.857143
AT1G28240	2364	1807	1397	76.4382	59.0948	0.5	1.5
AT1G28320	2437	1872	1696	76.8158	69.5938	0.470588	0.333333
AT1G28340	2178	1918	1621	88.0624	74.4261	0.486486	1
AT1G28350	2638	2120	2029	80.3639	76.9143	4.28571	0.636364
AT1G28380	2202	2021	1839	91.7802	83.515	3.15385	0.714286
AT1G28420	5430	4654	4966	85.709	91.4549	1.36667	1.22222
AT1G28440	3357	2950	2658	87.8761	79.1778	0.686275	0.842105
AT1G28670	1411	1071	831	75.9036	58.8944	0.357143	1.14286
AT1G28680	1655	1531	1396	92.5076	84.3505	4.18182	0.894737
AT1G29050	1415	832	840	58.7986	59.364	0.95	1.5
AT1G29060	796	568	580	71.3568	72.8643	0.5	0.666667
AT1G29070	772	626	531	81.0881	68.7824	0.232558	0.411765
AT1G29150	1570	1479	1456	94.2038	92.7389	0.833333	1
AT1G29220	1365	876	749	64.1758	54.8718	0.222222	0.272727
AT1G29240	2294	1495	1750	65.17	76.286	0.428571	1
AT1G29260	1391	909	968	65.3487	69.5902	0.545455	0.214286
AT1G29340	2424	2160	2299	89.1089	94.8432	0.169811	0.557692
AT1G29350	2963	2338	2291	78.9065	77.3203	0.647059	1.2963
AT1G29370	2860	2275	2003	79.5455	70.035	0.488372	1.4
AT1G29520	775	543	418	70.0645	53.9355	0.6	0.5
AT1G29530	1127	773	600	68.5892	53.2387	2.14286	1
AT1G29550	955	504	628	52.7749	65.7592	2	6
AT1G29660	1353	1318	1282	97.4132	94.7524	0.639098	0.83871
AT1G29670	1326	1201	1232	90.5732	92.911	0.36129	0.954545
AT1G29690	2238	1746	1282	78.0161	57.2833	1.86667	0.846154
AT1G29700	1356	917	877	67.6254	64.6755	0.210526	0.75
AT1G29760	1842	1358	1272	73.7242	69.0554	0.714286	0.571429
AT1G29880	2394	2227	2118	93.0242	88.4712	1.31579	1.92857
AT1G29900	3909	3698	3506	94.6022	89.6905	0.845455	0.865385
AT1G29910	1020	1017	986	99.7059	96.6667	4.84806	1.49608
AT1G29930	1044	1034	1003	99.0421	96.0728	0.443499	0.789591
AT1G29990	740	664	649	89.7297	87.7027	1.6	0.428571
AT1G30000	2344	1826	1444	77.901	61.6041	0.777778	1.33333
AT1G30090	1610	1223	1278	75.9627	79.3789	1.33333	2
AT1G30120	1569	1432	1050	91.2683	66.9216	8.5	5
AT1G30270	2235	1809	1259	80.9396	56.3311	1.71429	0.5
AT1G30360	2600	2376	2344	91.3846	90.1538	0.93913	1.10417
AT1G30410	4818	4511	4430	93.6281	91.9469	0.411765	0.516129
AT1G30420	4488	3523	2648	78.4982	59.0018	0.736842	1.72727
AT1G30440	2193	1749	1463	79.7538	66.7123	0.183673	0.684211
AT1G30470	2939	2704	2398	92.0041	81.5924	1.10526	0.69697
AT1G30480	1609	1206	878	74.9534	54.5681	0.4	2
AT1G30520	1892	1661	1278	87.7907	67.5476	3.36364	0.571429
AT1G30580	1549	1307	1193	84.377	77.0174	5.73333	1.13333
AT1G30610	3021	2689	1996	89.0103	66.0708	2.02632	1.6
AT1G30630	1215	958	937	78.8477	77.1193	0.161765	0.548387
AT1G30640	1922	983	1246	51.1446	64.8283	1	3.33333
AT1G30680	2563	2316	1944	90.3629	75.8486	0.694444	1.44444
AT1G30755	2141	1191	1091	55.6282	50.9575	0.2	0.642857
AT1G30880	616	654	542	106.169	87.987	0.22	0.6
AT1G30900	1896	1753	1767	92.4578	93.1962	1.32353	1.66667
AT1G30910	1121	951	673	84.835	60.0357	0.9	0.25
AT1G31130	1495	1063	934	71.1037	62.4749	0.666667	0.5
AT1G31180	1360	1216	1174	89.4118	86.3235	2.97143	0.511111
AT1G31190	1335	966	948	72.3596	71.0112	0.318182	0.5
AT1G31220	1416	919	990	64.9011	69.9153	2.25	0.333333
AT1G31230	2988	2482	2184	83.0656	73.0924	0.916667	1.25
AT1G31280	3343	2835	3030	84.8041	90.6372	8.07143	1.86667
AT1G31330	951	946	1010	99.4742	106.204	0.191147	0.764505
AT1G31335	480	305	288	63.5417	60	0.666667	0.2
AT1G31340	743	639	586	86.0027	78.8694	3.66667	1.15
AT1G31350	1452	1068	954	73.5537	65.7025	0.392857	0.277778
AT1G31420	2469	2246	2175	90.968	88.0923	0.130208	0.673913
AT1G31440	1870	1028	1176	54.9733	62.8877	8	0.555556
AT1G31480	3138	2299	1760	73.2632	56.0867	0.407407	0.3125
AT1G31650	2255	1917	1543	85.0111	68.4257	1.08696	1.44444
AT1G31690	2034	1916	1036	94.1986	50.9341	1.07843	1.4
AT1G31730	3454	3153	2952	91.2855	85.4661	1.63043	0.913043
AT1G31770	2456	1497	1464	60.9528	59.6091	0.384615	0.571429
AT1G31780	2295	1738	1403	75.7298	61.1329	0.34375	1
AT1G31800	2070	1887	1852	91.1594	89.4686	4	1.88889
AT1G31812	641	575	512	89.7036	79.8752	1.02857	0.810811
AT1G31910	2345	1792	1808	76.4179	77.1002	0.145833	0.571429
AT1G31920	1994	1738	1501	87.1615	75.2758	0.285714	0.4
AT1G31970	1852	1542	1497	83.2613	80.8315	2.61111	3.71429
AT1G32050	1273	1157	1078	90.8877	84.6819	1.13333	0.888889
AT1G32060	1556	1608	1500	103.342	96.401	4.37113	1.19683
AT1G32080	1813	1547	1697	85.3282	93.6018	0.855263	0.730769
AT1G32130	1853	1646	1545	88.8289	83.3783	7.96154	2.82857
AT1G32150	1617	1153	850	71.3049	52.5665	0.444444	0.6
AT1G32160	1403	1347	1235	96.0086	88.0257	1.2	0.75
AT1G32210	654	463	420	70.7951	64.2202	0.105263	0.529412
AT1G32220	1217	938	1083	77.0748	88.9893	0.3125	0.571429
AT1G32340	2480	1724	1632	69.5161	65.8065	6.33333	9.5
AT1G32360	1726	1430	1273	82.8505	73.7543	0.133333	0.3
AT1G32440	1908	1574	1379	82.4948	72.2746	0.346154	1.2
AT1G32450	2195	1334	1454	60.7745	66.2415	1.6	1.6
AT1G32460	659	428	506	64.9469	76.783	1	1.5
AT1G32470	791	777	655	98.2301	82.8066	1.76596	0.485714
AT1G32490	3652	2583	2052	70.7284	56.1884	1.23077	1.61538
AT1G32500	1808	1679	1649	92.865	91.2058	4.21429	1.2
AT1G32520	939	777	736	82.7476	78.3813	0.56	0.785714
AT1G32530	2424	2230	2114	91.9967	87.2112	1.08571	1.09091
AT1G32580	948	856	495	90.2954	52.2152	0.625	2
AT1G32640	2179	1998	2051	91.6934	94.1257	5.09804	1.40541
AT1G32750	5898	4727	4705	80.1458	79.7728	1.26	1
AT1G32810	3207	2737	2685	85.3446	83.7231	0.456522	0.5
AT1G32900	2192	1878	1877	85.6752	85.6296	0.382716	0.57971
AT1G32940	2485	2029	2325	81.6499	93.5614	0.857143	1.89286
AT1G32990	856	792	505	92.5234	58.9953	2.30769	0.333333
AT1G33040	854	801	697	93.7939	81.6159	0.47619	0.666667
AT1G33140	951	811	868	85.2787	91.2723	4.44444	4.33333
AT1G33230	1519	1076	1213	70.8361	79.8552	1.11111	1.33333
AT1G33240	2624	2231	2400	85.0229	91.4634	0.276786	0.615385
AT1G33250	2060	1461	1044	70.9223	50.6796	1.33333	2.33333
AT1G33390	3970	2465	2368	62.0907	59.6474	0.555556	1
AT1G33420	2501	1693	1539	67.6929	61.5354	1.375	1.9
AT1G33520	1798	1558	1575	86.6518	87.5973	0.428571	1
AT1G33560	2815	2210	1994	78.508	70.8348	0.6875	1.22222
AT1G33590	1637	1499	1449	91.5699	88.5156	1.33333	0.608696
AT1G33600	1588	1372	839	86.398	52.8338	1.8	1.66667
AT1G33680	2819	2516	2330	89.2515	82.6534	2.38462	0.8
AT1G33720	1615	1291	1408	79.9381	87.1827	0.36	0.533333
AT1G33780	1346	1128	863	83.8039	64.1159	2.8	3.83333
AT1G33810	660	550	488	83.3333	73.9394	0.137931	0.172414
AT1G34000	824	689	566	83.6165	68.6893	0.565217	2
AT1G34030	767	602	553	78.4876	72.0991	1.23077	0.809524
AT1G34130	2520	2314	2198	91.8254	87.2222	0.521739	0.769231
AT1G34190	2180	1883	1982	86.3761	90.9174	0.289855	0.5
AT1G34260	4741	3892	3923	82.0924	82.7463	0.878505	1.36735
AT1G34300	2643	2027	2151	76.6932	81.3848	2.23529	2.54545
AT1G34320	2718	2298	1784	84.5475	65.6365	0.482759	0.47619
AT1G34420	2901	1922	1802	66.253	62.1165	3.83333	3.4
AT1G34470	1656	1217	886	73.4903	53.5024	2	0.6
AT1G34570	1026	646	586	62.963	57.115	0.888889	1.16667
AT1G35210	751	498	402	66.3116	53.5286	3	4
AT1G35420	1168	986	960	84.4178	82.1918	4	5
AT1G35460	1151	768	704	66.7246	61.1642	3.5	1
AT1G35620	1646	1332	1283	80.9235	77.9465	0.243243	0.857143
AT1G35670	1757	1421	1556	80.8765	88.56	0.484848	0.666667
AT1G35680	876	780	770	89.0411	87.8995	0.283582	0.846154
AT1G36160	7031	6811	6464	96.871	91.9357	0.843003	0.706522
AT1G36280	1785	1168	1020	65.4342	57.1429	0.333333	0.4
AT1G36320	1466	1416	1418	96.5894	96.7258	1.05882	0.468085
AT1G36370	2058	1899	1866	92.2741	90.6706	0.352941	0.780488
AT1G36980	678	552	606	81.4159	89.3805	3.8	3.25
AT1G36990	2837	2009	2017	70.8142	71.0962	5.4	4.5
AT1G37130	3130	3030	3041	96.8051	97.1565	1.69257	1.42365
AT1G41830	2068	1813	1633	87.6692	78.9652	2.57282	4
AT1G41880	729	532	411	72.9767	56.3786	0.272727	0.166667
AT1G42440	2741	2056	1498	75.0091	54.6516	1.15	1.55556
AT1G42540	2802	2374	1677	84.7252	59.8501	1.35714	0.7
AT1G42550	2867	2533	2641	88.3502	92.1172	1.44545	1.21212
AT1G42970	1774	1693	1633	95.434	92.0519	0.464974	0.704188
AT1G42990	1102	1015	1024	92.1053	92.922	1	0.94
AT1G43670	1319	1205	1028	91.3571	77.9378	0.241379	0.153846
AT1G43690	2320	1982	1951	85.431	84.0948	0.26087	0.857143
AT1G43700	1371	1252	1269	91.3202	92.5602	3.5	1
AT1G43710	1749	1594	1459	91.1378	83.4191	2.37778	0.433333
AT1G43790	523	424	349	81.0707	66.7304	1	0.666667
AT1G43860	1373	934	933	68.0262	67.9534	0.45	0.461538
AT1G43900	1249	1198	1227	95.9167	98.2386	2.33333	2.5
AT1G43910	1624	1514	1539	93.2266	94.766	5.33333	2.52
AT1G44000	1108	1041	955	93.9531	86.1913	0.252101	0.166667
AT1G44100	2151	1359	1212	63.1799	56.3459	3.71429	9
AT1G44350	2019	1269	1060	62.8529	52.5012	0.4	0.928571
AT1G44800	1585	1065	1150	67.1924	72.5552	1.6	0.95
AT1G44810	1279	1025	811	80.1407	63.4089	1	1
AT1G44920	1113	996	835	89.4879	75.0225	2.83871	2.16667
AT1G45050	773	627	607	81.1125	78.5252	0.714286	0.857143
AT1G45145	753	546	636	72.51	84.4622	1.55224	5.67857
AT1G47056	1557	1508	1370	96.8529	87.9897	0.657895	1.90476
AT1G47240	1922	1245	963	64.7763	50.1041	2.88889	1.33333
AT1G47260	1185	1137	1087	95.9494	91.73	0.131313	0.262295
AT1G47310	1540	1251	1068	81.2338	69.3506	2	1.66667
AT1G47330	1819	1354	1457	74.4365	80.099	0.538462	1.07692
AT1G47410	788	627	458	79.5685	58.1218	1.09091	2
AT1G47420	1109	926	986	83.4986	88.9089	1.69565	1.07692
AT1G47500	1728	1620	1457	93.75	84.3171	1.66667	0.25
AT1G47550	2664	2293	2280	86.0736	85.5856	3.30769	1.36364
AT1G47560	2664	1454	1566	54.5796	58.7838	1	1.75
AT1G47830	819	577	494	70.4518	60.3175	0.8	2
AT1G48040	1619	991	1038	61.2106	64.1137	0.375	0.2
AT1G48050	2273	1797	1402	79.0585	61.6806	7.08333	3.125
AT1G48230	1385	1042	705	75.2347	50.9025	1.25	1
AT1G48300	1119	1114	1053	99.5532	94.1019	2	1.89286
AT1G48320	820	534	475	65.122	57.9268	2	0.545455
AT1G48350	705	630	607	89.3617	86.0993	2.25424	0.722222
AT1G48420	1377	1145	1100	83.1518	79.8838	0.925926	0.676471
AT1G48430	2137	1106	1415	51.7548	66.2143	5	1
AT1G48480	2294	2087	1723	90.9765	75.109	1.90299	1
AT1G48570	1603	978	883	61.0106	55.0842	2.75	0.571429
AT1G48598	1963	1724	1680	87.8248	85.5833	7.83333	2.14286
AT1G48620	1979	1776	1357	89.7423	68.57	2.37209	0.55
AT1G48630	1244	1114	784	89.5498	63.0225	1.78571	1.42857
AT1G48745	736	381	370	51.7663	50.2717	1	2
AT1G48920	1966	1933	1902	98.3215	96.7447	0.298319	0.791946
AT1G48950	2080	1217	1170	58.5096	56.25	0.363636	0.875
AT1G48960	937	730	501	77.9082	53.4685	0.3	0.111111
AT1G49010	1161	1054	955	90.7838	82.2567	0.205128	0.384615
AT1G49032	738	581	664	78.7263	89.9729	2.5	1.30769
AT1G49200	942	824	566	87.4735	60.0849	0.8	1
AT1G49240	1707	1523	1427	89.2209	83.597	0.235294	0.75
AT1G49380	2055	1636	1623	79.6107	78.9781	0.521739	1.14286
AT1G49410	501	377	288	75.2495	57.485	0.842105	3.2
AT1G49600	1688	1390	960	82.346	56.872	0.191489	0.6
AT1G49710	2004	1476	1196	73.6527	59.6806	1.25	1
AT1G49720	1606	1369	1152	85.2428	71.731	2.57143	1.71429
AT1G49750	1755	1603	1624	91.339	92.5356	1.2	0.8
AT1G49760	2570	2380	1997	92.607	77.7043	1.63492	0.894737
AT1G49780	1414	1079	819	76.3083	57.9208	2.33333	1.375
AT1G49970	1677	1310	1350	78.1157	80.5009	0.247788	0.427184
AT1G49975	599	529	460	88.3139	76.7947	0.333333	0.142857
AT1G49980	2734	1936	1389	70.812	50.8047	0.261905	0.666667
AT1G50010	1775	1536	1321	86.5352	74.4225	1.10345	5.33333
AT1G50020	923	514	570	55.688	61.7551	3	1.5
AT1G50120	2229	1124	1240	50.4262	55.6303	1.4	1.75
AT1G50170	951	787	741	82.755	77.918	1.375	2.33333
AT1G50180	2574	2014	1841	78.244	71.5229	0.227273	0.25
AT1G50200	3407	2849	2805	83.622	82.3305	2.08654	1.38182
AT1G50250	2473	2389	2361	96.6033	95.4711	0.721271	1.00637
AT1G50260	2334	1480	1211	63.4105	51.8852	1.27273	2.83333
AT1G50300	1488	1002	996	67.3387	66.9355	1	1.75
AT1G50320	843	707	709	83.8671	84.1044	2.33929	1.46939
AT1G50360	4149	3076	2450	74.1383	59.0504	2.25	2
AT1G50370	1461	1416	1177	96.9199	80.5613	0.7	0.333333
AT1G50380	2597	2183	1902	84.0585	73.2384	0.5	0.8
AT1G50410	3326	2571	2150	77.3001	64.6422	4.625	1.84615
AT1G50420	1951	1214	1423	62.2245	72.937	1.57143	0.615385
AT1G50460	2074	1800	1258	86.7888	60.6557	0.324324	0.545455
AT1G50480	2269	2038	2046	89.8193	90.1719	0.727273	1.15385
AT1G50510	1379	950	777	68.8905	56.3452	1	1.33333
AT1G50520	1754	1066	1111	60.7754	63.3409	1.5	1
AT1G50600	2060	1724	1718	83.6893	83.3981	5.16667	3.5
AT1G50620	2223	1542	1429	69.3657	64.2825	2	1.875
AT1G50660	2928	2454	2544	83.8115	86.8852	6.7	1.68
AT1G50670	1048	631	580	60.2099	55.3435	1.33333	0.111111
AT1G50740	788	577	452	73.2234	57.3604	0.8	1.33333
AT1G50840	3569	3299	2997	92.4349	83.9731	1.06667	0.967742
AT1G50920	2394	2153	2212	89.9332	92.3977	1.08889	1.27586
AT1G51070	1061	914	702	86.1451	66.164	4	2
AT1G51110	1462	1341	1418	91.7237	96.9904	0.276596	0.888889
AT1G51140	1625	1133	978	69.7231	60.1846	1	1.375
AT1G51350	2441	1538	1423	63.007	58.2958	1.61538	1.83333
AT1G51360	717	494	478	68.8982	66.6667	1.75	1.5
AT1G51390	1252	922	821	73.6422	65.5751	0.6	0.166667
AT1G51440	1782	1069	1334	59.9888	74.8597	1.71429	0.75
AT1G51450	1858	1498	986	80.6243	53.0678	0.625	0.4
AT1G51500	2342	2057	2120	87.8309	90.5209	0.560241	0.777778
AT1G51510	979	867	871	88.5598	88.9683	8.26667	3.15385
AT1G51570	2519	2448	2262	97.1814	89.7975	2.33333	1.14815
AT1G51580	1954	1582	1212	80.9621	62.0266	1.26316	5
AT1G51630	1652	945	973	57.2034	58.8983	2.55556	1
AT1G51660	1625	1196	1301	73.6	80.0615	0.666667	1.2
AT1G51700	1120	883	880	78.8393	78.5714	4.4	3.5
AT1G51720	2469	2153	1975	87.2013	79.9919	1.11538	1.35714
AT1G51730	1229	723	624	58.8283	50.773	0.222222	0.25
AT1G51760	1684	1390	1578	82.5416	93.7055	1.08333	0.961538
AT1G51805	2964	2596	2563	87.5843	86.471	1.96591	2.32911
AT1G51890	2667	1410	1797	52.8684	67.3791	0.433333	0.530612
AT1G52000	2451	2376	1679	96.94	68.5027	5.45794	1.16667
AT1G52190	2284	2112	1876	92.4694	82.1366	1.16129	4.88889
AT1G52200	898	678	573	75.5011	63.8085	0.4	0.346154
AT1G52230	664	655	632	98.6446	95.1807	9.59524	1.82432
AT1G52290	1835	1367	1131	74.4959	61.6349	0.111111	0.545455
AT1G52300	685	443	492	64.6715	71.8248	0.411765	0.766667
AT1G52310	1978	1586	1446	80.182	73.1041	1.11111	0.5
AT1G52360	3423	3311	3319	96.728	96.9617	0.574803	1.04545
AT1G52380	1725	1470	1266	85.2174	73.3913	0.470588	0.7
AT1G52420	2611	2261	2405	86.5952	92.1103	0.742424	0.785714
AT1G52590	776	569	678	73.3247	87.3711	5.85714	2.76923
AT1G52600	877	548	727	62.4857	82.8962	1	1.14286
AT1G52740	807	701	584	86.8649	72.3668	5.625	4.33333
AT1G52760	1219	1048	1010	85.9721	82.8548	2.66667	2.57143
AT1G52780	3539	2812	2888	79.4575	81.605	0.208955	0.942857
AT1G52930	1114	936	739	84.0215	66.3375	0.692308	0.454545
AT1G52980	1939	1813	1766	93.5018	91.0779	1.47826	1.16
AT1G53050	2830	1823	1571	64.417	55.5124	2.11111	2.83333
AT1G53120	1177	926	819	78.6746	69.5837	0.153846	0.714286
AT1G53210	2219	1882	1887	84.813	85.0383	0.512821	0.875
AT1G53240	1512	1295	1163	85.6481	76.918	1.06024	0.442308
AT1G53280	1537	1412	1241	91.8673	80.7417	1.24324	0.607143
AT1G53320	1438	1041	1104	72.3922	76.7733	0.6	1.0625
AT1G53350	2784	1849	1537	66.4152	55.2083	2.75	3.6
AT1G53390	3708	2982	2548	80.4207	68.7163	1.04348	0.6875
AT1G53400	833	589	537	70.7083	64.4658	0.8	1
AT1G53440	3108	2963	2572	95.3346	82.7542	0.754717	0.5
AT1G53500	2526	2121	1918	83.9667	75.9303	1.05405	3
AT1G53541	111	75	93	67.5676	83.7838	0.5	1
AT1G53560	651	478	427	73.4255	65.5914	0.576923	0.47619
AT1G53645	1907	1367	1032	71.6833	54.1164	0.107143	0.538462
AT1G53720	1770	1495	1194	84.4633	67.4576	3.6	4
AT1G53750	1630	1445	1294	88.6503	79.3865	3	4.33333
AT1G53840	2058	1946	1907	94.5578	92.6628	0.458824	2.3
AT1G54030	1434	1024	1292	71.4086	90.0976	0.84	1.33333
AT1G54060	1646	1228	1219	74.6051	74.0583	0.129032	0.3
AT1G54090	2334	1749	1681	74.9357	72.0223	0.916667	1.14286
AT1G54115	2060	1731	1716	84.0291	83.301	5.16667	1.22222
AT1G54130	2633	2121	2369	80.5545	89.9734	2.70588	2.18519
AT1G54150	1386	1022	765	73.7374	55.1948	0.8	0.214286
AT1G54170	2267	1391	1416	61.3586	62.4614	0.409091	1.83333
AT1G54210	631	441	428	69.8891	67.8288	0.666667	5.5
AT1G54320	1412	1163	1249	82.3654	88.4561	0.382353	0.35
AT1G54340	1571	1324	1257	84.2775	80.0127	1.2	1.71429
AT1G54350	2312	2275	2057	98.3997	88.9706	0.573529	0.785714
AT1G54380	1879	1119	1001	59.553	53.273	0.764706	1.125
AT1G54440	2281	1764	1602	77.3345	70.2324	1.19048	1.18182
AT1G54460	1465	1060	881	72.3549	60.1365	0.174603	0.458333
AT1G54490	3219	2960	2919	91.954	90.6803	0.47619	1
AT1G54500	835	721	741	86.3473	88.7425	0.186275	0.45
AT1G54520	1480	1325	1397	89.527	94.3919	1.86364	4
AT1G54575	651	588	588	90.3226	90.3226	0.230769	0.388889
AT1G54580	881	747	486	84.79	55.1646	1.16667	3
AT1G54710	3335	2323	1762	69.6552	52.8336	0.6	1
AT1G54740	1218	911	622	74.7947	51.0673	0.210526	0.2
AT1G54780	1163	1058	1074	90.9716	92.3474	2.4	1.56667
AT1G54820	1531	1348	1136	88.047	74.1999	1.95238	3
AT1G54850	898	540	504	60.1336	56.1247	0.5	0.6
AT1G54990	1660	1161	1019	69.9398	61.3855	0.428571	0.555556
AT1G55090	2762	2451	2299	88.74	83.2368	0.252252	0.810811
AT1G55110	1580	1273	1248	80.5696	78.9873	5.42857	1.44444
AT1G55150	1839	1313	1192	71.3975	64.8178	6	4
AT1G55170	1219	1002	626	82.1985	51.3536	1.2	2
AT1G55210	840	737	640	87.7381	76.1905	7	5.5
AT1G55270	1895	1498	955	79.0501	50.3958	2.83333	9
AT1G55325	6267	4940	3757	78.8256	59.9489	2.15789	0.73913
AT1G55360	1797	1432	968	79.6884	53.8676	4.03448	2.16667
AT1G55460	1547	1177	1203	76.0827	77.7634	1.85714	1.22222
AT1G55480	1342	1230	1212	91.6542	90.313	0.216667	1.23256
AT1G55500	2484	1848	1672	74.3961	67.3108	3.6	3.16667
AT1G55670	780	754	689	96.6667	88.3333	0.101064	0.213235
AT1G55680	1960	1805	1780	92.0918	90.8163	0.454545	0.555556
AT1G55805	717	429	369	59.8326	51.4644	0.25	0.333333
AT1G55850	2311	2076	2189	89.8312	94.7209	1.02439	0.5
AT1G55860	12017	10274	10810	85.4955	89.9559	2.3	1.19231
AT1G55900	1534	1166	1046	76.0104	68.1877	0.8	0.666667
AT1G55910	1196	997	1114	83.3612	93.1438	0.130435	0.448276
AT1G55920	1332	1009	891	75.7508	66.8919	3.13043	3.75
AT1G55960	1723	1459	1534	84.6779	89.0308	1.13333	1.0119
AT1G56000	1588	1330	993	83.7531	62.5315	5.5	1
AT1G56050	1500	1317	896	87.8	59.7333	0.6	0.5
AT1G56090	1285	921	752	71.6732	58.5214	1.36364	1.66667
AT1G56110	1782	1652	1516	92.7048	85.073	0.49	0.245283
AT1G56150	555	471	494	84.8649	89.009	5	2.2
AT1G56180	1526	1204	914	78.8991	59.8952	0.375	1.33333
AT1G56280	1178	1049	1034	89.0492	87.7759	9.375	2.47368
AT1G56290	2416	1788	1493	74.0066	61.7964	3	2.5
AT1G56330	943	872	851	92.4708	90.2439	0.510638	0.491525
AT1G56423	1257	814	722	64.7574	57.4383	0.5	1
AT1G56450	1042	877	933	84.1651	89.5393	0.6	0.548387
AT1G56460	1837	1516	1691	82.5259	92.0523	1.5	0.625
AT1G56500	3428	3316	3341	96.7328	97.4621	0.5	0.307692
AT1G56510	3657	3309	3556	90.484	97.2382	0.880597	0.617978
AT1G56520	3540	2530	2208	71.4689	62.3729	0.666667	0.789474
AT1G56560	2109	1613	1263	76.4817	59.8862	1.07143	0.555556
AT1G57620	1004	543	514	54.0837	51.1952	1.5	2.5
AT1G57765	743	589	381	79.2732	51.2786	1	1
AT1G57860	669	673	535	100.598	79.9701	1.78462	0.705882
AT1G58030	2371	2110	1695	88.992	71.4888	1.86207	0.56
AT1G58080	1595	1440	1077	90.2821	67.5235	0.2375	0.75
AT1G58225	702	477	568	67.9487	80.9117	0.75	0.714286
AT1G58227	4155	3138	3521	75.5235	84.7413	0.657143	0.774194
AT1G58230	3843	3170	2857	82.4876	74.343	0.875	0.892857
AT1G58235	225	154	125	68.4444	55.5556	0.5	2
AT1G58250	8335	6744	5906	80.9118	70.8578	0.73913	0.860465
AT1G58360	1740	1492	1644	85.7471	94.4828	7.70588	1.68182
AT1G58440	1892	1719	1291	90.8562	68.2347	5.1	0.833333
AT1G58684	1126	1028	827	91.2966	73.4458	6.09091	1.6
AT1G58983	1126	941	867	83.5702	76.9982	0.142857	0.909091
AT1G59124	3626	2375	2703	65.4992	74.545	0.212598	0.296
AT1G59218	3765	2456	2299	65.2324	61.0624	0.271318	0.252252
AT1G59610	3261	3005	3073	92.1496	94.2349	0.675676	1.5
AT1G59620	2808	2443	2251	87.0014	80.1638	0.771429	2.38462
AT1G59700	1064	838	779	78.7594	73.2143	1.16667	0.444444
AT1G59760	3158	2337	1879	74.0025	59.4997	0.62	0.8
AT1G59820	4184	3596	3703	85.9465	88.5038	1.34375	1.51515
AT1G59870	4759	4695	4606	98.6552	96.785	2.43487	1.06171
AT1G59890	4149	3320	3014	80.0193	72.644	0.821429	0.941176
AT1G59900	1468	1304	1318	88.8283	89.782	0.425	0.233333
AT1G59910	3006	2025	1734	67.3653	57.6846	0.16	1.42857
AT1G59930	399	406	225	101.754	56.391	0.590909	1.5
AT1G59990	2052	1684	1334	82.0663	65.0097	0.214286	1.42857
AT1G60010	965	840	709	87.0466	73.4715	2.11765	0.8
AT1G60070	3158	2344	1829	74.2242	57.9164	1.09091	2.57143
AT1G60140	3146	2461	2106	78.2263	66.9421	0.916667	0.791667
AT1G60160	2700	1772	1515	65.6296	56.1111	0.933333	0.888889
AT1G60170	1819	1390	1681	76.4156	92.4134	0.472222	1.6
AT1G60200	2896	2241	1786	77.3826	61.6713	6.25	0.4
AT1G60220	2016	1607	1560	79.7123	77.381	1.17647	2.25
AT1G60420	1992	1740	1903	87.3494	95.5321	2.04545	1.78261
AT1G60440	1481	849	772	57.3261	52.1269	5	2.2
AT1G60490	2790	2209	2085	79.1756	74.7312	2.44444	1.42857
AT1G60550	1308	1046	1043	79.9694	79.7401	3.04545	0.947368
AT1G60710	1492	1354	1107	90.7507	74.1957	4.13043	2.11765
AT1G60770	1800	1657	1176	92.0556	65.3333	0.214286	0.5
AT1G60780	1897	1437	1218	75.7512	64.2066	0.642857	0.235294
AT1G60870	1111	789	761	71.0171	68.4968	5.5	3
AT1G60890	3042	1627	1686	53.4845	55.4241	0.357143	0.888889
AT1G60900	2085	1730	1783	82.9736	85.5156	0.941176	1.82143
AT1G60960	1532	952	895	62.141	58.4204	0.818182	2
AT1G60989	477	361	264	75.6813	55.3459	0.4	0.2
AT1G61030	2896	1978	1512	68.3011	52.2099	1.09091	1.625
AT1G61040	2353	1967	1469	83.5954	62.4309	0.714286	1.42857
AT1G61100	2869	2410	2269	84.0014	79.0868	5.42857	2.44444
AT1G61190	2904	2334	2473	80.3719	85.1584	0.25	0.20339
AT1G61210	4179	3588	3422	85.8579	81.8856	0.560976	0.694444
AT1G61250	1247	939	1056	75.3007	84.6832	1.54545	0.34375
AT1G61260	1409	948	816	67.2818	57.9134	0.823529	1.5
AT1G61300	2635	1728	1413	65.5787	53.6243	0.263158	0.142857
AT1G61350	2013	1896	1412	94.1878	70.1441	2	1
AT1G61380	2743	2034	1783	74.1524	65.0018	2.61905	1.11111
AT1G61420	2563	1297	1358	50.6048	52.9848	0.708333	0.789474
AT1G61570	499	368	351	73.7475	70.3407	1.61111	1.33333
AT1G61620	1264	784	1018	62.0253	80.538	7	1.71429
AT1G61670	1813	1428	968	78.7645	53.3922	0.1875	0.545455
AT1G61690	3811	3121	3148	81.8945	82.603	0.457143	0.302326
AT1G61740	1726	1576	1465	91.3094	84.8783	1.87805	1.34043
AT1G61780	641	406	405	63.3385	63.1825	7	6.5
AT1G61790	1041	831	980	79.8271	94.1402	0.387097	1.28571
AT1G61850	4065	3292	2392	80.984	58.8438	0.888889	0.647059
AT1G61870	1612	1192	830	73.9454	51.4888	3.75	1.66667
AT1G62020	4098	3695	3587	90.1659	87.5305	0.753425	0.901961
AT1G62200	1909	1350	1210	70.7177	63.384	0.205128	0.727273
AT1G62300	1990	1467	1554	73.7186	78.0905	6.88889	2.4
AT1G62310	2652	1892	2015	71.3424	75.9804	5.125	1.4
AT1G62380	1318	1184	1170	89.8331	88.7709	2.05128	1.66129
AT1G62390	2835	2653	2487	93.5802	87.7249	1.125	0.837838
AT1G62422	895	707	633	78.9944	70.7263	0.333333	0.5
AT1G62540	1740	1077	989	61.8966	56.8391	0.4	0.5
AT1G62560	1576	1462	1438	92.7665	91.2437	0.443038	0.866667
AT1G62600	1532	1342	1220	87.5979	79.6345	3.22222	7.66667
AT1G62630	2682	1803	1920	67.226	71.5884	0.183673	0.1875
AT1G62660	2428	2009	1562	82.743	64.3328	0.307692	0.5
AT1G62740	1949	1908	1925	97.8964	98.7686	1.08929	2.22222
AT1G62750	2666	2610	2650	97.8995	99.3998	3.22267	1.79688
AT1G62780	957	886	810	92.581	84.6395	3	1.57143
AT1G62810	2860	1853	1856	64.7902	64.8951	0.615385	1.8
AT1G62830	2713	2241	1665	82.6023	61.3712	0.318182	0.357143
AT1G62840	911	585	543	64.2151	59.6048	7	0.666667
AT1G62960	1845	1579	1240	85.5827	67.2087	0.5	0.857143
AT1G63050	1688	853	872	50.5332	51.6588	4.5	2.33333
AT1G63090	1332	1072	1040	80.4805	78.0781	1.5	3
AT1G63170	1606	1251	1058	77.8954	65.878	0.409091	0.733333
AT1G63350	2697	2295	2418	85.0945	89.6552	3.35714	3.05556
AT1G63360	2655	2329	2541	87.7213	95.7062	7.33333	3.46429
AT1G63390	394	331	326	84.0102	82.7411	0.5	0.222222
AT1G63430	2602	2022	1913	77.7095	73.5204	0.393939	0.291667
AT1G63500	2289	1792	1803	78.2875	78.768	1.71429	1.07692
AT1G63680	2721	2659	2166	97.7214	79.6031	0.923077	1.05882
AT1G63700	3275	2430	2311	74.1985	70.5649	1.21569	1.7037
AT1G63850	1647	1632	1079	99.0893	65.5131	1.14286	0.8
AT1G63880	3369	2534	2892	75.2152	85.8415	3.29167	3.375
AT1G63900	1584	1292	995	81.5657	62.8157	0.357143	0.230769
AT1G64050	2545	1930	1599	75.835	62.8291	4	2.375
AT1G64090	1107	866	893	78.2294	80.6685	0.307692	0.15625
AT1G64105	593	512	352	86.3406	59.3592	0.285714	0.285714
AT1G64140	2743	2478	2388	90.339	87.058	0.438095	1.90476
AT1G64142	2743	2542	2292	92.6723	83.5581	1.86957	1
AT1G64190	1809	1398	1274	77.2803	70.4256	1	0.75
AT1G64280	2522	1973	2136	78.2316	84.6947	0.625	0.534483
AT1G64350	1275	938	723	73.5686	56.7059	0.380952	0.6
AT1G64360	563	548	457	97.3357	81.1723	5	9.33333
AT1G64370	742	719	731	96.9003	98.5175	6.9375	1.91489
AT1G64385	1565	1200	1312	76.6773	83.8339	1.83333	2.375
AT1G64400	2304	1514	1284	65.7118	55.7292	1.0625	0.333333
AT1G64440	1453	842	947	57.9491	65.1755	6	1.33333
AT1G64490	581	433	565	74.5267	97.2461	1.33333	2
AT1G64500	1260	1282	1221	101.746	96.9048	0.197849	1.4717
AT1G64510	864	736	685	85.1852	79.2824	0.126582	0.475
AT1G64520	1079	1025	966	94.9954	89.5273	4.73684	2.64286
AT1G64550	2464	2311	2237	93.7906	90.7873	2.19277	1.33333
AT1G64570	3720	3248	3161	87.3118	84.9731	3.03704	1.68
AT1G64660	1628	1420	1126	87.2236	69.1646	6.42857	1.11111
AT1G64720	1577	1453	1575	92.137	99.8732	0.221493	0.19555
AT1G64740	1652	1588	1561	96.1259	94.4915	1.21875	1.66667
AT1G64780	1861	1499	1168	80.5481	62.762	0.583333	1.38889
AT1G64790	8247	6601	5228	80.0412	63.3927	0.503817	1.17073
AT1G64850	678	536	469	79.056	69.174	0.888889	0.272727
AT1G64880	1985	1713	1498	86.2972	75.466	1.13636	1.71429
AT1G64900	1770	1718	1713	97.0621	96.7797	2.52041	1.73333
AT1G64970	1415	1239	1144	87.5618	80.8481	0.52459	0.657895
AT1G65010	4288	4106	3493	95.7556	81.4599	1.34286	1.06897
AT1G65020	1233	734	745	59.5296	60.4217	0.5	0.666667
AT1G65220	1500	1208	1298	80.5333	86.5333	3.625	0.75
AT1G65260	1341	1276	1348	95.1529	100.522	0.247525	0.575
AT1G65280	2132	1549	1568	72.6548	73.546	0.191489	0.466667
AT1G65290	696	507	435	72.8448	62.5	1.22222	3
AT1G65295	573	440	349	76.7888	60.9075	0.181818	0.2
AT1G65320	1865	1169	1219	62.681	65.3619	1.83333	1.64286
AT1G65410	1494	1042	1007	69.7456	67.4029	1.35714	1.6
AT1G65430	2048	1531	1114	74.7559	54.3945	0.814815	0.266667
AT1G65540	2211	1725	1692	78.019	76.5265	0.444444	0.689655
AT1G65580	3729	3314	3080	88.871	82.5959	0.366337	0.449275
AT1G65590	1922	1399	1511	72.7888	78.616	0.666667	0.444444
AT1G65660	1857	1429	1257	76.9521	67.6898	2	2.5
AT1G65690	1026	528	689	51.462	67.154	1.25	1.36364
AT1G65790	2532	2502	2525	98.8152	99.7235	2.01887	1.54667
AT1G65800	2781	2471	2324	88.8529	83.5671	1.85	0.770833
AT1G65840	2183	1826	1509	83.6464	69.1251	0.727273	0.153846
AT1G65860	1591	1416	838	89.0006	52.6713	0.221154	0.636364
AT1G65930	1703	1694	1546	99.4715	90.781	0.505882	1.31746
AT1G66070	1199	686	736	57.2143	61.3845	0.857143	1.2
AT1G66140	1250	863	674	69.04	53.92	0.357143	0.166667
AT1G66150	3257	2773	2959	85.1397	90.8505	9.16667	3.11111
AT1G66190	1144	935	659	81.7308	57.6049	0.916667	1
AT1G66230	1186	828	897	69.8145	75.6324	0.25	0.333333
AT1G66260	1310	924	783	70.5344	59.771	0.116279	0.163934
AT1G66340	2774	2170	1923	78.2264	69.3223	1.29412	1.25
AT1G66350	1849	1631	1291	88.2098	69.8215	2.25926	1.11111
AT1G66410	779	712	706	91.3992	90.629	3	3.15
AT1G66580	882	867	873	98.2993	98.9796	0.158273	0.156463
AT1G66670	1196	1072	1045	89.6321	87.3746	0.921569	2.02778
AT1G66680	1438	942	901	65.5076	62.6565	1.8	1.53333
AT1G66820	512	372	315	72.6562	61.5234	1.25	1
AT1G66840	1824	1518	1534	83.2237	84.1009	0.213333	0.25
AT1G66890	557	490	433	87.9713	77.7379	2.5	2.33333
AT1G66900	1398	1112	818	79.5422	58.5122	6.5	2
AT1G66910	2006	1712	1670	85.344	83.2502	0.727273	1.125
AT1G66920	1830	1723	1585	94.153	86.612	1.75	0.842105
AT1G66970	2597	2273	2404	87.5241	92.5683	3.93243	2.85366
AT1G67120	16176	8204	8410	50.7171	51.9906	0.459677	0.554217
AT1G67170	1561	1206	906	77.2582	58.0397	0.75	0.3
AT1G67190	1513	925	947	61.1368	62.5909	2.28571	0.666667
AT1G67230	3981	3777	3572	94.8757	89.7262	3.55172	1.73333
AT1G67250	681	440	367	64.6109	53.8913	0.357143	0.444444
AT1G67310	3051	2379	2152	77.9744	70.5343	2.72222	1.63158
AT1G67325	1261	874	724	69.3101	57.4148	1.73913	2.5
AT1G67440	1571	1253	858	79.7581	54.6149	1.8	0.8
AT1G67550	3103	2727	2255	87.8827	72.6716	1.2973	2.6
AT1G67560	2928	2333	2084	79.679	71.1749	0.475	1.58333
AT1G67680	2263	1715	1751	75.7844	77.3752	0.766667	0.344828
AT1G67720	3160	2177	2456	68.8924	77.7215	0.365854	0.416667
AT1G67785	223	222	211	99.5516	94.6188	0.711538	1.625
AT1G67860	459	348	347	75.817	75.5991	2	1.2
AT1G67870	1135	1064	1086	93.7445	95.6828	1.28778	1.91724
AT1G67880	1615	1136	961	70.3406	59.5046	0.25	0.375
AT1G67940	1063	666	840	62.6529	79.0216	0.75	0.555556
AT1G67970	1419	1045	1058	73.6434	74.5595	7	7.2
AT1G68000	1005	629	805	62.5871	80.0995	9	0.5
AT1G68010	1629	1439	1384	88.3364	84.9601	0.201811	1.08962
AT1G68050	2113	1638	1804	77.5201	85.3762	0.882353	0.578947
AT1G68070	1313	988	692	75.2475	52.7037	1.4	0.333333
AT1G68100	1674	1412	1328	84.3489	79.3309	1.3125	2.28571
AT1G68185	1027	823	601	80.1363	58.52	2.5	4
AT1G68190	1340	1269	955	94.7015	71.2687	1.8	1
AT1G68300	766	633	699	82.6371	91.2533	0.133333	0.66129
AT1G68490	1337	1080	1232	80.7779	92.1466	3.11111	0.434783
AT1G68520	1596	1555	1571	97.4311	98.4336	4.0625	3.13115
AT1G68560	3106	2906	2755	93.5608	88.6993	0.776316	0.697674
AT1G68570	2031	1812	1860	89.2171	91.5805	2.73832	1.70588
AT1G68600	1875	1394	1499	74.3467	79.9467	1	1.5
AT1G68620	1294	1006	1105	77.7434	85.3941	1.73684	1.28
AT1G68670	1583	1361	1148	85.976	72.5205	0.5	0.5
AT1G68710	3984	3151	2846	79.0914	71.4357	1	1.25
AT1G68720	4215	3518	3483	83.4638	82.6335	0.876923	1.03704
AT1G68740	2724	1446	1552	53.0837	56.975	2	2.5
AT1G68760	698	382	382	54.7278	54.7278	4.5	1.33333
AT1G68790	3643	2811	3076	77.1617	84.4359	1.125	1.16
AT1G68820	1784	1013	1246	56.7825	69.843	1	0.5
AT1G68830	1975	1727	1634	87.443	82.7342	1.52273	3.04545
AT1G68870	654	398	355	60.8563	54.2813	0.142857	0.666667
AT1G68890	5352	4460	4435	83.3333	82.8662	0.22	0.74359
AT1G69010	1302	1001	976	76.8817	74.9616	1.2	1
AT1G69060	2309	1812	1513	78.4755	65.5262	2.45455	0.461538
AT1G69070	2815	1703	1410	60.4973	50.0888	0.75	1.33333
AT1G69160	1375	853	733	62.0364	53.3091	8	3
AT1G69200	2120	1719	1365	81.0849	64.3868	0.16129	0.6
AT1G69270	2014	1189	1443	59.0367	71.6485	3	2.8
AT1G69340	2101	2008	1792	95.5735	85.2927	0.771429	1.36364
AT1G69390	973	831	832	85.406	85.5087	2.16667	1.69231
AT1G69410	768	693	704	90.2344	91.6667	1.625	1.57895
AT1G69460	973	917	766	94.2446	78.7256	1.25926	0.809524
AT1G69490	1100	951	970	86.4545	88.1818	0.818182	0.647059
AT1G69520	789	560	543	70.9759	68.8213	1.33333	2.25
AT1G69640	1286	1088	983	84.6034	76.4386	1.95652	2.09091
AT1G69670	2337	1900	1460	81.3008	62.4733	1.58333	0.75
AT1G69730	2450	2439	2421	99.551	98.8163	2.06977	0.989011
AT1G69750	518	460	459	88.8031	88.61	4.5	3
AT1G69830	2954	2687	2183	90.9614	73.8998	0.863636	0.961538
AT1G69850	2092	1928	1757	92.1606	83.9866	0.707071	2.13636
AT1G69870	2167	2123	2108	97.9695	97.2773	0.790698	0.655172
AT1G69890	1244	926	825	74.4373	66.3183	3.125	1.2
AT1G69935	894	728	697	81.4318	77.9642	1.31818	0.769231
AT1G69960	1281	950	1082	74.1608	84.4653	0.794872	1.92857
AT1G69980	841	527	515	62.6635	61.2366	0.285714	0.3
AT1G70000	1246	917	1071	73.5955	85.9551	4.1875	0.761905
AT1G70060	4437	3700	3220	83.3897	72.5716	3.06667	1.84211
AT1G70070	3564	3443	2661	96.6049	74.6633	1.14667	0.470588
AT1G70160	1966	1857	1821	94.4557	92.6246	0.402985	0.482759
AT1G70200	1883	1781	1547	94.5831	82.1561	2.66667	0.782609
AT1G70310	1297	913	750	70.3932	57.8258	0.15	0.3
AT1G70320	11200	10619	10714	94.8125	95.6607	0.567449	0.531579
AT1G70370	2352	2103	1925	89.4133	81.8452	0.210227	0.392857
AT1G70420	1189	595	674	50.0421	56.6863	1	0.166667
AT1G70520	2194	1780	1868	81.1304	85.1413	0.203704	0.411765
AT1G70530	1941	1488	1530	76.6615	78.8253	2.75	1.46154
AT1G70570	2102	1843	1899	87.6784	90.3425	1.75758	0.689655
AT1G70590	1367	939	969	68.6906	70.8851	3.66667	1.25
AT1G70610	2400	2203	2243	91.7917	93.4583	0.547619	0.510638
AT1G70660	840	787	786	93.6905	93.5714	4.33333	1.33333
AT1G70690	1248	773	722	61.9391	57.8526	3.5	0.8
AT1G70740	1753	1152	1076	65.7159	61.3805	0.466667	0.238095
AT1G70750	2957	1890	1534	63.9161	51.8769	2.33333	1.75
AT1G70770	2317	2149	2095	92.7492	90.4186	0.16087	0.504505
AT1G70780	1136	891	663	78.4331	58.3627	8.28571	4
AT1G70820	2154	1901	1871	88.2544	86.8617	1.24528	0.588235
AT1G70890	818	584	558	71.3936	68.2152	9.3	2.09091
AT1G70900	1191	942	1042	79.0932	87.4895	1.14286	2.125
AT1G70940	2563	2216	1650	86.4612	64.3777	0.671642	0.285714
AT1G70980	1945	1611	1493	82.8278	76.7609	0.7	0.444444
AT1G71010	5205	4586	4301	88.1076	82.6321	0.586957	0.869565
AT1G71030	986	876	756	88.8438	76.6734	0.382353	0.173913
AT1G71040	2079	1821	1828	87.5902	87.9269	0.786408	1.125
AT1G71080	1324	1132	908	85.4985	68.5801	0.205128	0.242424
AT1G71090	1919	1732	1588	90.2553	82.7514	2.46154	2
AT1G71100	1040	896	831	86.1538	79.9038	1.07692	2
AT1G71140	1543	1305	1165	84.5755	75.5023	2.15385	3.25
AT1G71180	1375	978	928	71.1273	67.4909	1.5	2.25
AT1G71220	5065	4765	4785	94.077	94.4719	1.42857	1.16667
AT1G71270	2471	1686	1874	68.2315	75.8397	0.727273	0.714286
AT1G71350	1933	1127	1094	58.3032	56.596	1.28571	2.25
AT1G71410	3271	2595	2052	79.3335	62.7331	1.37778	1.33333
AT1G71480	1017	813	868	79.941	85.3491	3.5	4.4
AT1G71500	1242	1165	1153	93.8003	92.8341	9.54839	1.85
AT1G71695	1318	1214	1220	92.1093	92.5645	0.964286	0.851852
AT1G71710	2281	1870	1327	81.9816	58.1762	0.590909	1.1
AT1G71720	1561	1635	968	104.741	62.0115	1.86957	0.75
AT1G71730	850	811	642	95.4118	75.5294	0.444444	1.2
AT1G71780	926	705	560	76.1339	60.4752	0.857143	0.857143
AT1G71800	1929	1264	1151	65.5262	59.6682	0.428571	0.307692
AT1G71820	2915	2629	2594	90.1887	88.988	1.3617	0.505155
AT1G71840	1601	1393	1321	87.0081	82.5109	1.7619	2.21053
AT1G71880	1937	1703	1775	87.9195	91.6366	0.683544	0.802632
AT1G72010	1709	1401	1456	81.9778	85.196	1	1.13333
AT1G72030	900	872	897	96.8889	99.6667	0.223529	0.627907
AT1G72160	1770	1562	1395	88.2486	78.8136	0.849057	2.52381
AT1G72180	3593	3319	3038	92.3741	84.5533	1.32895	1.45946
AT1G72340	1302	1174	989	90.169	75.9601	1.5	3.33333
AT1G72390	4528	3760	3541	83.0389	78.2023	0.347222	0.333333
AT1G72430	720	679	605	94.3056	84.0278	0.247059	0.3125
AT1G72440	3292	2328	1720	70.7169	52.2479	0.302326	0.758621
AT1G72450	1262	1187	997	94.0571	79.0016	0.357143	0.928571
AT1G72470	2203	1290	1274	58.5565	57.8302	0.166667	0.555556
AT1G72480	1805	1608	1253	89.0859	69.4183	0.714286	2.5
AT1G72520	3042	2583	2437	84.9112	80.1118	2.16667	0.9
AT1G72610	931	870	839	93.4479	90.1182	0.374699	0.337156
AT1G72630	896	484	484	54.0179	54.0179	2	5
AT1G72680	1322	985	1101	74.5083	83.2829	4.8	1.26316
AT1G72700	3929	3759	3624	95.6732	92.2372	0.371134	0.859649
AT1G72710	2086	1913	1879	91.7066	90.0767	0.591837	0.84
AT1G72820	1796	1234	1272	68.7082	70.8241	0.48	0.526316
AT1G72900	1363	1205	1234	88.4079	90.5356	0.5	0.47619
AT1G72920	1070	764	643	71.4019	60.0935	1	0.5
AT1G72940	1525	1053	1075	69.0492	70.4918	0.142857	0.428571
AT1G73030	998	692	799	69.3387	80.0601	1.4	0.441176
AT1G73060	1324	1262	1251	95.3172	94.4864	3.52239	1.16071
AT1G73200	2485	2127	2041	85.5936	82.1328	0.464286	0.703704
AT1G73450	3721	2388	2497	64.1763	67.1056	0.407407	1.63636
AT1G73460	3703	3254	3186	87.8747	86.0383	0.333333	0.72
AT1G73490	1076	984	779	91.4498	72.3978	5.66667	5.5
AT1G73540	946	705	648	74.5243	68.4989	0.882353	0.692308
AT1G73602	1841	1753	1711	95.22	92.9386	0.157895	0.314655
AT1G73655	847	762	740	89.9646	87.3672	1.49367	2.73077
AT1G73660	3940	3266	3095	82.8934	78.5533	1.27273	0.806452
AT1G73670	2165	1676	1705	77.4134	78.7529	1.75	0.888889
AT1G73680	2270	1810	1668	79.7357	73.4802	0.247312	0.9
AT1G73710	2976	2472	2433	83.0645	81.754	0.478261	0.235294
AT1G73720	1802	1269	947	70.4218	52.5527	1	6
AT1G73730	2167	1687	1468	77.8496	67.7434	0.5	0.333333
AT1G73750	1580	1288	841	81.519	53.2278	9.5	3.66667
AT1G73805	1690	1379	1561	81.5976	92.3669	0.313953	0.475
AT1G73810	1452	945	1165	65.0826	80.2342	1.83333	0.909091
AT1G73870	1381	1281	1242	92.7589	89.9348	0.538793	1.13043
AT1G73885	579	538	528	92.9188	91.1917	1.14173	2.13043
AT1G73970	2853	1637	1508	57.3782	52.8566	3	0.444444
AT1G73980	2211	1413	1303	63.9077	58.9326	3.66667	2.14286
AT1G73990	2185	1915	1946	87.643	89.0618	0.294118	0.28
AT1G74050	1037	917	851	88.4282	82.0636	1.64	1.32353
AT1G74060	977	922	873	94.3705	89.3552	6.16	1.76667
AT1G74070	1330	1084	986	81.5038	74.1353	3.75	2.66667
AT1G74090	1285	1226	1078	95.4086	83.8911	0.344186	0.84375
AT1G74100	1350	1049	960	77.7037	71.1111	0.790698	0.75
AT1G74210	1417	1182	1229	83.4157	86.7325	0.307692	0.318182
AT1G74230	1172	1091	1015	93.0887	86.6041	1.25	1.07143
AT1G74250	1893	1807	1792	95.4569	94.6646	0.333333	0.428571
AT1G74260	4536	4326	4009	95.3704	88.3818	0.31982	0.916667
AT1G74270	614	426	394	69.3811	64.1694	2.33333	1.5
AT1G74320	1585	1229	825	77.5394	52.0505	0.9	2.5
AT1G74340	529	349	283	65.9735	53.4972	1	4
AT1G74360	3592	2593	3211	72.1882	89.3931	3.31034	1.13953
AT1G74380	1877	1514	1589	80.6606	84.6564	0.787234	0.888889
AT1G74410	1089	731	615	67.1258	56.4738	2	2
AT1G74450	1772	1103	1027	62.246	57.9571	1	0.5
AT1G74470	1648	1651	1631	100.182	98.9684	0.217161	0.214537
AT1G74520	813	512	452	62.9766	55.5966	0.25	1.5
AT1G74590	1019	583	771	57.213	75.6624	2	0.9
AT1G74640	1313	1192	1113	90.7845	84.7677	0.958333	0.714286
AT1G74680	1861	1086	1098	58.3557	59.0005	1.4	0.8
AT1G74690	2275	1802	1352	79.2088	59.4286	2.375	1
AT1G74720	3757	3287	2509	87.49	66.782	0.337662	0.387097
AT1G74730	891	834	797	93.6027	89.4501	0.342857	0.777778
AT1G74750	2568	1918	1421	74.6885	55.3349	2.42857	1.71429
AT1G74800	2391	1243	1212	51.9866	50.6901	0.785714	1
AT1G74840	1190	968	1005	81.3445	84.4538	4.13333	1.65
AT1G74850	2977	2858	2729	96.0027	91.6695	1.5	1.325
AT1G74860	1598	1070	1148	66.9587	71.8398	4	0.714286
AT1G74880	788	494	465	62.6904	59.0102	1	0.53125
AT1G74920	1843	1633	1419	88.6055	76.994	0.597403	0.767442
AT1G74950	1280	916	822	71.5625	64.2188	5.25	0.4
AT1G74970	958	930	833	97.0772	86.952	1.85185	1.69231
AT1G75010	2493	1519	1297	60.9306	52.0257	0.772727	1.4
AT1G75040	980	965	923	98.4694	94.1837	6.94737	2.4697
AT1G75100	2279	2082	1967	91.3559	86.3098	0.628205	2
AT1G75130	1660	1164	1216	70.1205	73.253	0.666667	1.44444
AT1G75140	2227	1400	1270	62.8648	57.0274	0.857143	1
AT1G75200	2279	1420	1450	62.308	63.6244	0.2	0.37037
AT1G75210	2274	2188	1733	96.2181	76.2093	1.55556	2.88889
AT1G75280	1267	1124	1124	88.7135	88.7135	8.18182	1.8125
AT1G75310	4347	3613	2296	83.1148	52.818	1.47368	1.09091
AT1G75330	1355	1207	1003	89.0775	74.0221	0.581395	1.42857
AT1G75350	672	602	532	89.5833	79.1667	0.275862	0.25
AT1G75400	1948	1548	1548	79.4661	79.4661	0.35	0.388889
AT1G75500	1817	1479	1329	81.3979	73.1425	0.337143	0.30303
AT1G75510	1091	875	843	80.2016	77.2686	1.02128	0.83871
AT1G75630	779	662	660	84.9807	84.724	0.363636	0.140625
AT1G75660	3497	3303	3133	94.4524	89.5911	1.37805	1.21429
AT1G75690	743	629	445	84.6568	59.8923	0.152778	0.454545
AT1G75800	1507	1371	990	90.9754	65.6934	0.446809	9
AT1G75820	3431	2823	2831	82.2792	82.5124	0.442211	1.72973
AT1G75840	1273	1082	931	84.9961	73.1343	1.11765	0.6
AT1G75850	2712	1643	1454	60.5826	53.6136	0.583333	0.545455
AT1G75900	1409	1145	920	81.2633	65.2945	4.66667	7
AT1G75950	895	761	739	85.0279	82.5698	0.208333	0.615385
AT1G75990	1652	1428	1102	86.4407	66.707	0.75	0.578947
AT1G76010	1636	1391	1370	85.0244	83.7408	0.409091	2.52
AT1G76030	1900	1836	1766	96.6316	92.9474	3.35714	1.25
AT1G76060	751	602	628	80.1598	83.6218	0.6	1
AT1G76080	1257	1086	1046	86.3962	83.214	1.04803	1
AT1G76090	1373	1298	788	94.5375	57.3926	1.22222	2
AT1G76110	1383	965	1002	69.7758	72.4512	0.583333	1
AT1G76130	1491	1450	1379	97.2502	92.4883	0.478261	0.75
AT1G76150	1489	998	1150	67.0248	77.233	1.8	1
AT1G76160	2008	1855	1714	92.3805	85.3586	2.21538	1.125
AT1G76180	1018	877	719	86.1493	70.6287	3.06977	1.77778
AT1G76350	2908	1914	2086	65.8184	71.7331	0.555556	1.54545
AT1G76400	2042	1338	1386	65.524	67.8746	1.2	1.45455
AT1G76450	946	800	847	84.5666	89.5349	0.176471	0.555556
AT1G76490	2557	2288	2179	89.4799	85.2171	0.224066	0.956522
AT1G76560	601	422	312	70.2163	51.9135	0.285714	0.333333
AT1G76570	1055	783	883	74.218	83.6967	0.6	2.66667
AT1G76580	3686	2396	2698	65.0027	73.1959	1.35294	4.83333
AT1G76670	1666	1446	954	86.7947	57.2629	2.08333	1.5
AT1G76690	1339	954	948	71.2472	70.7991	8	1.25
AT1G76700	1634	980	870	59.9755	53.2436	1	0.181818
AT1G76810	4395	4110	3869	93.5154	88.0319	1.21094	0.825
AT1G76850	3552	3361	3140	94.6227	88.4009	2.22857	1.29167
AT1G76880	2200	1919	1743	87.2273	79.2273	0.62963	0.882353
AT1G76890	1969	1717	1756	87.2016	89.1823	4.4375	5
AT1G76920	1615	1113	904	68.9164	55.9752	4.85714	1.2
AT1G76955	608	331	334	54.4408	54.9342	1.66667	1
AT1G76970	1761	1011	1105	57.4106	62.7484	0.192308	0.333333
AT1G77000	1416	914	798	64.548	56.3559	1.4	0.8
AT1G77030	2676	1823	1517	68.1241	56.6891	0.28	0.9
AT1G77060	1199	973	679	81.151	56.6305	0.947368	0.777778
AT1G77130	2146	1714	1473	79.8695	68.6393	0.4375	0.4
AT1G77140	2150	1857	1620	86.3721	75.3488	2	2.5
AT1G77220	2025	1620	1261	80	62.2716	1.90476	1.33333
AT1G77260	2415	1967	1334	81.4493	55.2381	1.32	0.75
AT1G77370	620	532	554	85.8065	89.3548	3.25	0.833333
AT1G77420	1565	1224	1022	78.2109	65.3035	2.75	1.83333
AT1G77490	1596	1432	1402	89.7243	87.8446	0.522388	1.09091
AT1G77500	3158	2657	2456	84.1355	77.7707	4	1.72727
AT1G77510	1798	1660	1698	92.3248	94.4383	0.977273	1.26866
AT1G77610	1577	1154	1115	73.1769	70.7039	1.1	2.42857
AT1G77670	1539	1232	1064	80.052	69.1358	0.230769	0.285714
AT1G77680	3846	2657	2882	69.0848	74.935	1.25	1.25
AT1G77740	2698	2456	2478	91.0304	91.8458	7	2.48485
AT1G77760	3034	2968	3001	97.8247	98.9123	1.38667	0.636364
AT1G77800	5103	4703	4600	92.1615	90.1431	2.14	1.5
AT1G77850	2076	1431	1280	68.9306	61.657	0.846154	2.33333
AT1G77990	2203	1425	1681	64.6845	76.305	3.8	1.63158
AT1G78020	847	747	709	88.1936	83.7072	2.35714	4.09091
AT1G78100	1318	1088	1132	82.5493	85.8877	6.33333	0.9
AT1G78140	1314	832	776	63.3181	59.0563	0.210526	0.5
AT1G78180	1378	937	820	67.9971	59.5065	3	0.8
AT1G78190	375	200	348	53.3333	92.8	2	1.33333
AT1G78230	2295	2064	2008	89.9346	87.4946	1.26923	0.76
AT1G78270	1792	1420	921	79.2411	51.3951	1.41667	0.571429
AT1G78280	3355	2237	2232	66.6766	66.5276	0.923077	1.35714
AT1G78370	899	909	871	101.112	96.8854	0.946844	1.71739
AT1G78380	993	914	909	92.0443	91.5408	0.981233	1.05814
AT1G78420	1923	1431	1426	74.415	74.155	1.75	5
AT1G78570	2463	2289	2318	92.9354	94.1129	1.25926	1.7027
AT1G78600	1280	984	1018	76.875	79.5312	1.5	1.25
AT1G78670	1347	901	889	66.8894	65.9985	2.5	2
AT1G78680	1429	1118	931	78.2365	65.1505	1.77778	1.33333
AT1G78800	1460	1066	964	73.0137	66.0274	0.625	0.470588
AT1G78830	1598	1437	1495	89.9249	93.5544	0.254237	0.375
AT1G78995	866	693	762	80.0231	87.9908	7.33333	2.14286
AT1G79000	6087	5227	5125	85.8715	84.1958	1.10784	1.2549
AT1G79010	1023	808	616	78.9834	60.2151	1	0.888889
AT1G79080	1973	1431	1235	72.5291	62.595	5.11111	0.818182
AT1G79160	966	691	546	71.5321	56.5217	1.57143	1.33333
AT1G79280	6451	4998	4706	77.4764	72.9499	0.408759	0.613636
AT1G79340	1605	1417	1416	88.2866	88.2243	1.21429	1.77273
AT1G79350	4295	3005	2224	69.9651	51.7811	1.28571	1.90909
AT1G79380	1820	1499	1491	82.3626	81.9231	0.357143	0.388889
AT1G79390	666	548	470	82.2823	70.5706	4.33333	1.83333
AT1G79440	2039	1210	1074	59.3428	52.6729	5	0.75
AT1G79540	2594	1685	1309	64.9576	50.4626	0.5	0.6
AT1G79560	3486	3263	2443	93.603	70.0803	2.84848	1.91667
AT1G79570	4311	3518	3317	81.6052	76.9427	1.92593	1.5
AT1G79600	2490	2326	2270	93.4137	91.1647	0.636364	0.692308
AT1G79690	2720	2101	2157	77.2426	79.3015	1.92857	1.66667
AT1G79720	1681	1408	1144	83.7597	68.0547	2.375	3.66667
AT1G79740	2041	1800	1167	88.1921	57.1779	0.538462	1
AT1G79750	2484	1882	1830	75.7649	73.6715	1.97826	1.66667
AT1G79870	1166	1103	1038	94.5969	89.0223	0.625	0.444444
AT1G79950	3123	2141	1744	68.5559	55.8437	3.25	1.63636
AT1G80010	2342	2176	1686	92.912	71.9898	0.438596	0.466667
AT1G80020	3427	2913	2611	85.0015	76.1891	0.433962	0.615385
AT1G80070	7386	7188	7248	97.3193	98.1316	1.4466	1.18447
AT1G80120	948	752	590	79.3249	62.2363	3.5	0.75
AT1G80230	946	697	691	73.6786	73.0444	4.25	3.22222
AT1G80260	3297	2613	1922	79.2539	58.2954	0.709677	1.18182
AT1G80300	2212	2080	1835	94.0325	82.9566	1.06061	1.40909
AT1G80360	1492	1286	1123	86.193	75.2681	5.9375	7.5
AT1G80400	1747	1213	1062	69.4333	60.7899	0.5	0.4
AT1G80410	3321	2521	2201	75.9109	66.2752	1.2623	0.967742
AT1G80440	1465	994	1049	67.8498	71.6041	3.5	0.875
AT1G80500	898	649	669	72.2717	74.4989	0.384615	0.777778
AT1G80510	1945	1451	1443	74.6015	74.1902	1.16667	1.42857
AT1G80530	2035	1643	1233	80.7371	60.5897	0.333333	0.9
AT1G80550	1759	1208	923	68.6754	52.473	1.75	1.6
AT1G80560	1460	1318	997	90.274	68.2877	1.05263	2
AT1G80600	1590	1490	1571	93.7107	98.805	0.907285	1.04444
AT1G80620	1522	1348	909	88.5677	59.724	2.42857	0.571429
AT1G80750	975	910	779	93.3333	79.8974	0.368421	0.357143
AT1G80770	1685	1451	1417	86.1128	84.095	0.545455	0.866667
AT1G80790	2314	2160	1668	93.3449	72.083	1.30303	0.857143
AT1G80830	1838	1155	1284	62.84	69.8585	1.6	1.33333
AT1G80840	1195	988	1103	82.6778	92.3013	1.16667	0.875
AT1G80870	2251	1983	1304	88.0942	57.9298	0.842105	1.4
AT1G80900	1614	1044	863	64.684	53.4696	1.16667	0.5
AT1G80910	1927	1611	1585	83.6015	82.2522	1.11111	1.7
AT1G80920	852	772	597	90.6103	70.0704	8.77778	1.13208
AT1G80930	3256	2566	2416	78.8084	74.2015	0.191176	0.340909
AT1G80950	1484	1013	1131	68.2615	76.2129	0.171429	0.866667
AT2G01021	102	111	109	108.824	106.863	0.878015	1.04049
AT2G01023	120	89	75	74.1667	62.5	2.5	2
AT2G01110	1690	1233	1351	72.9586	79.9408	1.25253	0.725
AT2G01140	1535	1494	1392	97.329	90.684	1.67532	2.14286
AT2G01270	2033	1768	1763	86.9651	86.7191	0.1875	0.216216
AT2G01290	1464	1287	1109	87.9098	75.7514	0.4	0.4
AT2G01400	1022	726	604	71.0372	59.0998	9.5	1.71429
AT2G01410	1368	1120	1127	81.8713	82.383	5	2.5
AT2G01440	3363	2245	1946	66.7559	57.865	3.875	3.83333
AT2G01460	2889	1911	1577	66.1475	54.5864	1.25	0.583333
AT2G01470	1464	949	922	64.8224	62.9781	0.55	1.11111
AT2G01570	2302	2158	2167	93.7446	94.1355	6.68627	2.14706
AT2G01590	989	799	609	80.7887	61.5774	9.33333	6.66667
AT2G01600	2127	1679	1831	78.9375	86.0837	0.607143	3.85714
AT2G01650	1655	1317	1287	79.577	77.7644	0.235294	1.17391
AT2G01670	1211	1138	1120	93.9719	92.4855	1.11765	0.645833
AT2G01680	2043	1907	1856	93.3431	90.8468	0.174603	1.41176
AT2G01710	1268	934	766	73.6593	60.4101	0.857143	0.5
AT2G01720	1719	1385	1346	80.5701	78.3013	0.7	1.75
AT2G01735	1306	1020	749	78.1011	57.3507	0.666667	0.5
AT2G01755	588	468	317	79.5918	53.9116	2	3
AT2G01820	3065	2454	2206	80.0653	71.9739	0.837209	0.596774
AT2G01850	1383	1219	1170	88.1417	84.5987	7.8	2.76471
AT2G01870	936	529	470	56.5171	50.2137	1	1.5
AT2G01970	2171	1800	1532	82.9111	70.5666	1.71875	0.789474
AT2G01980	3682	2290	2280	62.1945	61.9229	0.545455	0.73913
AT2G02010	1791	1131	949	63.1491	52.9872	0.857143	0.636364
AT2G02040	2002	1789	1834	89.3606	91.6084	0.636364	0.653846
AT2G02070	2116	1751	1450	82.7505	68.5255	2.07692	2.33333
AT2G02090	2617	1777	2049	67.9022	78.2958	8.16667	1.42857
AT2G02100	504	391	300	77.5794	59.5238	1	4
AT2G02130	533	476	441	89.3058	82.7392	0.442623	1.2
AT2G02160	2521	2240	2256	88.8536	89.4883	2.46667	2.21053
AT2G02180	1296	1182	1122	91.2037	86.5741	0.6	0.875
AT2G02220	3147	2200	2208	69.9078	70.1621	0.75	0.5
AT2G02360	1144	926	737	80.9441	64.4231	0.147059	0.137931
AT2G02400	1260	777	685	61.6667	54.3651	4.33333	0.5
AT2G02410	1286	1022	940	79.4712	73.0949	1.4	0.571429
AT2G02470	1322	873	743	66.0363	56.2027	0.5	1
AT2G02760	934	836	847	89.5075	90.6852	9.66667	0.666667
AT2G02790	2067	1504	1161	72.7625	56.1684	2	2.16667
AT2G02810	1259	879	1105	69.8173	87.7681	0.166667	1.42857
AT2G02950	1592	1098	1147	68.9698	72.0477	1.33333	0.571429
AT2G02970	2275	1538	1183	67.6044	52	4.3	1.5
AT2G03120	1425	1253	1281	87.9298	89.8947	0.909091	0.875
AT2G03140	5992	5144	4730	85.8478	78.9386	0.232	0.380952
AT2G03150	4398	3949	3666	89.7908	83.3561	1.83784	1.39286
AT2G03310	845	588	446	69.5858	52.7811	0.461538	0.9
AT2G03340	2128	1630	1398	76.5977	65.6955	0.72549	0.9
AT2G03390	1366	1000	1043	73.2064	76.3543	1.61905	1
AT2G03440	914	814	639	89.0591	69.9125	1.125	0.153846
AT2G03510	1397	1139	1307	81.5319	93.5576	3.125	2
AT2G03550	1048	911	861	86.9275	82.1565	2.20833	1.68421
AT2G03690	1063	758	569	71.3076	53.5278	8.66667	3
AT2G03750	1255	1128	1004	89.8805	80	0.428571	1.3
AT2G03800	1262	764	803	60.5388	63.6292	0.333333	0.666667
AT2G03820	1841	1690	1660	91.7979	90.1684	1.73333	1.15625
AT2G04066	516	297	346	57.5581	67.0543	1	0.5
AT2G04080	1663	1119	975	67.288	58.629	0.125	0.115385
AT2G04280	2022	1876	1733	92.7794	85.7072	1.8	0.928571
AT2G04305	1821	1270	1054	69.7419	57.8803	0.181818	0.909091
AT2G04340	984	626	682	63.6179	69.3089	0.75	2
AT2G04360	1241	1107	641	89.2023	51.6519	2.84615	0.4
AT2G04390	684	587	582	85.8187	85.0877	1.93333	1.28571
AT2G04400	1428	1268	1302	88.7955	91.1765	1.59375	0.8
AT2G04410	615	546	552	88.7805	89.7561	1.88889	1.2
AT2G04430	1019	640	584	62.8067	57.3111	0.222222	0.4
AT2G04530	1294	1114	924	86.0896	71.4065	1.375	0.625
AT2G04740	1879	964	1164	51.3039	61.9478	0.714286	1.75
AT2G04795	523	418	409	79.9235	78.2027	2	0.555556
AT2G04842	1953	1923	1842	98.4639	94.3164	1.23009	2.95
AT2G04865	2004	1990	1474	99.3014	73.5529	1	1.33333
AT2G04890	1863	1207	1196	64.788	64.1975	0.307692	0.666667
AT2G05070	1063	966	947	90.8749	89.0875	0.562338	0.802632
AT2G05100	1101	855	801	77.6567	72.752	3.49171	3.9322
AT2G05170	3334	3033	3065	90.9718	91.9316	0.432692	1.07317
AT2G05250	2839	2026	1661	71.3632	58.5065	4.33333	1.6
AT2G05310	564	531	499	94.1489	88.4752	1.43103	2
AT2G05320	1449	1329	1368	91.7184	94.4099	0.346154	0.52381
AT2G05620	768	624	599	81.25	77.9948	0.25	0.540541
AT2G05710	3493	3229	3329	92.442	95.3049	3.4375	3.51111
AT2G05920	2603	2529	2198	97.1571	84.441	0.647059	1.28125
AT2G05940	1702	1226	1289	72.0329	75.7344	0.233766	0.435897
AT2G06010	1031	607	589	58.8749	57.129	8	1.5
AT2G06025	1431	1221	1166	85.3249	81.4815	1.14286	0.222222
AT2G06210	3579	2447	1927	68.3711	53.8419	0.567568	0.818182
AT2G06520	630	633	584	100.476	92.6984	3.75	5.73333
AT2G06850	1214	1089	911	89.7035	75.0412	9.375	2.66667
AT2G06990	3352	2738	2480	81.6826	73.9857	2.63636	2
AT2G07050	2839	2353	2370	82.8813	83.4801	0.72043	0.488372
AT2G07180	1736	1553	1414	89.4585	81.4516	2.8	4.57143
AT2G07360	3992	3254	2768	81.513	69.3387	0.724138	1.3
AT2G07669	330	379	272	114.848	82.4242	1.75	1.5
AT2G07675	378	370	441	97.8836	116.667	3.97183	3.04054
AT2G07676	357	346	335	96.9188	93.8375	0.166667	0.1875
AT2G07678	738	473	522	64.0921	70.7317	0.166667	0.25
AT2G07680	3756	2845	2508	75.7455	66.7732	2.30769	1.52941
AT2G07681	771	682	598	88.4565	77.5616	0.101266	0.2
AT2G07686	2013	1399	1057	69.4983	52.5087	1.3	1.46154
AT2G07687	998	1071	1065	107.315	106.713	2.96515	1.54618
AT2G07689	645	639	646	99.0698	100.155	3.10294	1.51282
AT2G07695	876	920	740	105.023	84.4749	0.169892	0.213115
AT2G07696	832	811	828	97.476	99.5192	2.88889	2.36364
AT2G07698	2433	2369	2374	97.3695	97.575	0.888694	5.93307
AT2G07708	1183	1169	1126	98.8166	95.1817	6.77108	2.47727
AT2G07715	924	929	994	100.541	107.576	1.33746	1.064
AT2G07722	420	315	349	75	83.0952	0.125	1
AT2G07724	324	177	188	54.6296	58.0247	0.5	0.333333
AT2G07725	746	740	734	99.1957	98.3914	0.567568	1.0625
AT2G07727	1467	1438	1440	98.0232	98.1595	3.18182	3.53571
AT2G07732	607	649	637	106.919	104.942	0.256478	0.675232
AT2G07734	1388	1380	1386	99.4236	99.8559	1.22727	0.612903
AT2G07739	600	543	554	90.5	92.3333	0.13913	0.209607
AT2G07741	1158	1150	1149	99.3092	99.2228	1.785	1.45255
AT2G07749	2124	1701	1338	80.0847	62.9944	1.72727	0.875
AT2G07751	357	356	352	99.7199	98.5994	1.35417	1.47917
AT2G07767	370	323	359	87.2973	97.027	1	0.583333
AT2G07769	353	302	250	85.5524	70.8215	2	1
AT2G07771	771	752	652	97.5357	84.5655	6	2.83333
AT2G07773	822	790	746	96.1071	90.7543	8.22222	2.13333
AT2G07774	514	401	304	78.0156	59.144	5	9
AT2G07779	594	532	482	89.5623	81.1448	1.6	0.8
AT2G07787	1254	978	635	77.9904	50.638	0.882353	0.333333
AT2G07815	303	236	158	77.8878	52.1452	0.111111	0.333333
AT2G07825	198	140	141	70.7071	71.2121	4	4
AT2G07830	123	118	75	95.935	60.9756	1.33333	2
AT2G07835	159	150	143	94.3396	89.9371	0.736842	0.625
AT2G10950	1196	658	715	55.0167	59.7826	0.2	0.4
AT2G11271	126	107	101	84.9206	80.1587	2	1.33333
AT2G11773	108	103	75	95.3704	69.4444	1	1
AT2G12461	135	110	101	81.4815	74.8148	0.666667	0.5
AT2G12905	219	220	213	100.457	97.2603	1.31818	1.1875
AT2G13370	5938	4420	4740	74.4358	79.8249	1.13235	1.45833
AT2G13540	2860	2474	2004	86.5035	70.0699	4.5	1.3125
AT2G13560	2214	1994	2054	90.0632	92.7733	3.48276	1.77358
AT2G13790	2234	1820	1929	81.4682	86.3474	2.66667	1.44444
AT2G13810	1535	1090	1368	71.0098	89.1205	2.6	1.0625
AT2G14610	760	635	710	83.5526	93.4211	0.247059	0.201853
AT2G14750	1192	988	1025	82.8859	85.9899	0.717949	0.416667
AT2G14850	1349	856	678	63.4544	50.2595	1.5	4
AT2G14880	877	689	609	78.5633	69.4413	0.732143	1.07692
AT2G15020	1919	1617	1797	84.2626	93.6425	3.725	0.622951
AT2G15090	1692	1329	1266	78.5461	74.8227	2.41667	1.1
AT2G15230	1458	1280	820	87.7915	56.2414	2.66667	3.5
AT2G15290	1129	913	735	80.868	65.1019	3.75	1.6
AT2G15430	1248	972	692	77.8846	55.4487	0.75	1
AT2G15480	1772	1271	1288	71.7269	72.6862	0.178571	0.529412
AT2G15560	2091	1344	1247	64.2755	59.6365	0.307692	0.454545
AT2G15580	764	651	665	85.2094	87.0419	9.81818	2.71429
AT2G15620	2110	2031	1990	96.2559	94.3128	1.2408	0.688889
AT2G15690	2783	1988	1938	71.4337	69.6371	0.3	0.384615
AT2G15695	1675	1219	1224	72.7761	73.0746	0.965517	0.384615
AT2G15820	2744	2201	1763	80.2114	64.2493	0.523077	0.875
AT2G15900	3199	2754	2323	86.0894	72.6164	0.515152	1.38889
AT2G15960	380	263	194	69.2105	51.0526	5.5	2
AT2G16280	1954	1797	1748	91.9652	89.4575	0.190184	0.64
AT2G16380	2055	1391	1656	67.6886	80.5839	5.33333	3.66667
AT2G16400	2156	1696	1560	78.6642	72.3562	0.116883	0.4375
AT2G16405	1797	1235	1223	68.7257	68.0579	0.25	0.916667
AT2G16485	5647	5162	4525	91.4114	80.131	2.94737	3.07143
AT2G16510	954	813	845	85.2201	88.5744	0.428571	0.875
AT2G16640	3975	3671	3430	92.3522	86.2893	0.489209	0.87037
AT2G16660	1898	1752	1730	92.3077	91.1486	0.428571	0.473684
AT2G16800	1384	1255	864	90.6792	62.4277	0.75	0.222222
AT2G16860	1255	977	949	77.8486	75.6175	5	3.5
AT2G16880	2388	1778	1214	74.4556	50.8375	1.77778	0.714286
AT2G16920	3665	3113	2797	84.9386	76.3165	3.71429	1.46667
AT2G16940	2131	1721	1618	80.7602	75.9268	2.51282	4.05556
AT2G17020	2244	1564	1372	69.697	61.1408	0.941176	1.375
AT2G17110	2684	2068	1752	77.0492	65.2757	0.657143	1.11765
AT2G17120	1333	1121	923	84.096	69.2423	0.555556	1.2
AT2G17190	2181	1808	1819	82.8978	83.4021	2	1.4
AT2G17200	2058	1789	1879	86.9291	91.3022	2.09677	1.93333
AT2G17240	681	585	609	85.9031	89.4273	1.08333	0.538462
AT2G17265	1168	1062	1001	90.9247	85.7021	0.442308	1.125
AT2G17290	2332	1978	2008	84.8199	86.1063	0.5625	1.07407
AT2G17340	1352	850	734	62.8698	54.2899	1.5	0.478261
AT2G17350	745	651	631	87.3826	84.698	1.4375	1.5
AT2G17360	1079	1007	968	93.3272	89.7127	1.28571	1
AT2G17380	764	648	657	84.8168	85.9948	2	2
AT2G17390	1447	1217	1161	84.105	80.235	1.5625	0.923077
AT2G17410	2819	2656	2630	94.2178	93.2955	1	1.85714
AT2G17450	827	772	512	93.3495	61.9105	3	7
AT2G17510	3080	1812	1919	58.8312	62.3052	0.481481	0.764706
AT2G17520	2915	2698	2597	92.5557	89.0909	3.66667	2.47059
AT2G17710	911	558	565	61.2514	62.0198	3	4
AT2G17720	1339	1058	1074	79.0142	80.2091	1.375	0.666667
AT2G17760	1911	1557	1591	81.4757	83.2548	0.466667	0.833333
AT2G17790	2743	2539	2318	92.5629	84.506	0.333333	0.703704
AT2G17820	4040	3642	3464	90.1485	85.7426	1.07353	1.30952
AT2G17870	1256	1095	975	87.1815	77.6274	7.2	4
AT2G17930	11555	9522	8564	82.4059	74.1151	0.383784	0.777778
AT2G17972	746	514	379	68.9008	50.8043	6	2
AT2G17980	2263	1995	2060	88.1573	91.0296	3	0.771429
AT2G17990	1424	1120	1150	78.6517	80.7584	0.25	0.5
AT2G18020	970	903	897	93.0928	92.4742	0.350404	0.287879
AT2G18040	875	762	769	87.0857	87.8857	0.146341	0.2
AT2G18090	3111	2550	2239	81.9672	71.9704	1.5	0.789474
AT2G18110	978	888	863	90.7975	88.2413	1.71429	3
AT2G18160	1231	700	817	56.8643	66.3688	4	2.5
AT2G18162	1231	818	644	66.45	52.3152	6	1.33333
AT2G18220	2340	1961	1201	83.8034	51.3248	0.724138	2.28571
AT2G18290	1028	536	551	52.1401	53.5992	3.375	1.6
AT2G18390	879	655	490	74.5165	55.7452	0.153846	2
AT2G18560	1769	1413	1219	79.8756	68.909	1.25	1.2
AT2G18700	2800	2756	2663	98.4286	95.1071	0.962264	0.8125
AT2G18710	1836	1710	1200	93.1373	65.3595	0.357143	0.818182
AT2G18730	1849	1736	1625	93.8886	87.8853	2.46875	4
AT2G18790	3996	3648	3729	91.2913	93.3183	0.496296	1
AT2G18840	1179	755	856	64.0373	72.6039	2	0.8
AT2G18940	2666	2189	2116	82.108	79.3698	0.582278	0.516129
AT2G18950	1747	1247	1473	71.3795	84.316	0.6	2.44444
AT2G18960	3431	3209	3208	93.5296	93.5004	1.65812	1.21122
AT2G19080	1234	628	794	50.8914	64.3436	8	1.8
AT2G19110	3812	3209	2675	84.1815	70.1731	0.238095	0.652174
AT2G19130	2594	2183	2151	84.1557	82.9221	3.71429	2
AT2G19160	2064	1497	1764	72.5291	85.4651	1	1.66667
AT2G19180	864	566	516	65.5093	59.7222	0.333333	1.5
AT2G19260	2422	1389	1528	57.3493	63.0884	0.545455	1.71429
AT2G19270	1257	1002	851	79.7136	67.7009	0.238095	0.4375
AT2G19310	613	541	524	88.2545	85.4812	0.363636	1.18182
AT2G19390	4414	2384	2251	54.01	50.9968	0.181818	0.9375
AT2G19520	1884	1788	1668	94.9045	88.535	1.07463	1.21739
AT2G19540	1644	1506	1269	91.6058	77.1898	1.1875	0.5
AT2G19650	2349	2027	1919	86.292	81.6943	1.03922	0.428571
AT2G19710	3287	2422	2412	73.6842	73.38	0.434783	0.8
AT2G19740	597	571	514	95.6449	86.0972	3.33333	3.25
AT2G19750	604	454	459	75.1656	75.9934	0.324324	0.5
AT2G19790	641	537	457	83.7754	71.2949	0.18	1.33333
AT2G19830	1071	755	688	70.4949	64.239	0.666667	0.25
AT2G19870	2070	1445	1518	69.8068	73.3333	4	2.25
AT2G19880	2140	1928	1636	90.0935	76.4486	0.25	0.666667
AT2G20020	2285	2083	1852	91.1597	81.0503	1.33333	0.666667
AT2G20140	1615	1464	1288	90.6502	79.7523	5.35294	2.42857
AT2G20142	1032	885	871	85.7558	84.3992	2	5.6
AT2G20190	4791	4076	3844	85.0762	80.2338	2.45	1.4
AT2G20230	1388	952	1033	68.5879	74.4236	0.333333	0.714286
AT2G20260	607	599	549	98.682	90.4448	3.8	2.46154
AT2G20270	896	748	513	83.4821	57.2545	2.4	3.4
AT2G20280	1259	1143	1100	90.7863	87.3709	0.127451	0.736842
AT2G20330	2244	1910	1179	85.1159	52.5401	2.69565	2.57143
AT2G20340	1824	1459	1318	79.989	72.2588	0.192308	0.352941
AT2G20360	1666	1479	1506	88.7755	90.3962	0.202703	0.62963
AT2G20370	2416	1952	1209	80.7947	50.0414	8.28571	2.5
AT2G20420	1649	1456	1485	88.2959	90.0546	1.80282	1.57895
AT2G20450	648	568	455	87.6543	70.216	0.2	0.5
AT2G20560	1432	865	870	60.405	60.7542	3	1.14286
AT2G20570	1625	1555	1624	95.6923	99.9385	4.22222	1.5814
AT2G20580	3065	2911	2989	94.9755	97.5204	0.515723	0.677215
AT2G20670	1250	1088	918	87.04	73.44	0.277027	0.45
AT2G20690	1206	1100	1086	91.2106	90.0498	0.46875	0.470588
AT2G20725	1518	1134	1220	74.7036	80.3689	9.64706	1.84615
AT2G20760	1669	1432	1484	85.7999	88.9155	3.375	1.3913
AT2G20780	2078	1546	1551	74.3985	74.6391	2.72727	1.28571
AT2G20810	1915	1411	1407	73.6815	73.4726	1.08333	0.588235
AT2G20860	1425	1282	1330	89.9649	93.3333	0.478261	0.578947
AT2G20890	1251	1204	1195	96.243	95.5236	0.198276	0.631579
AT2G20920	1049	1008	1019	96.0915	97.1401	1	0.461538
AT2G20960	2533	2371	2254	93.6044	88.9854	2	2.17647
AT2G20990	2159	1991	1999	92.2186	92.5892	1.52727	1.02632
AT2G21060	858	779	757	90.7925	88.2284	9.25	4.33333
AT2G21120	1689	1280	1184	75.7845	70.1007	0.382979	0.588235
AT2G21130	835	656	533	78.5629	63.8323	3.33333	5
AT2G21150	1245	1150	1128	92.3695	90.6024	1.26316	1
AT2G21185	612	489	324	79.902	52.9412	0.333333	1
AT2G21190	1123	1008	1054	89.7596	93.8557	0.772727	0.5
AT2G21320	949	722	540	76.0801	56.902	0.8	0.166667
AT2G21380	3614	3249	2574	89.9004	71.223	0.958904	1
AT2G21390	4190	4071	4152	97.1599	99.0931	1.45082	0.941176
AT2G21410	2860	2542	2457	88.8811	85.9091	0.433333	0.361111
AT2G21440	3265	2182	1848	66.83	56.6003	3.54839	1.42857
AT2G21530	804	691	627	85.9453	77.9851	0.230769	0.470588
AT2G21560	1241	809	1115	65.1894	89.8469	1.5	1.33333
AT2G21600	988	867	803	87.753	81.2753	0.875	0.7
AT2G21640	536	303	335	56.5299	62.5	0.333333	0.142857
AT2G21790	2972	2768	2090	93.1359	70.323	1.78571	1.125
AT2G21950	1472	1416	1281	96.1957	87.0245	0.631579	1.28571
AT2G21960	1280	1238	1072	96.7188	83.75	0.625	1.90909
AT2G22010	4368	3609	3313	82.6236	75.8471	1.13043	0.615385
AT2G22120	1432	969	870	67.6676	60.7542	0.166667	0.5
AT2G22125	6941	6429	6047	92.6235	87.12	0.912791	1.38636
AT2G22330	1883	1624	1764	86.2454	93.6803	1.11321	1.37931
AT2G22360	1615	1482	1472	91.7647	91.1455	0.717949	2.66667
AT2G22400	2678	2136	1417	79.761	52.9126	1.71429	0.5
AT2G22420	1163	648	597	55.718	51.3328	0.777778	0.5
AT2G22430	1529	1428	1405	93.3944	91.8901	0.188679	0.557377
AT2G22450	1761	1239	1008	70.3578	57.2402	0.833333	1
AT2G22480	1889	1488	1544	78.7718	81.7364	1	1.25
AT2G22490	1708	1132	954	66.2763	55.8548	0.8125	0.6
AT2G22640	753	546	492	72.51	65.3386	3	1.66667
AT2G22780	1876	1438	1209	76.6525	64.4456	3	1.16667
AT2G22795	2530	2197	1779	86.8379	70.3162	0.185714	0.545455
AT2G22910	2075	1848	1184	89.0602	57.0602	0.326087	0.5
AT2G23067	144	74	74	51.3889	51.3889	2	3
AT2G23090	580	476	457	82.069	78.7931	0.238636	0.573529
AT2G23140	2551	2189	1837	85.8095	72.011	0.3	0.4
AT2G23200	2633	2344	2479	89.0239	94.1512	0.546875	0.492063
AT2G23340	878	508	671	57.8588	76.4237	0.25	0.75
AT2G23350	2373	2297	2223	96.7973	93.6789	3.41667	1.16129
AT2G23390	1753	1247	1112	71.1352	63.4341	0.280702	0.590909
AT2G23420	2075	1842	1871	88.7711	90.1687	0.758621	0.697674
AT2G23460	3065	2770	2686	90.3752	87.6346	1.125	0.782609
AT2G23520	2953	2331	1659	78.9367	56.1802	1.375	0.6
AT2G23600	950	859	857	90.4211	90.2105	0.511811	0.785714
AT2G23610	1152	836	932	72.5694	80.9028	2.075	1.68966
AT2G23670	709	594	647	83.78	91.2553	3.1	1.64286
AT2G23770	1839	1649	1163	89.6683	63.2409	0.9375	4.2
AT2G23780	1101	894	823	81.1989	74.7502	0.3	0.272727
AT2G23790	1401	816	1119	58.2441	79.8715	1.11111	0.928571
AT2G23810	1285	1104	1122	85.9144	87.3152	0.61194	0.578947
AT2G23840	1087	844	885	77.6449	81.4167	1.5	1.07692
AT2G23940	989	650	595	65.723	60.1618	0.142857	0.166667
AT2G23980	2516	1901	1584	75.5564	62.9571	0.78125	0.529412
AT2G24020	800	496	517	62	64.625	0.666667	1.16667
AT2G24060	1180	996	928	84.4068	78.6441	0.322581	0.4
AT2G24090	710	656	618	92.3944	87.0423	0.218391	0.3
AT2G24150	1243	1024	819	82.3813	65.889	0.385714	0.285714
AT2G24180	1701	1518	1555	89.2416	91.4168	2.38235	2.35294
AT2G24240	1681	1075	1132	63.95	67.3409	2.33333	3
AT2G24330	1666	1264	1128	75.8703	67.7071	0.708333	0.666667
AT2G24360	1882	1679	1734	89.2136	92.136	5.0303	3.33333
AT2G24395	610	461	388	75.5738	63.6066	0.222222	1
AT2G24500	1541	1228	1085	79.6885	70.4088	5.625	1
AT2G24520	2939	2441	2133	83.0555	72.5757	0.62069	1
AT2G24550	1113	958	739	86.0737	66.3971	0.103774	0.666667
AT2G24570	1320	973	811	73.7121	61.4394	2	2.6
AT2G24580	1453	1309	1178	90.0895	81.0736	3.42857	1.57143
AT2G24590	999	856	867	85.6857	86.7868	0.176471	0.230769
AT2G24762	792	588	417	74.2424	52.6515	2	1
AT2G24820	1788	1749	1728	97.8188	96.6443	7.97059	1.32
AT2G24850	1642	1435	1505	87.3934	91.6565	0.54386	1.34343
AT2G24860	867	555	475	64.0138	54.7866	2	1.57143
AT2G24990	1685	1536	1436	91.1573	85.2226	2.25	3.8
AT2G25000	1209	896	838	74.1108	69.3135	1.33333	1.33333
AT2G25070	1517	867	1047	57.1523	69.0178	0.6	0.363636
AT2G25080	987	895	887	90.6788	89.8683	2.28571	4.2
AT2G25140	3223	2244	1775	69.6246	55.0729	0.55	0.9
AT2G25170	4402	4097	3786	93.0713	86.0064	0.804124	1.67647
AT2G25200	1172	933	665	79.6075	56.7406	1.4	0.875
AT2G25320	5122	4334	3980	84.6154	77.704	0.934426	1.42308
AT2G25430	2384	2352	2098	98.6577	88.0034	0.361233	0.820513
AT2G25490	2787	2273	2363	81.5572	84.7865	1.91892	2.64706
AT2G25510	571	512	439	89.6673	76.8827	0.638418	0.801619
AT2G25520	1530	1433	1363	93.6601	89.085	1.46154	1.05263
AT2G25560	2512	1881	1317	74.8806	52.4283	1.09091	1.42857
AT2G25590	1312	824	663	62.8049	50.5335	0.25	0.166667
AT2G25605	867	779	609	89.8501	70.2422	2.875	0.8
AT2G25610	868	618	438	71.1982	50.4608	0.8	0.615385
AT2G25650	1550	1230	1149	79.3548	74.129	2	0.875
AT2G25660	6694	4971	4255	74.2605	63.5644	2.77419	2.41176
AT2G25680	1491	1297	1053	86.9886	70.6237	1.42857	0.555556
AT2G25730	7844	5955	5664	75.9179	72.2081	2.92683	2.31429
AT2G25737	1892	1328	1101	70.1903	58.1924	4.33333	1.75
AT2G25740	2010	1158	1050	57.6119	52.2388	1.125	1
AT2G25800	3189	2735	2026	85.7636	63.5309	1.02439	0.8
AT2G25870	1951	1773	1248	90.8765	63.9672	0.870968	1.42857
AT2G25930	2658	2289	1985	86.1174	74.6802	0.179245	0.484848
AT2G25950	843	653	503	77.4614	59.6679	0.1875	0.428571
AT2G25970	2157	1890	1704	87.6217	78.9986	1.61111	0.736842
AT2G26140	2734	2436	2409	89.1002	88.1127	2.20253	3.4
AT2G26190	2022	1857	1706	91.8398	84.3719	0.585106	1.07595
AT2G26200	1896	1493	984	78.7447	51.8987	0.666667	0.6
AT2G26230	1354	1016	1270	75.0369	93.7962	0.230769	1
AT2G26250	2117	1974	1854	93.2452	87.5768	0.843575	1.31481
AT2G26280	2312	2129	2068	92.0848	89.4464	5.1	2.86111
AT2G26300	2034	1406	1524	69.1249	74.9263	1	2.66667
AT2G26340	931	885	703	95.0591	75.5102	0.9375	1.22222
AT2G26440	1754	1536	1668	87.5713	95.0969	0.970588	0.8125
AT2G26550	1065	826	699	77.5587	65.6338	0.866667	0.583333
AT2G26560	1465	1337	1265	91.2628	86.3481	0.857143	0.588235
AT2G26570	2583	2214	2337	85.7143	90.4762	0.533333	0.72
AT2G26660	1111	863	642	77.6778	57.7858	0.105263	0.125
AT2G26690	2011	1925	1822	95.7235	90.6017	1.42	1.125
AT2G26730	2546	2102	1793	82.5609	70.4242	2	2.85714
AT2G26740	1171	1053	1071	89.9231	91.4603	0.5	0.515152
AT2G26780	5828	4547	4316	78.0199	74.0563	1.77778	0.837209
AT2G26900	1508	1219	1153	80.8355	76.4589	1.85	2.88889
AT2G26910	4575	4109	3885	89.8142	84.918	1.56667	1.75
AT2G26920	2260	1941	1913	85.885	84.646	1.92857	2.1
AT2G26930	1311	944	922	72.0061	70.328	1.75	0.857143
AT2G26975	693	492	476	70.9957	68.6869	0.3	1.5
AT2G26990	1672	1074	1042	64.2344	62.3206	7.5	7.33333
AT2G27020	1035	858	776	82.8986	74.9758	1.10204	0.45098
AT2G27050	2266	2051	1861	90.5119	82.1271	1.34247	0.8
AT2G27090	2679	1727	2024	64.4644	75.5506	0.764706	0.791667
AT2G27100	2501	2192	2266	87.6449	90.6038	0.938776	1
AT2G27200	1876	1137	1226	60.6077	65.3518	0.222222	0.2
AT2G27210	3816	3437	3276	90.0681	85.8491	1.09677	0.6875
AT2G27228	2706	2075	1751	76.6814	64.7081	0.291667	0.388889
AT2G27290	824	618	671	75	81.432	3.10714	1.65217
AT2G27310	1106	907	804	82.0072	72.6944	0.2	0.428571
AT2G27360	1380	1059	938	76.7391	67.971	0.5	0.625
AT2G27420	1309	1118	971	85.4087	74.1788	1	0.761905
AT2G27600	1758	1565	1537	89.0216	87.4289	2.76471	0.948718
AT2G27660	2314	2016	2018	87.1219	87.2083	0.794118	0.809524
AT2G27680	1373	1232	1123	89.7305	81.7917	0.401515	0.581633
AT2G27820	1521	1359	869	89.3491	57.1335	0.138889	0.428571
AT2G27860	1525	1338	1296	87.7377	84.9836	4.12	1.65625
AT2G27950	3225	2803	2662	86.9147	82.5426	0.267241	0.717391
AT2G27980	3495	2409	1823	68.927	52.1602	0.246377	0.583333
AT2G28000	2120	2062	2019	97.2642	95.2358	1.33268	0.945652
AT2G28080	1718	1224	972	71.2456	56.5774	0.363636	1.14286
AT2G28320	2849	2176	2150	76.3777	75.4651	2	0.75
AT2G28370	1121	797	832	71.0972	74.2194	0.75	8
AT2G28400	749	406	501	54.2056	66.8892	2	5
AT2G28520	2947	2247	1978	76.247	67.1191	2	2.88889
AT2G28605	870	609	645	70	74.1379	0.727273	1.125
AT2G28630	1927	1541	1477	79.9689	76.6476	0.277778	0.307692
AT2G28720	701	633	488	90.2996	69.6148	0.714286	0.263158
AT2G28740	508	462	432	90.9449	85.0394	5.5	5.66667
AT2G28890	2341	2017	2005	86.1598	85.6472	5.13333	2.34783
AT2G28900	875	466	460	53.2571	52.5714	0.785714	0.433333
AT2G28950	1386	960	986	69.2641	71.14	0.282051	0.5
AT2G29110	2844	2230	1944	78.4107	68.3544	1.27273	1.08333
AT2G29140	3234	2753	2630	85.1268	81.3234	1.45238	1.15385
AT2G29180	701	729	645	103.994	92.0114	1.41935	1.4
AT2G29190	3703	3322	2995	89.711	80.8804	1.95	1.28
AT2G29210	2922	2593	2132	88.7406	72.9637	0.414634	0.85
AT2G29310	901	659	479	73.141	53.1632	0.5	0.166667
AT2G29360	1012	894	909	88.3399	89.8221	0.180328	0.5
AT2G29400	1404	1281	1164	91.2393	82.906	0.342105	0.465116
AT2G29420	887	477	580	53.7768	65.389	9.66667	4.4
AT2G29450	934	871	794	93.2548	85.0107	2.875	1.66667
AT2G29460	906	549	721	60.596	79.5806	1.66667	0.95
AT2G29510	3008	2600	2501	86.4362	83.1449	2.28571	1
AT2G29550	1666	1478	904	88.7155	54.2617	0.734375	3.66667
AT2G29560	1715	1491	1075	86.9388	62.6822	0.428571	0.363636
AT2G29670	2149	1787	1749	83.155	81.3867	0.721311	0.818182
AT2G29690	2078	1622	1341	78.0558	64.5332	0.619048	0.833333
AT2G29700	748	619	634	82.754	84.7594	0.4	1.16667
AT2G29720	1527	1152	1260	75.442	82.5147	1.18519	0.9375
AT2G29970	3378	2847	3017	84.2806	89.3132	0.9	1
AT2G29990	1749	1039	1237	59.4054	70.7261	2.8	1.46667
AT2G30040	1460	952	955	65.2055	65.411	0.25	0.285714
AT2G30050	1281	1113	835	86.8852	65.1835	8.6	6
AT2G30060	1142	936	1011	81.9615	88.5289	9.83333	3.3
AT2G30100	2878	2703	2385	93.9194	82.87	4.72222	3.27273
AT2G30110	3626	3552	3389	97.9592	93.4639	0.503067	0.644737
AT2G30150	1323	1017	967	76.8707	73.0915	5.63636	3
AT2G30250	1608	1156	1395	71.8905	86.7537	2.09091	1.42857
AT2G30330	786	579	409	73.6641	52.0356	2	0.6
AT2G30390	1859	1680	1686	90.3712	90.6939	7.6087	2.36364
AT2G30410	794	495	428	62.3426	53.9043	0.166667	0.5
AT2G30440	1860	1783	1705	95.8602	91.6667	1.88095	4.55
AT2G30470	3089	2417	1730	78.2454	56.0052	5	2.27273
AT2G30490	1803	1737	1764	96.3394	97.8369	3.77273	1.5641
AT2G30530	1467	968	1256	65.985	85.6169	0.1875	0.588235
AT2G30570	841	847	777	100.713	92.39	0.605292	1.13226
AT2G30720	1752	1277	1018	72.8881	58.105	1	1.33333
AT2G30740	1498	1209	840	80.7076	56.0748	0.538462	0.571429
AT2G30750	1686	1192	1346	70.6999	79.8339	0.26087	0.44
AT2G30870	1002	853	836	85.1297	83.4331	1.34737	0.875
AT2G30930	826	711	648	86.0775	78.4504	3.6	1.33333
AT2G30950	2337	2233	2256	95.5499	96.534	0.217352	0.820833
AT2G30980	1599	1206	1189	75.4221	74.359	1.88889	0.411765
AT2G31040	1314	1133	1055	86.2253	80.2892	0.321429	0.615385
AT2G31140	972	673	516	69.2387	53.0864	0.5	1.33333
AT2G31240	2051	1277	1385	62.2623	67.528	1	1.14286
AT2G31260	3239	1910	2282	58.9688	70.4538	2.125	1.45455
AT2G31360	1447	1166	1059	80.5805	73.1859	0.985915	0.69697
AT2G31380	1125	892	772	79.2889	68.6222	0.333333	0.555556
AT2G31390	1283	1071	1057	83.4762	82.385	5.44444	1.72727
AT2G31400	3110	2983	2935	95.9164	94.373	1.20803	1.57732
AT2G31510	2034	1609	1426	79.1052	70.1082	1.72222	0.695652
AT2G31570	853	600	739	70.34	86.6354	0.5	1.57143
AT2G31610	1089	1023	969	93.9394	88.9807	0.130435	0.133333
AT2G31660	3812	3594	3269	94.2812	85.7555	0.769231	0.45
AT2G31670	968	969	759	100.103	78.4091	0.210526	0.714286
AT2G31740	2529	1562	1579	61.7635	62.4357	1.28571	2.6
AT2G31750	1603	1551	1458	96.7561	90.9545	3.75	1.36364
AT2G31790	1629	1543	1386	94.7207	85.0829	6.7541	2.90909
AT2G31800	1773	1205	1374	67.9639	77.4958	8.4	2.56522
AT2G31820	1989	1856	1911	93.3132	96.0784	1.33333	1.63333
AT2G31840	1184	982	785	82.9392	66.3007	1.3	2
AT2G31880	2084	2014	2041	96.6411	97.9367	0.591195	0.536313
AT2G31890	2668	2418	1877	90.6297	70.3523	3.32	6.05882
AT2G31960	5880	5296	5322	90.068	90.5102	0.837349	2.025
AT2G31970	4371	3059	2810	69.984	64.2873	1.29167	0.545455
AT2G32010	2745	2127	1933	77.4863	70.4189	1.25	2.4
AT2G32040	1937	1669	1033	86.1642	53.3299	0.484848	2.66667
AT2G32140	1291	681	1047	52.7498	81.0999	4.5	2
AT2G32180	628	514	489	81.8471	77.8662	1.66667	0.833333
AT2G32240	4480	3785	4180	84.4866	93.3036	0.233333	0.570312
AT2G32290	1853	1301	1288	70.2105	69.5089	1.63636	1.09091
AT2G32380	749	518	411	69.1589	54.8732	1.36364	0.857143
AT2G32450	2810	2494	1907	88.7544	67.8648	3.23077	2.36364
AT2G32520	1118	854	987	76.3864	88.2826	3.625	2.63636
AT2G32540	2268	1727	2126	76.1464	93.739	0.5	1.28571
AT2G32560	1367	1212	745	88.6613	54.4989	0.155556	1.66667
AT2G32580	920	726	742	78.913	80.6522	0.7	2.5
AT2G32680	2846	2143	1582	75.2987	55.5868	4.1	2.5
AT2G32730	3430	3081	3088	89.8251	90.0292	1.15663	0.597015
AT2G32800	2728	2543	2490	93.2185	91.2757	1.5	0.888889
AT2G32810	2972	2604	2257	87.6178	75.9421	1.22222	0.518519
AT2G32900	2583	1710	1642	66.2021	63.5695	2	1.5
AT2G32910	2406	2111	1816	87.739	75.478	0.952381	1.15385
AT2G32920	1573	1363	1186	86.6497	75.3973	3.75	1.2
AT2G32950	2348	1973	2103	84.029	89.5656	0.608696	0.92
AT2G32960	1239	714	699	57.6271	56.4165	0.222222	0.25
AT2G33040	1402	1239	1295	88.3738	92.368	2.81579	3.5
AT2G33150	1882	1563	1727	83.0499	91.7641	2.98438	1.28358
AT2G33170	4012	2679	2395	66.7747	59.6959	1.63636	1.1
AT2G33180	670	535	490	79.8507	73.1343	4.5	7
AT2G33210	2107	1434	1300	68.0589	61.6991	2.83333	1.66667
AT2G33250	955	888	738	92.9843	77.2775	3	6.5
AT2G33255	990	800	683	80.8081	68.9899	0.625	0.5
AT2G33370	664	501	446	75.4518	67.1687	2.25	2.22222
AT2G33390	1140	725	653	63.5965	57.2807	0.166667	0.3
AT2G33410	1756	1577	1543	89.8064	87.8702	1.93548	0.923077
AT2G33435	3032	2284	2273	75.3298	74.967	1.4375	1.30769
AT2G33490	2075	1654	1831	79.7108	88.241	1.875	0.5
AT2G33510	789	500	451	63.3714	57.161	6	4
AT2G33530	1642	1650	1425	100.487	86.7844	2.2	1.04
AT2G33550	1194	1012	624	84.7571	52.2613	4	2
AT2G33600	1286	1139	789	88.5692	61.353	0.928571	0.6
AT2G33630	1620	1409	1280	86.9753	79.0123	1.45714	1.04545
AT2G33730	2523	2395	2461	94.9267	97.5426	0.496183	1
AT2G33770	4103	3916	3772	95.4424	91.9327	1.51639	1.13095
AT2G33800	1143	1096	1036	95.888	90.6387	1.47042	1.21951
AT2G34070	1438	1206	1075	83.8665	74.7566	0.589744	1.27778
AT2G34160	636	357	530	56.1321	83.3333	4	0.375
AT2G34357	4015	3646	3215	90.8095	80.0747	0.755556	1.125
AT2G34420	1045	1106	1013	105.837	96.9378	3.24834	1.36533
AT2G34430	1008	1009	989	100.099	98.1151	2.38396	1.16382
AT2G34460	1096	1062	1016	96.8978	92.7007	0.6	0.633333
AT2G34510	1470	1365	1013	92.8571	68.9116	1.02703	4
AT2G34520	885	606	518	68.4746	58.5311	0.153846	0.428571
AT2G34585	591	591	338	100	57.1912	0.428571	0.5
AT2G34660	5617	5077	4896	90.3863	87.164	1.26744	2.29268
AT2G34690	1021	805	891	78.8443	87.2674	0.117647	0.32
AT2G34730	2759	1740	1614	63.0663	58.4995	0.818182	0.714286
AT2G34750	2186	1635	1112	74.7941	50.8692	1.18182	0.730769
AT2G34770	1142	800	795	70.0525	69.6147	0.157895	1
AT2G34810	1807	1606	1263	88.8766	69.8949	0.75	1.09091
AT2G34940	1989	1175	1221	59.0749	61.3876	4.2	1.25
AT2G34970	2475	2030	1951	82.0202	78.8283	0.575758	1.11765
AT2G35020	1830	1474	1077	80.5464	58.8525	6.33333	1
AT2G35050	4013	3942	3968	98.2308	98.8786	1.30435	0.979021
AT2G35320	1277	860	781	67.3453	61.159	2	1
AT2G35330	2674	2295	2180	85.8265	81.5258	0.862069	1.0625
AT2G35370	803	750	712	93.3998	88.6675	0.341463	1.22581
AT2G35410	1104	1076	1043	97.4638	94.4746	7.33333	1
AT2G35490	1376	1304	1216	94.7674	88.3721	0.680556	0.8
AT2G35500	1425	1440	1049	101.053	73.614	1.94737	1.14286
AT2G35510	2299	1913	1851	83.2101	80.5133	0.724138	0.458333
AT2G35540	1728	1420	981	82.1759	56.7708	1	1
AT2G35605	677	368	496	54.3575	73.2644	0.2	0.25
[truncated: 3,618 more rows]

## Sheet: chloroplast mRNAs
AGI	transcript length (bp)	bp covered, wt	bp covered, zwg	% covered, wt	% covered, zwg	5' to 3' coverage index wt	5' to 3' coverage index zwg
ATCG00120	1524	1598	1599	104.856	104.921	2.01582	1.48144
ATCG00170	4131	2820	2512	68.2643	60.8085	0.810811	1.17647
ATCG00180	2043	2031	1992	99.4126	97.5037	1.192	0.690537
ATCG00190	3219	3289	3292	102.175	102.268	0.852886	0.704587
ATCG00210	90	164	164	182.222	182.222	1.125	1.22222
ATCG00220	105	179	110	170.476	104.762	1.3	0.4375
ATCG00380	606	564	568	93.0693	93.7294	1.11111	1
ATCG00470	399	406	389	101.754	97.4937	0.514706	0.75
ATCG00490	1440	1459	1465	101.319	101.736	0.344595	0.75
ATCG00500	1467	1537	1540	104.772	104.976	0.651852	0.317568
ATCG00510	114	120	116	105.263	101.754	0.769231	1
ATCG00520	555	481	629	86.6667	113.333	0.91954	1.44578
ATCG00530	690	693	688	100.435	99.7101	1.58621	1.90244
ATCG00550	123	80	112	65.0407	91.0569	3	1.5
ATCG00560	117	181	108	154.701	92.3077	1.5	1
ATCG00590	96	75	75	78.125	78.125	2	0.5
ATCG00750	417	425	385	101.918	92.3261	0.869565	1.58333
ATCG00760	114	93	75	81.5789	65.7895	3.125	1
ATCG00770	405	408	463	100.741	114.321	2.11667	1.28571
ATCG00780	369	370	346	100.271	93.7669	2	2.2
ATCG00790	408	413	387	101.225	94.8529	0.983333	1.86957
ATCG00800	657	541	624	82.344	94.9772	0.875	0.736842
ATCG00810	483	378	378	78.2609	78.2609	3	0.875
ATCG00820	279	263	207	94.2652	74.1935	1.4	0.5
ATCG00830	825	788	722	95.5152	87.5152	0.175	0.363636
ATCG00860	6885	5007	3619	72.7233	52.5635	1.36923	1.57692
ATCG01000	1032	959	867	92.9264	84.0116	5.55556	4.5
ATCG01010	2241	2222	2145	99.1522	95.7162	0.116337	0.144144
ATCG01020	159	94	136	59.1195	85.5346	5	3
ATCG01240	468	534	526	114.103	112.393	1.11429	1.53571
ATCG01250	1170	1192	1234	101.88	105.47	4.29878	9.48
ATCG01270	234	239	236	102.137	100.855	0.727273	1
ATCG01300	282	195	150	69.1489	53.1915	0.333333	0.5
ATCG01310	825	720	441	87.2727	53.4545	0.571429	1.33333
